# Supplementary material for: Utility of Circulating Cell-Free DNA in Assessing Microsatellite Instability and Loss of Heterozygosity in Breast Cancer Using Human Identification Approach
Source: MDPI journal article supplement (doi:10.3390/genes13040590), 2022-03-25
Supplement: s1 [file s1]

**Table S1.** STR profiling results of Cf-DNA and genomic DNA extracted from healthy controls' samples.

| Sample ID | D13S317 | D7S820 | D2S1338 | D21S11    | D16S539 | D18S51  | CSF1PO | FGA   | Alleles (%)  | Genetic alterations                                                                                                       |
|-----------|---------|--------|---------|-----------|---------|---------|--------|-------|--------------|---------------------------------------------------------------------------------------------------------------------------|
| C1        | 11,12   | 11,12  | 20,24   | 29,31     | 11,13   | 14.2,16 | 11,12  | 23,24 | 12/16 (75%)  | -LOH in D13S317: deletion of allele (12)<br>-LOH in D7S820: deletion of allele (12)<br>-Allelic dropout in D18S51 and FGA |
| Cp1       | 11,11   | 11,11  | 20,24   | 29,31     | 11,13   | DO      | 11,12  | DO    |              |                                                                                                                           |
| C2        | 9,13    | 9,10   | 17,17   | 29,29     | 10,11   | 13.2,17 | 12,12  | 20,24 | 16/16 (100%) |                                                                                                                           |
| Cp2       | 9,13    | 9,10   | 17,17   | 29,29     | 10,11   | 13.2,17 | 12,12  | 20,24 |              |                                                                                                                           |
| C3        | 12,12   | 8,12   | 19,20   | 29.2,29.2 | 9,11    | 13,16   | 11,11  | 24,25 | 16/16 (100%) |                                                                                                                           |
| Cp3       | 12,12   | 8,12   | 19,20   | 29.2,29.2 | 9,11    | 13,16   | 11,11  | 24,25 |              |                                                                                                                           |
| C4        | 11,13   | 9,12   | 16,17   | 28.2,28.2 | 11,12   | 11,15   | 12,12  | 19,21 | 16/16 (100%) |                                                                                                                           |
| Cp4       | 11,13   | 9,12   | 16,17   | 28.2,28.2 | 11,12   | 11,15   | 12,12  | 19,21 |              |                                                                                                                           |
| C5        | 8,12    | 9,10   | 16,17   | 29.2,29.2 | 9,12    | 11,16   | 10,11  | 23,23 | 16/16 (100%) |                                                                                                                           |
| Cp5       | 8,12    | 9,10   | 16,17   | 29.2,29.2 | 9,12    | 11,16   | 10,11  | 23,23 |              |                                                                                                                           |

|      |       |       |       |           |       |           |       |       |              |  |
|------|-------|-------|-------|-----------|-------|-----------|-------|-------|--------------|--|
| C6   | 8,12  | 10,11 | 18,20 | 29.2,29.2 | 9,12  | 13.2,17   | 12,12 | 21,23 | 16/16 (100%) |  |
| Cp6  | 8,12  | 10,11 | 18,20 | 29.2,29.2 | 9,12  | 13.2,17   | 12,12 | 21,23 |              |  |
| C7   | 10,12 | 10,12 | 20,25 | 28.2,29.2 | 11,11 | 11,17     | 11,11 | 22,24 | 16/16 (100%) |  |
| Cp7  | 10,12 | 10,12 | 20,25 | 28.2,29.2 | 11,11 | 11,17     | 11,11 | 22,24 |              |  |
| C8   | 11,12 | 9,11  | 17,19 | 29,30     | 11,11 | 13,18     | 10,11 | 22,25 | 16/16 (100%) |  |
| Cp8  | 11,12 | 9,11  | 17,19 | 29,30     | 11,11 | 13,18     | 10,11 | 22,25 |              |  |
| C9   | 11,12 | 8,9   | 16,20 | 28.2,28.2 | 11,11 | 13,19     | 11,12 | 20,25 | 16/16 (100%) |  |
| Cp9  | 11,12 | 8,9   | 16,20 | 28.2,28.2 | 11,11 | 13,19     | 11,12 | 20,25 |              |  |
| C10  | 11,12 | 8,10  | 19,22 | 28,32     | 12,12 | 13,13.2   | 10,12 | 23,26 | 16/16 (100%) |  |
| Cp10 | 11,12 | 8,10  | 9,22  | 28,32     | 12,12 | 13,13.2   | 10,12 | 23,26 |              |  |
| C11  | 11,11 | 10,10 | 20,21 | 28,29.2   | 11,12 | 13,21     | 11,12 | 23,24 | 16/16 (100%) |  |
| Cp11 | 11,11 | 10,10 | 20,21 | 28.2,29.2 | 11,12 | 13,21     | 11,12 | 23,24 |              |  |
| C12  | 11,12 | 8,9   | 21,26 | 28,28     | 11,11 | 13.2,14.2 | 11,11 | 20,26 | 16/16 (100%) |  |
| Cp12 | 11,12 | 8,9   | 21,26 | 28,28     | 11,11 | 13.2,14.2 | 11,11 | 20,26 |              |  |
| C13  | 8,12  | 9,11  | 17,17 | 28.2,29.2 | 11,11 | 14.2,19   | 11,12 | 20,24 | 16/16 (100%) |  |

|      |       |       |       |           |       |         |       |       |              |                                   |
|------|-------|-------|-------|-----------|-------|---------|-------|-------|--------------|-----------------------------------|
| Cp13 | 8,12  | 9,11  | 17,17 | 28.2,29.2 | 11,11 | 14.2,19 | 11,12 | 20,24 |              |                                   |
| C14  | 9,12  | 10,11 | 16,19 | 29.2,31   | 9,12  | 12,19   | 11,11 | 19,22 | 12/16 (75%)  | Allelic dropout in D21S11 and FGA |
| Cp14 | 9,12  | 10,11 | 16,19 | DO        | 9,12  | 12,19   | 11,11 | DO    |              |                                   |
| C15  | 12,14 | 8,10  | 20,23 | 29,32.2   | 12,13 | 12,20   | 10,10 | 19,23 | 16/16 (100%) |                                   |
| Cp15 | 12,14 | 8,10  | 20,23 | 29,32.2   | 12,13 | 12,20   | 10,10 | 19,23 |              |                                   |
| C16  | 8,14  | 8,10  | 17,23 | 28,29.2   | 9,11  | 15,17   | 11,12 | 19,25 | 16/16 (100%) |                                   |
| Cp16 | 8,14  | 8,10  | 17,23 | 28,29.2   | 9,11  | 15,17   | 11,12 | 19,25 |              |                                   |
| C17  | 12,13 | 12,13 | 17,19 | 28,29     | 8,11  | 16,17   | 9,11  | 22,25 | 16/16 (100%) |                                   |
| Cp17 | 12,13 | 12,13 | 17,19 | 28,29     | 8,11  | 16,17   | 9,11  | 22,25 |              |                                   |
| C18  | 9,11  | 9,11  | 19,21 | 28,29     | 8,12  | 13,14   | 10,11 | 23,24 | 16/16 (100%) |                                   |
| Cp18 | 9,11  | 9,11  | 19,21 | 28,29     | 8,12  | 13,14   | 10,11 | 23,24 |              |                                   |
| C19  | 8,13  | 10,11 | 18,25 | 28,29     | 12,13 | 15,17   | 10,12 | 22,23 | 16/16 (100%) |                                   |
| Cp19 | 8,13  | 10,11 | 18,25 | 28,29     | 12,13 | 15,17   | 10,12 | 22,23 |              |                                   |
| C20  | 12,12 | 10,11 | 20,22 | 29,32.2   | 9,11  | 12,17   | 11,11 | 20,21 | 16/16 (100%) |                                   |
| Cp20 | 12,12 | 10,11 | 20,22 | 29,32.2   | 9,11  | 12,17   | 11,11 | 20,21 |              |                                   |

|      |       |       |       |           |       |       |       |       |              |                                                                                   |
|------|-------|-------|-------|-----------|-------|-------|-------|-------|--------------|-----------------------------------------------------------------------------------|
| C21  | 11,13 | 10,10 | 20,20 | 28,31.2   | 9,11  | 13,18 | 11,12 | 20,22 | 16/16 (100%) |                                                                                   |
| Cp21 | 11,13 | 10,10 | 20,20 | 28,31.2   | 9,11  | 13,18 | 11,12 | 20,22 |              |                                                                                   |
| C22  | 11,13 | 8,11  | 16,20 | 30,31.2   | 11,11 | 12,12 | 10,12 | 24,24 | 16/16 (100%) |                                                                                   |
| Cp22 | 11,13 | 8,11  | 16,20 | 30,31.2   | 11,11 | 12,12 | 10,12 | 24,24 |              |                                                                                   |
| C23  | 9,11  | 8,9   | 17,23 | 28,30     | 11,12 | 13,14 | 10,11 | 20,22 | 16/16 (100%) | - LOH in D18S51: deletion of allele (13)<br>- LOH in FGA: deletion of allele (20) |
| Cp23 | 9,11  | 8,9   | 17,23 | 28,30     | 11,12 | 14,14 | 10,11 | 22,22 |              |                                                                                   |
| C24  | 11,13 | 9,10  | 20,21 | 29,29.2   | 9,11  | 14,18 | 10,11 | 21,25 | 16/16 (100%) |                                                                                   |
| Cp24 | 11,13 | 9,10  | 20,21 | 29,29.2   | 9,11  | 14,18 | 10,11 | 21,25 |              |                                                                                   |
| C25  | 11,12 | 10,10 | 20,23 | 31.2,32.2 | 11,12 | 16,16 | 11,12 | 23,24 | 16/16 (100%) |                                                                                   |
| Cp25 | 11,12 | 10,10 | 20,23 | 31.2,32.2 | 11,12 | 16,16 | 11,12 | 23,24 |              |                                                                                   |
| C26  | 11,12 | 10,12 | 19,19 | 29,33.2   | 8,11  | 12,14 | 11,11 | 22,23 | 16/16 (100%) |                                                                                   |
| Cp26 | 11,12 | 10,12 | 19,19 | 29,33.2   | 8,11  | 12,14 | 11,11 | 22,23 |              |                                                                                   |
| C27  | 11,11 | 8,8   | 21,24 | 29,29     | 11,13 | 16,20 | 12,12 | 22,23 | 16/16 (100%) |                                                                                   |

|      |       |       |       |           |       |       |       |       |              |  |
|------|-------|-------|-------|-----------|-------|-------|-------|-------|--------------|--|
| Cp27 | 11,11 | 8,8   | 21,24 | 29,29     | 11,13 | 16,20 | 12,12 | 22,23 |              |  |
| C28  | 12,12 | 10,11 | 17,17 | 29,32.2   | 11,13 | 13,16 | 10,12 | 24,25 | 16/16 (100%) |  |
| Cp28 | 12,12 | 10,11 | 17,17 | 29,32.2   | 11,13 | 13,16 | 10,12 | 24,25 |              |  |
| C29  | 8,12  | 8,8   | 19,20 | 29,32.2   | 10,10 | 13,14 | 11,12 | 23,25 | 16/16 (100%) |  |
| Cp29 | 8,12  | 8,8   | 19,20 | 29,32.2   | 10,10 | 13,14 | 11,12 | 23,25 |              |  |
| C30  | 12,13 | 10,11 | 21,23 | 31.2,32.2 | 10,12 | 13,13 | 10,11 | 20,21 | 16/16 (100%) |  |
| Cp30 | 12,13 | 10,11 | 21,23 | 31.2,32.2 | 10,12 | 13,13 | 10,11 | 20,21 |              |  |
| C31  | 12,13 | 10,10 | 20,23 | 29,33     | 12,13 | 16,16 | 10,11 | 21,27 | 16/16 (100%) |  |
| Cp31 | 12,13 | 10,10 | 20,23 | 29,33     | 12,13 | 16,16 | 10,11 | 21,27 |              |  |
| C32  | 9,11  | 8,10  | 17,26 | 29,31.2   | 9,12  | 14,18 | 10,11 | 21,25 | 16/16 (100%) |  |
| Cp32 | 9,11  | 8,10  | 17,26 | 29,31.2   | 9,12  | 14,18 | 10,11 | 21,25 |              |  |
| C33  | 11,12 | 11,12 | 16,18 | 29,32.2   | 11,14 | 15,16 | 10,11 | 24,29 | 16/16 (100%) |  |
| Cp33 | 11,12 | 11,12 | 16,18 | 29,32.2   | 11,14 | 15,16 | 10,11 | 24,29 |              |  |
| C34  | 11,12 | 10,10 | 20,21 | 30,31.2   | 8,11  | 16,19 | 10,11 | 23,25 | 16/16 (100%) |  |
| Cp34 | 11,12 | 10,10 | 20,21 | 30,31.2   | 8,11  | 16,19 | 10,11 | 23,25 |              |  |

|      |       |       |       |           |       |       |       |       |              |                                                                                         |
|------|-------|-------|-------|-----------|-------|-------|-------|-------|--------------|-----------------------------------------------------------------------------------------|
| C35  | 10,12 | 10,11 | 25,25 | 28,29     | 8,8   | 13,17 | 10,10 | 21,24 | 16/16 (100%) |                                                                                         |
| Cp35 | 10,12 | 10,11 | 25,25 | 28,29     | 8,8   | 13,17 | 10,10 | 21,24 |              |                                                                                         |
| C36  | 12,13 | 10,11 | 18,22 | 28,30     | 11,13 | 12,18 | 11,12 | 27,28 | 16/16 (100%) |                                                                                         |
| Cp36 | 12,13 | 10,11 | 18,22 | 28,30     | 11,13 | 12,18 | 11,12 | 27,28 |              |                                                                                         |
| C37  | 8,12  | 8,12  | 17,23 | 32.2,32.2 | 9,12  | 12,13 | 10,13 | 23,24 | 16/16 (100%) |                                                                                         |
| Cp37 | 8,12  | 8,12  | 17,23 | 32.2,32.2 | 9,12  | 12,13 | 10,13 | 23,24 |              |                                                                                         |
| C38  | 8,11  | 11,12 | 19,20 | 28,31.2   | 11,11 | 14,18 | 11,11 | 20,24 | 16/16 (100%) |                                                                                         |
| Cp38 | 8,11  | 11,12 | 19,20 | 28,31.2   | 11,11 | 14,18 | 11,11 | 20,24 |              |                                                                                         |
| C39  | 12,13 | 10,12 | 20,21 | 30,31     | 9,12  | 14,19 | 10,10 | 25,25 | 16/16 (100%) | - LOH in D7S820: deletion of allele (12)<br><br>-LOH in D18S51: Deletion of allele (19) |
| Cp39 | 12,13 | 10,10 | 20,21 | 30,31     | 9,12  | 14,14 | 10,10 | 25,25 |              |                                                                                         |
| C40  | 8,13  | 8,8   | 20,23 | 31.2,32.2 | 11,11 | 12,16 | 10,13 | 21,23 | 16/16 (100%) |                                                                                         |
| Cp40 | 8,13  | 8,8   | 20,23 | 31.2,32.2 | 11,11 | 12,16 | 10,13 | 21,23 |              |                                                                                         |

C, genomic DNA STR profile; Cp, Cf-DNA STR profile; DO, allelic dropout; LOH, loss of heterozygosity; MSI, microsatellite instability.
