# Supplementary material for: Utility of Circulating Cell-Free DNA in Assessing Microsatellite Instability and Loss of Heterozygosity in Breast Cancer Using Human Identification Approach
Source: MDPI journal article supplement (doi:10.3390/genes13040590), 2022-03-25
Supplement: s1 [file s1]

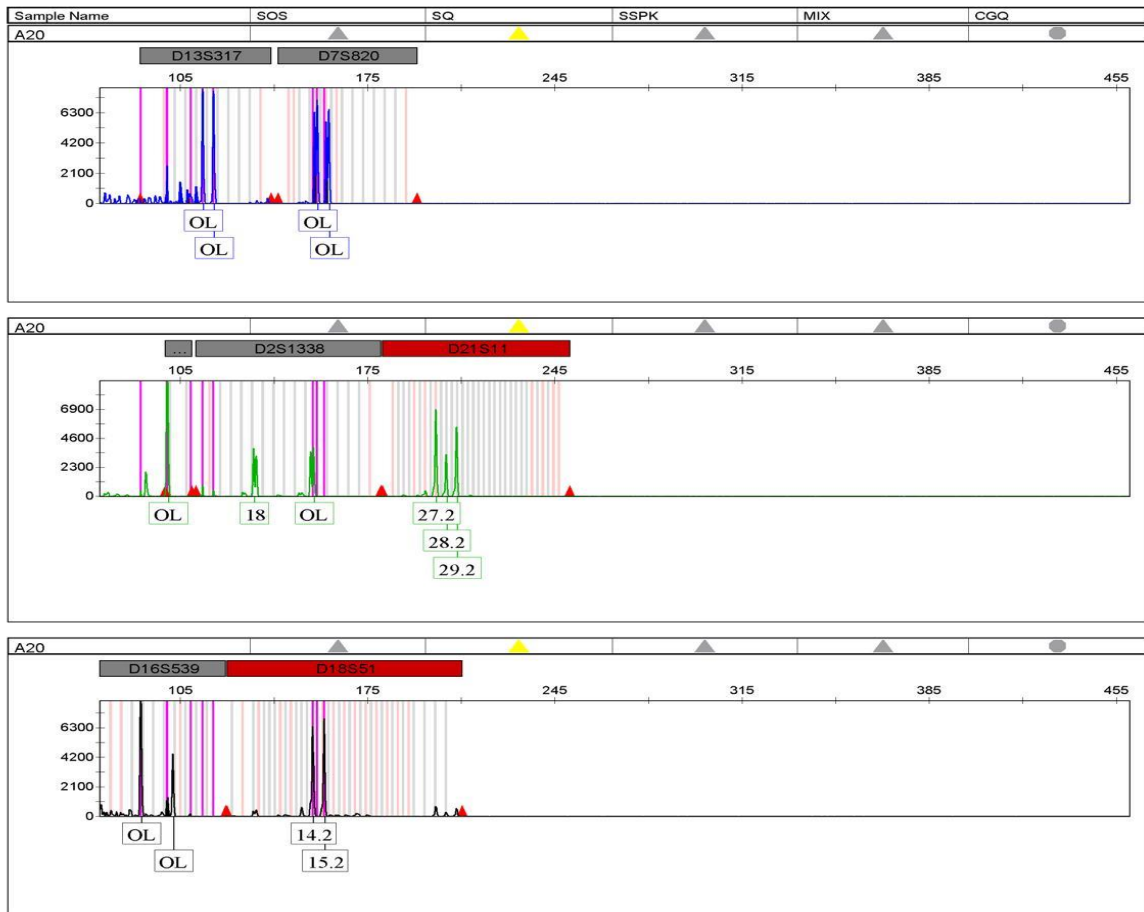

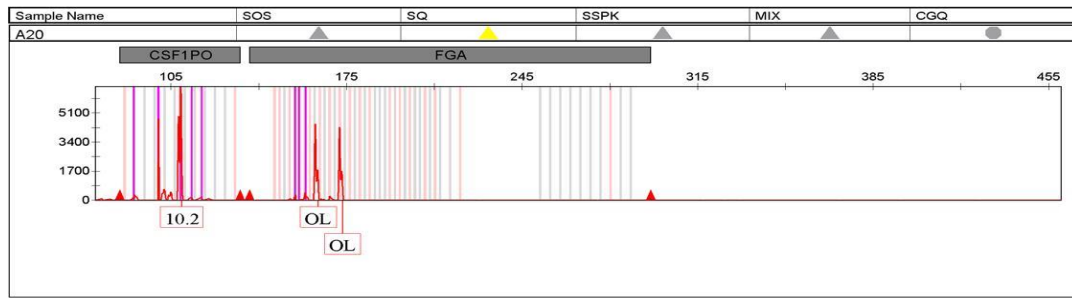

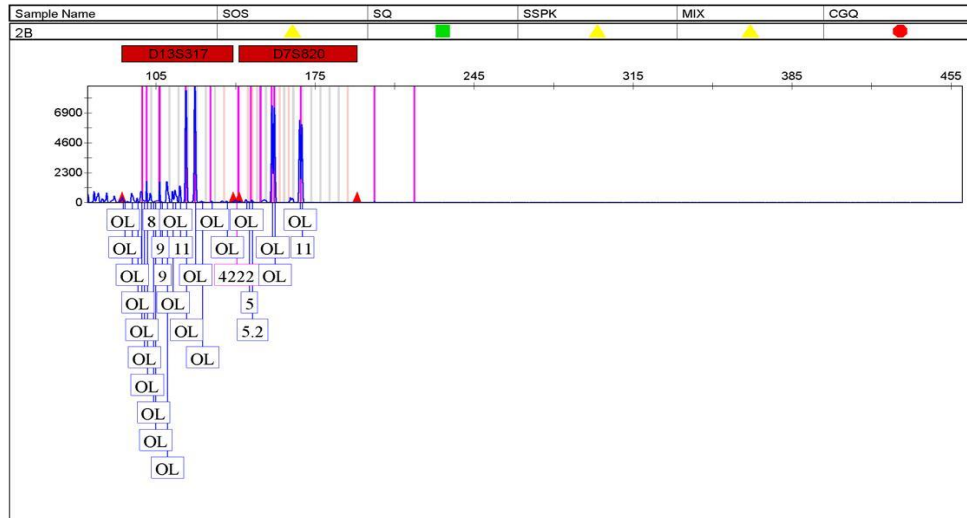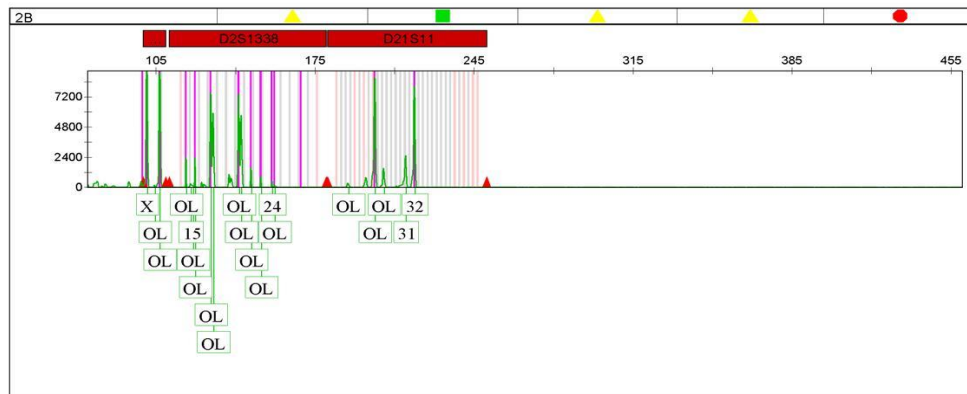

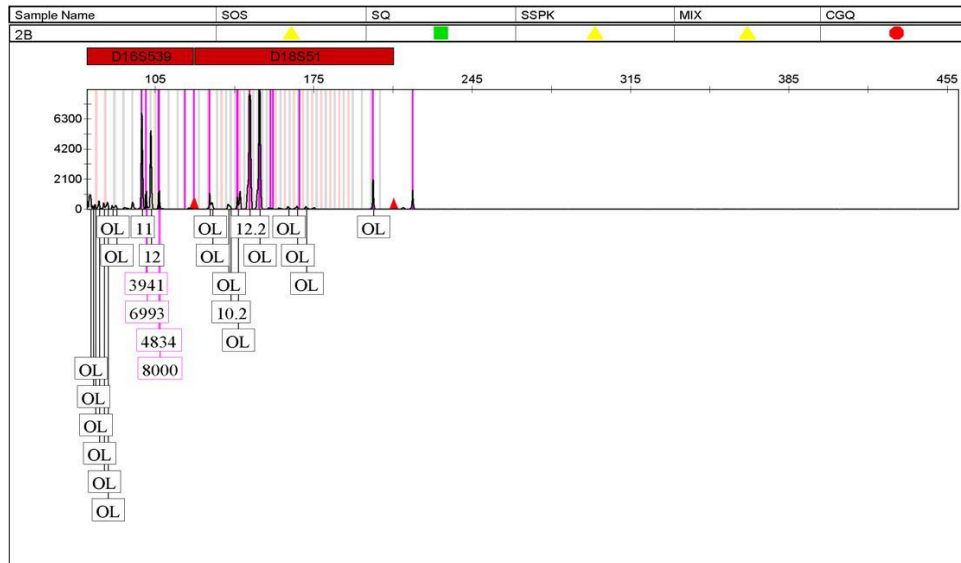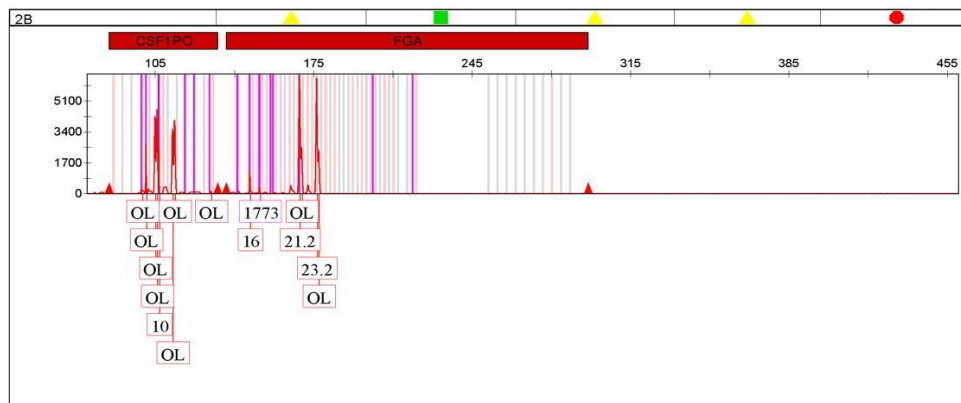



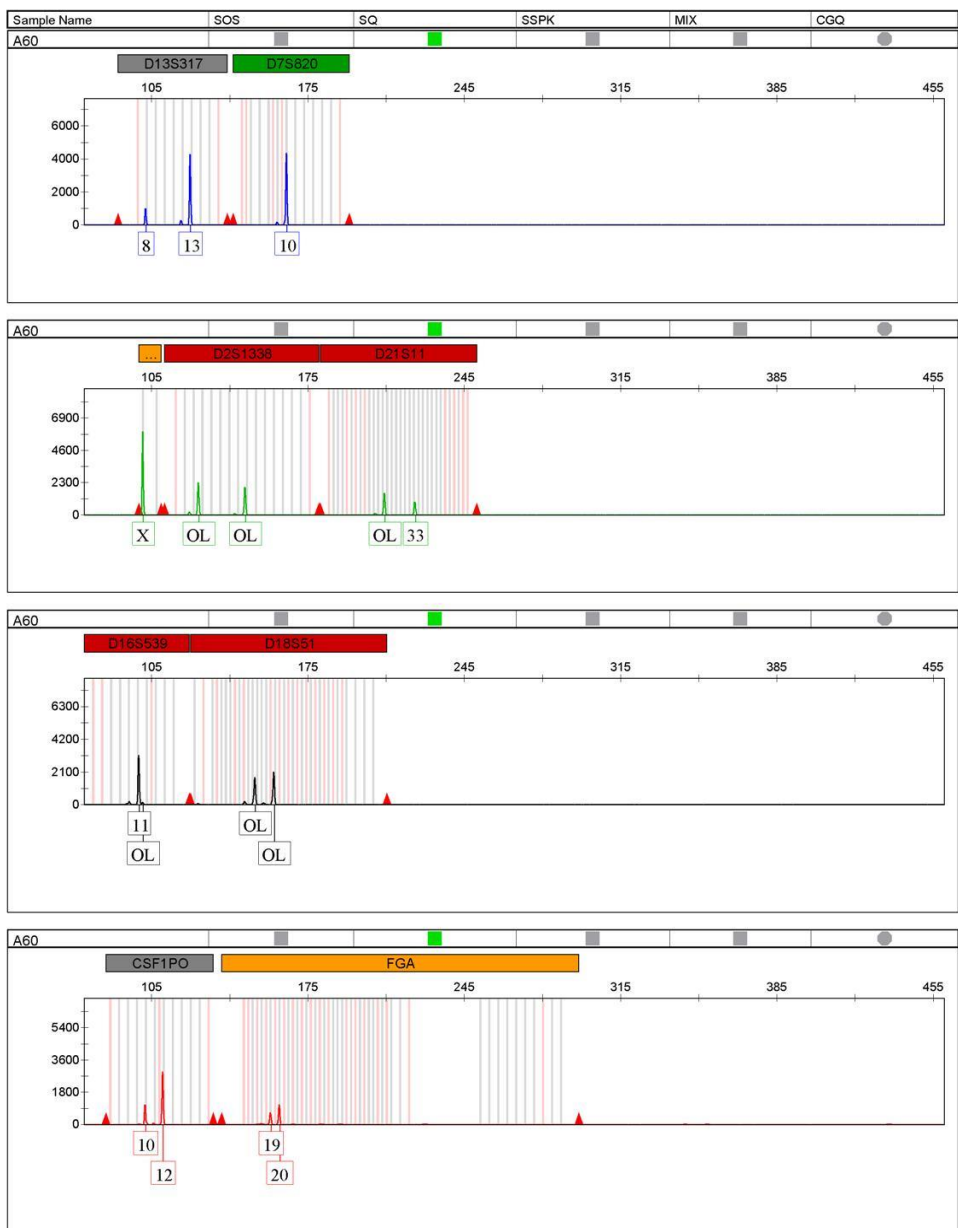

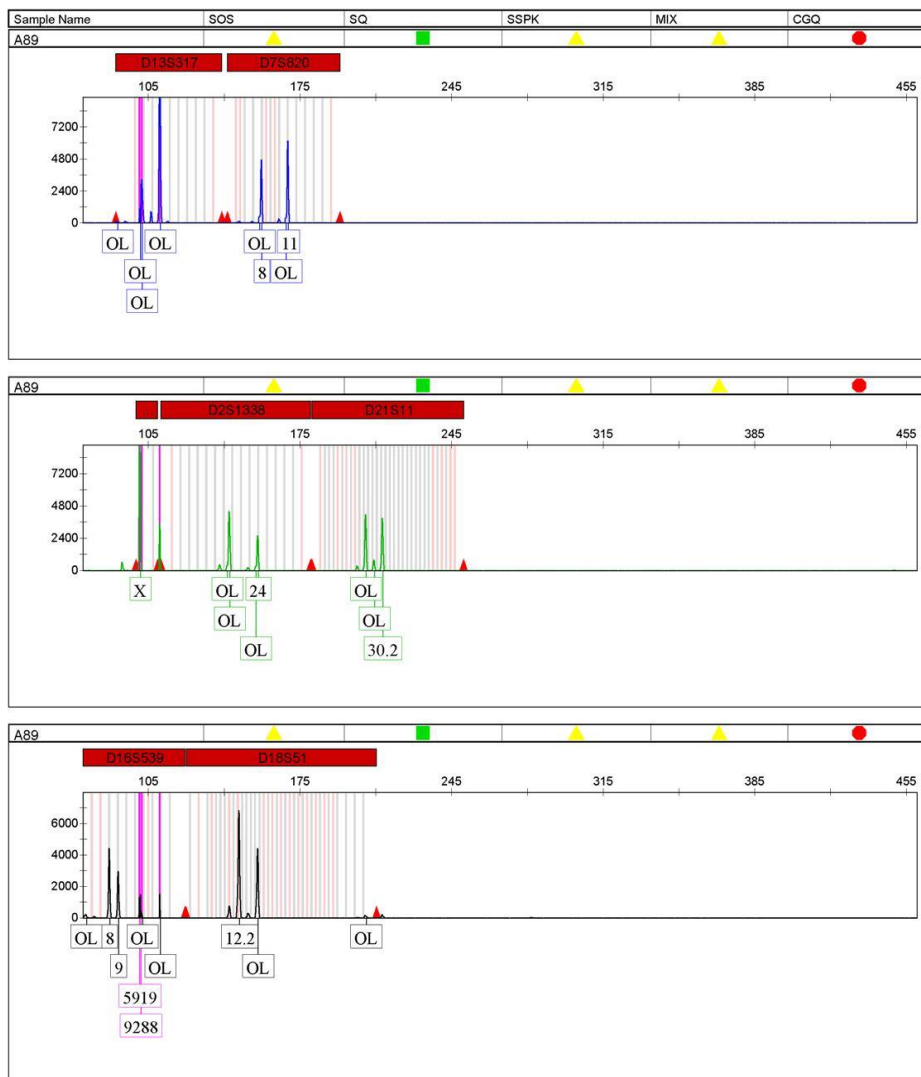

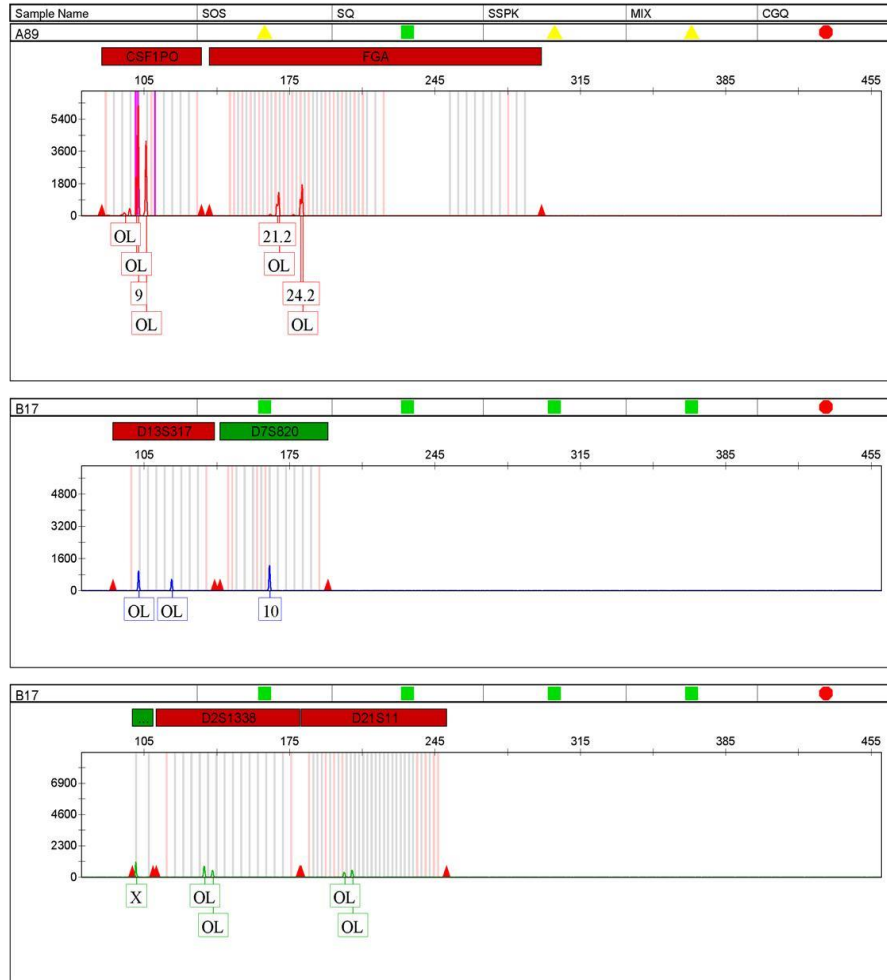

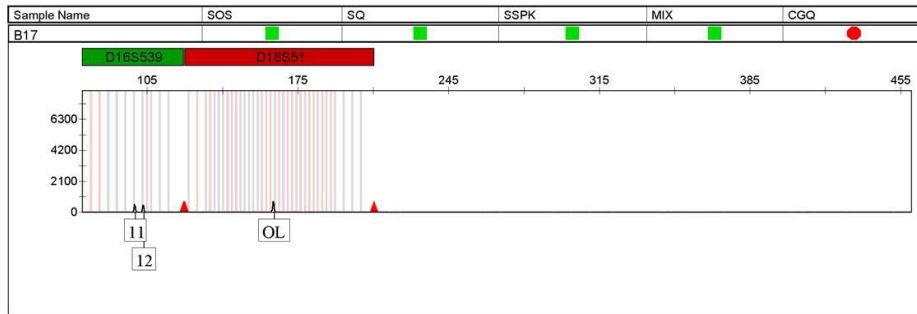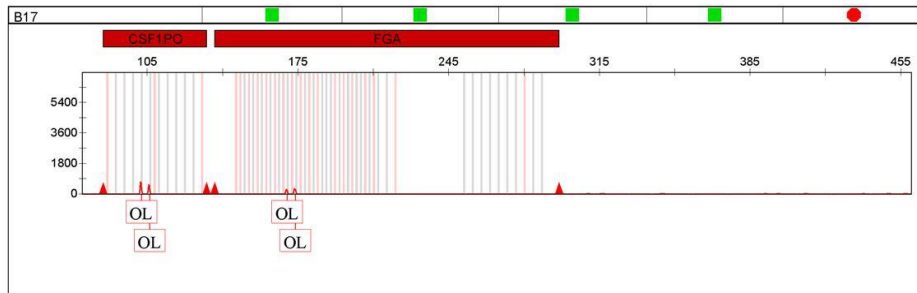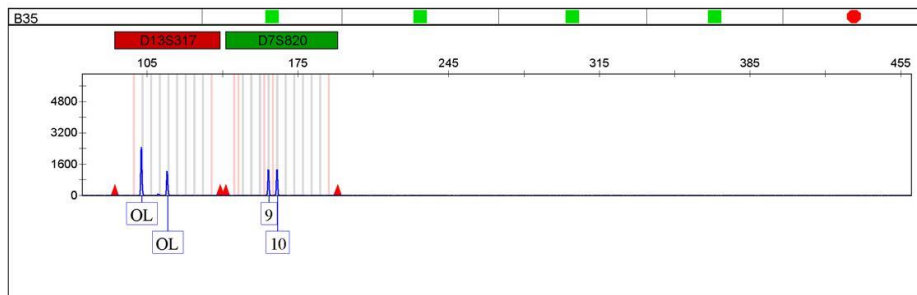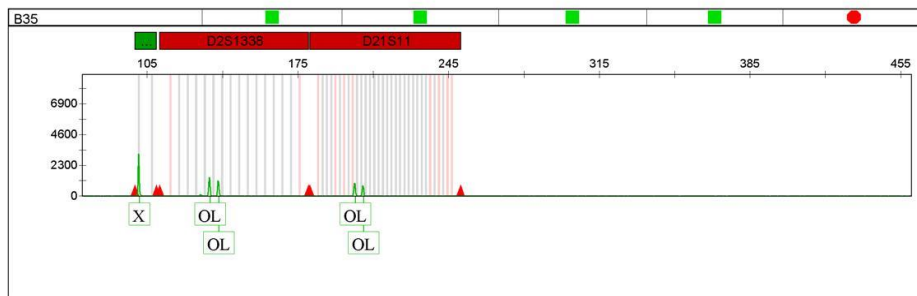

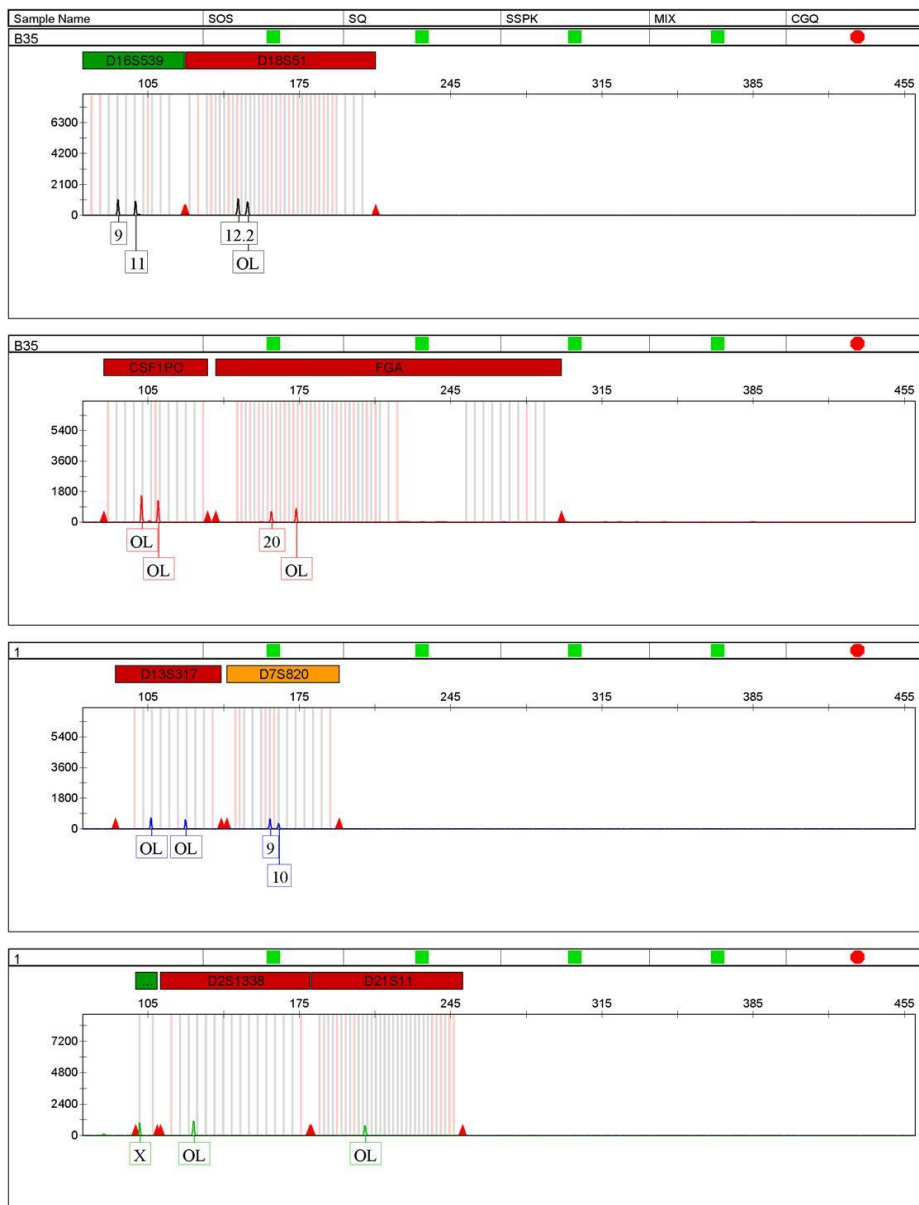

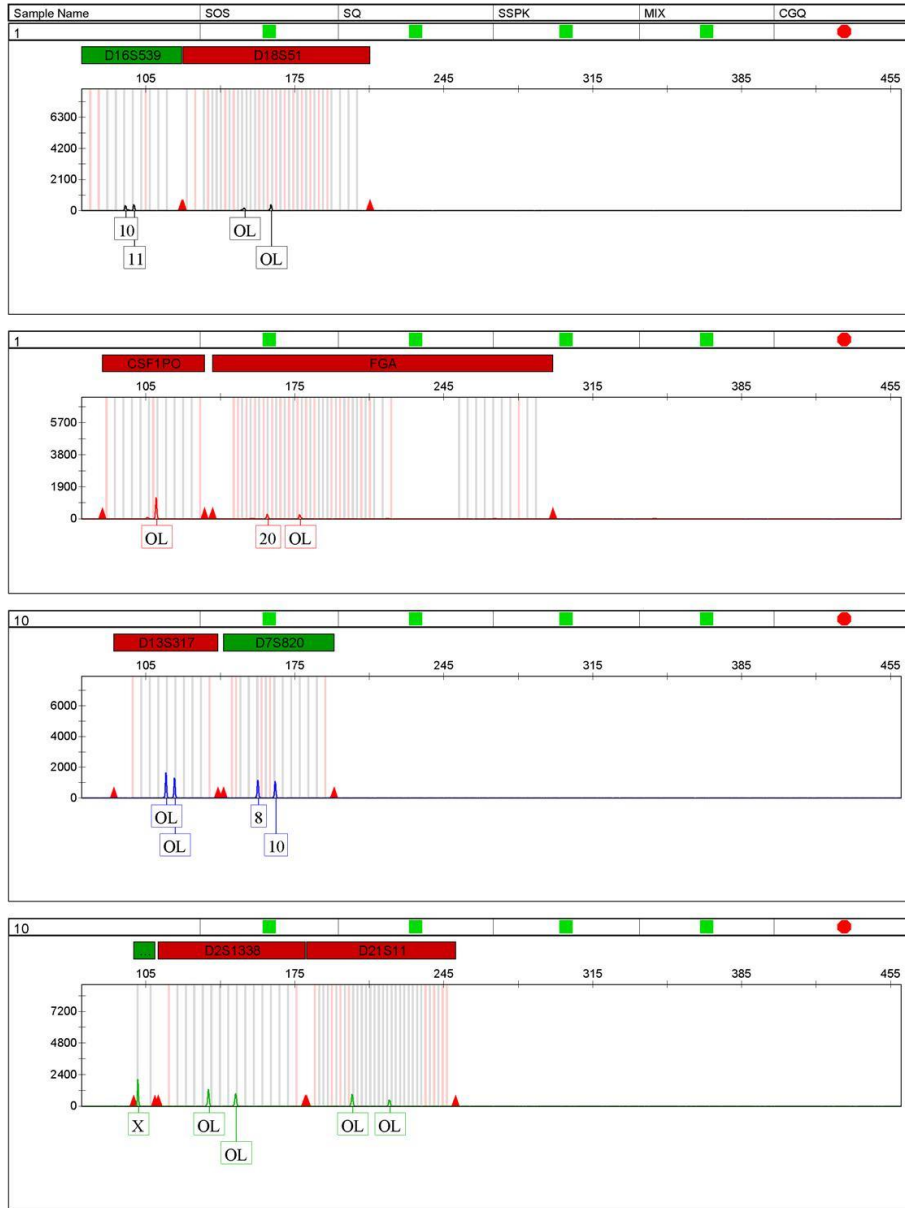

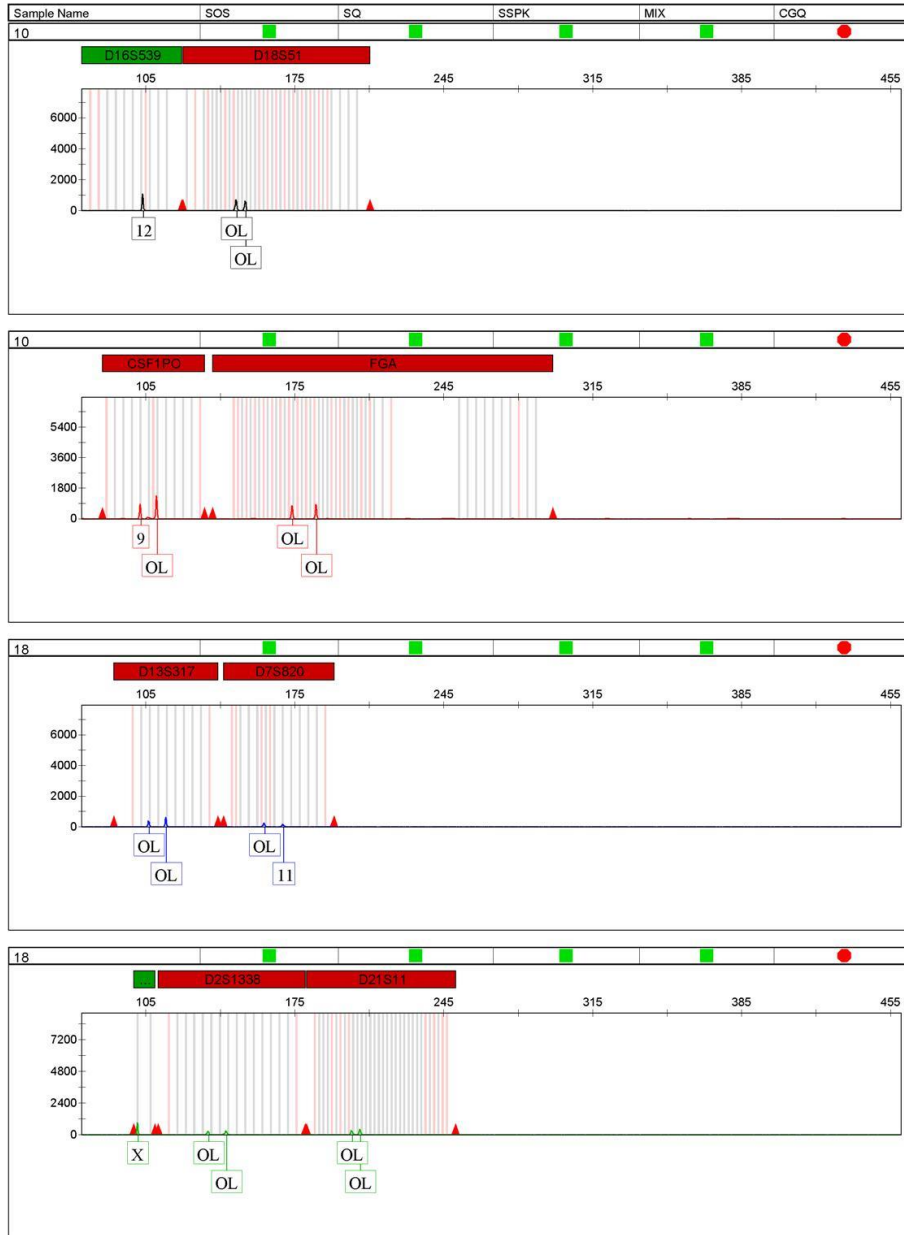

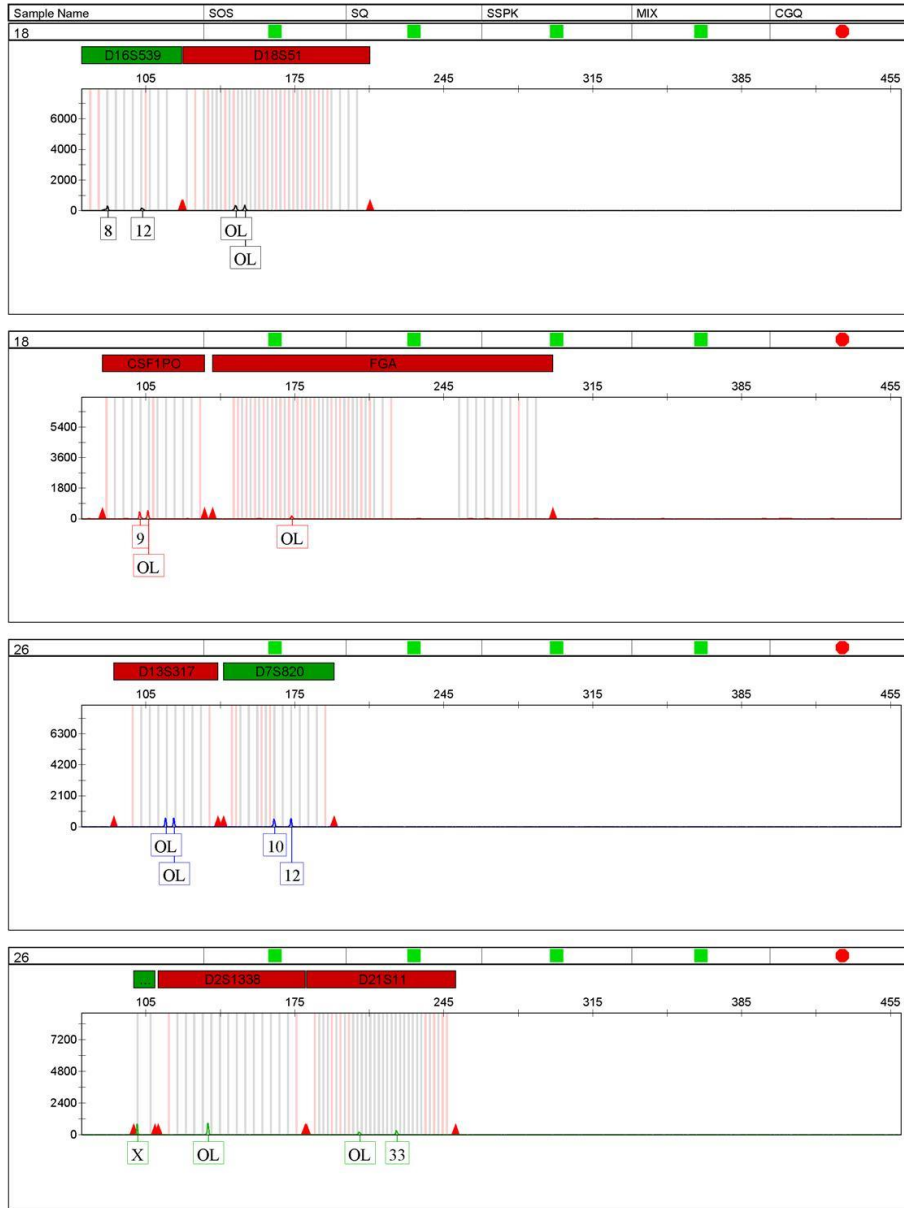



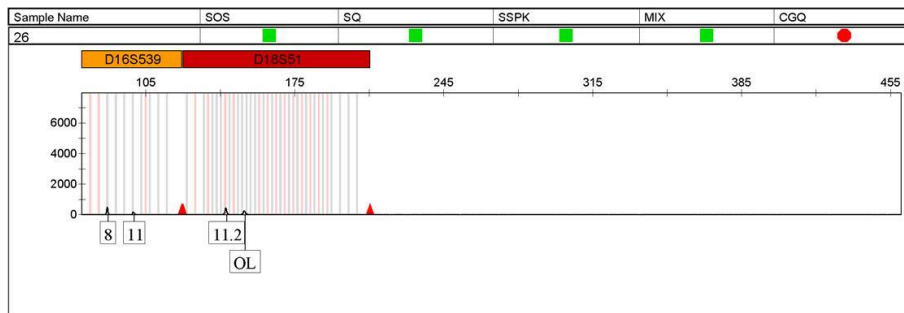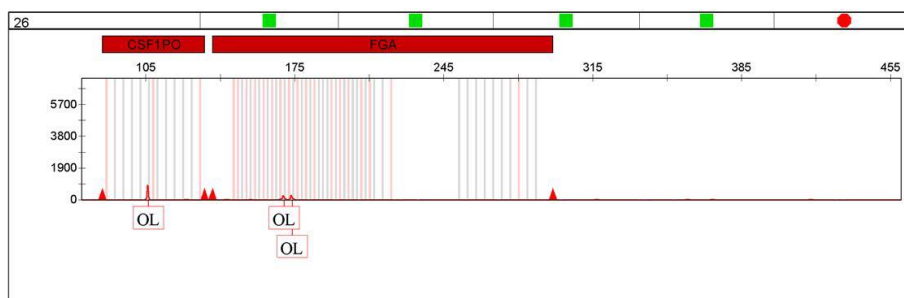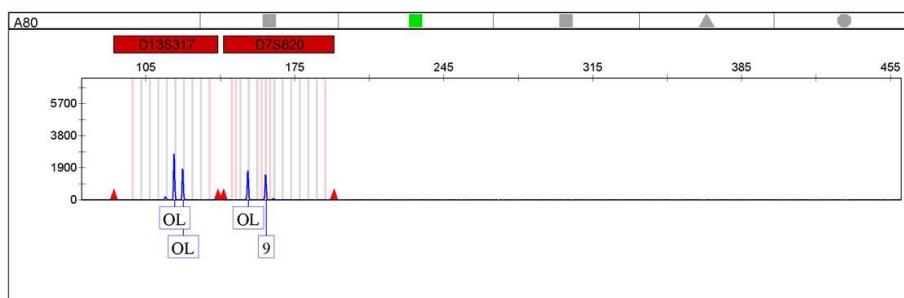

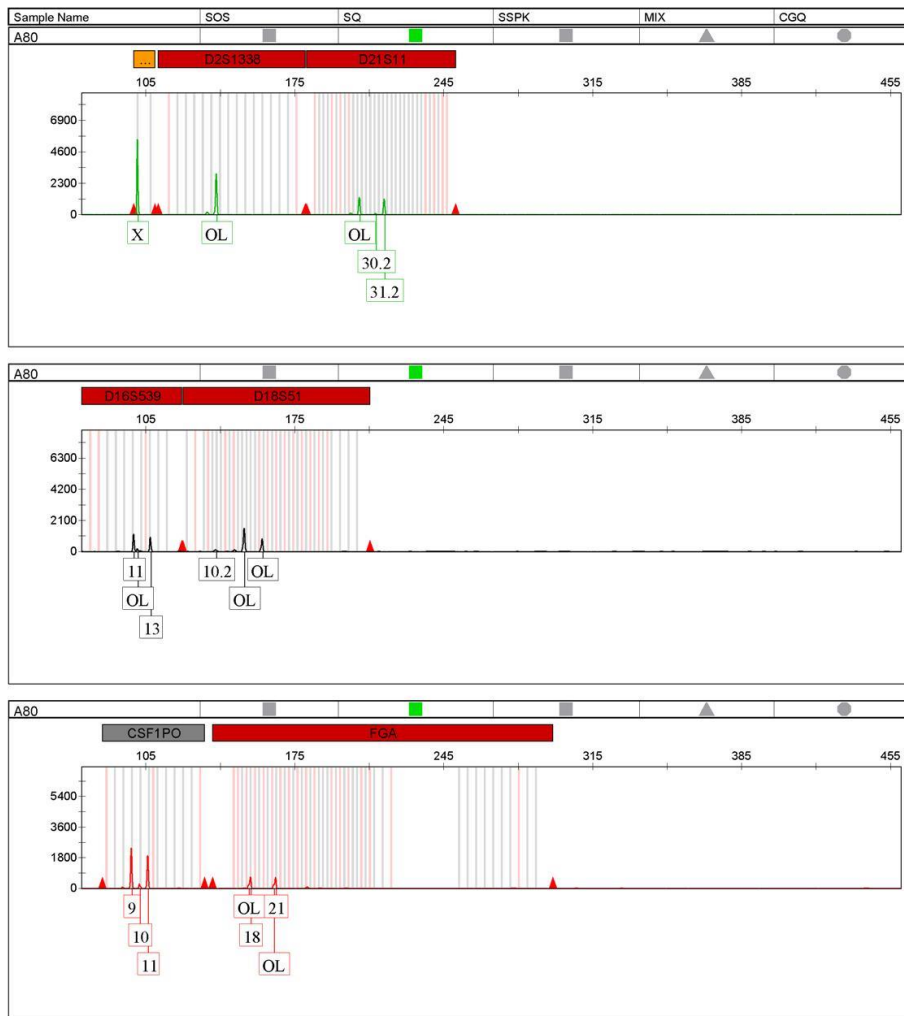

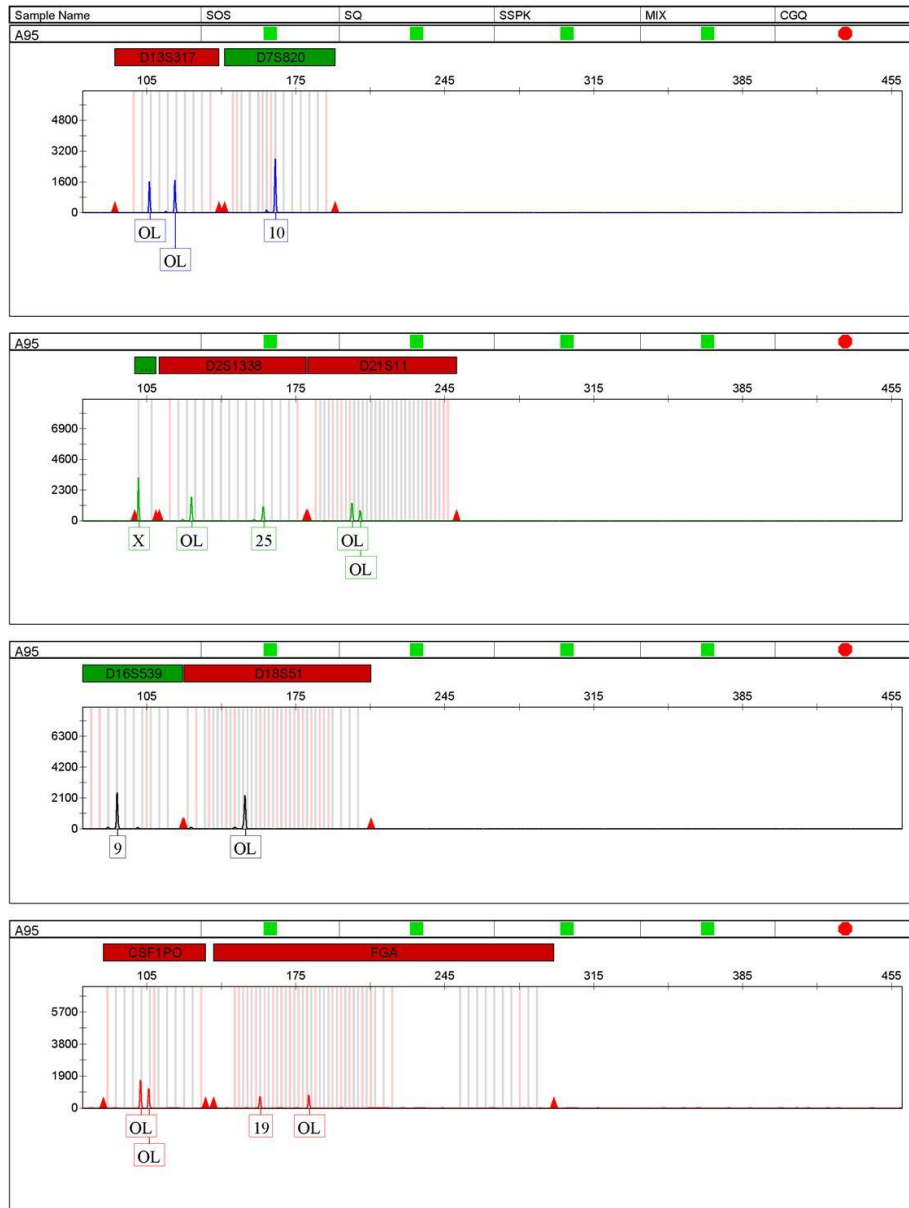

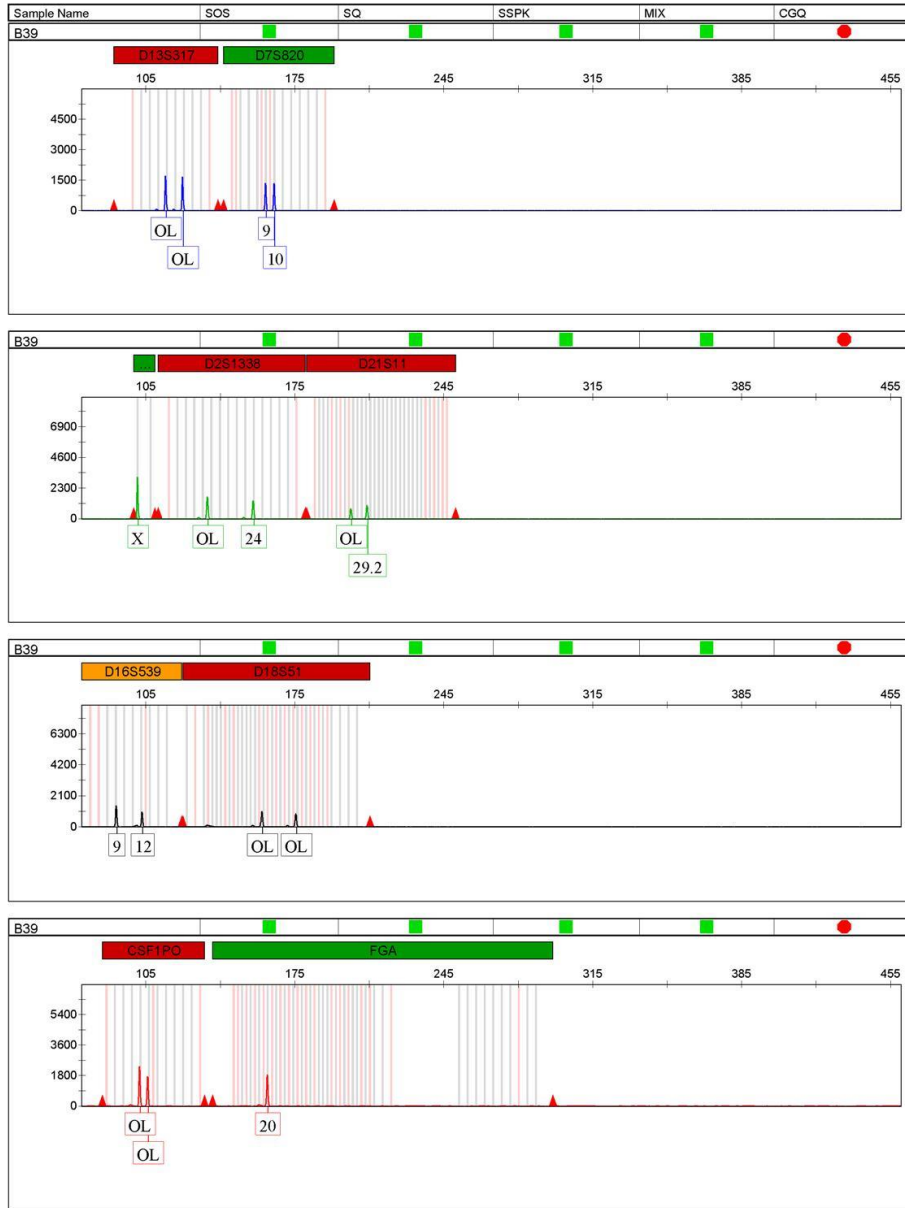

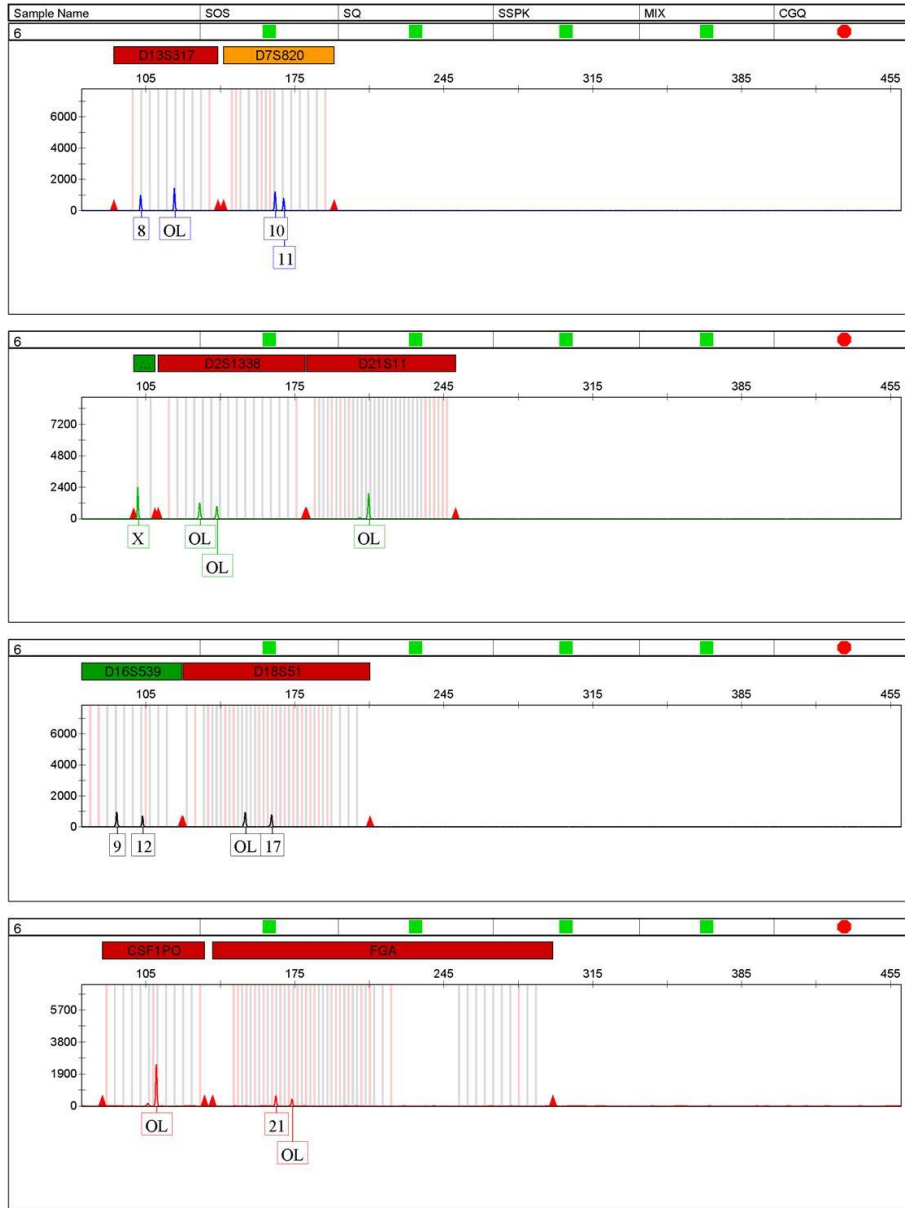

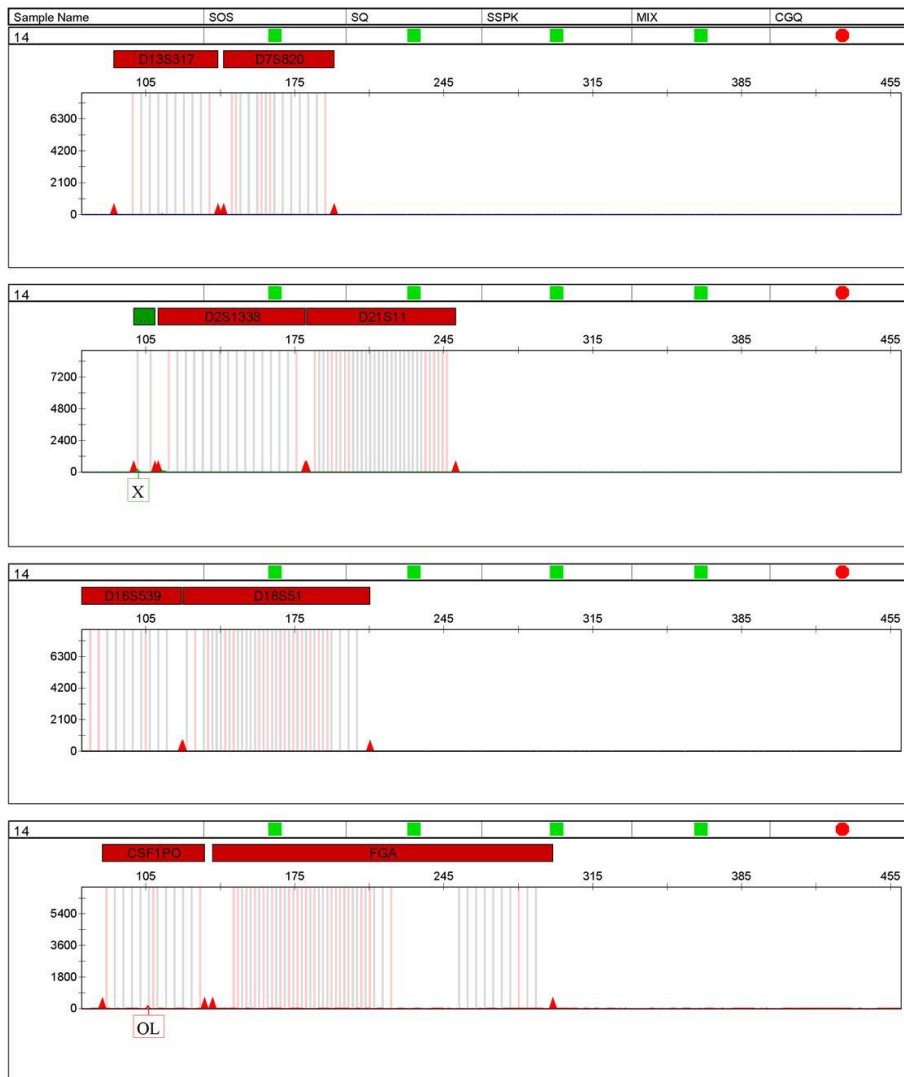

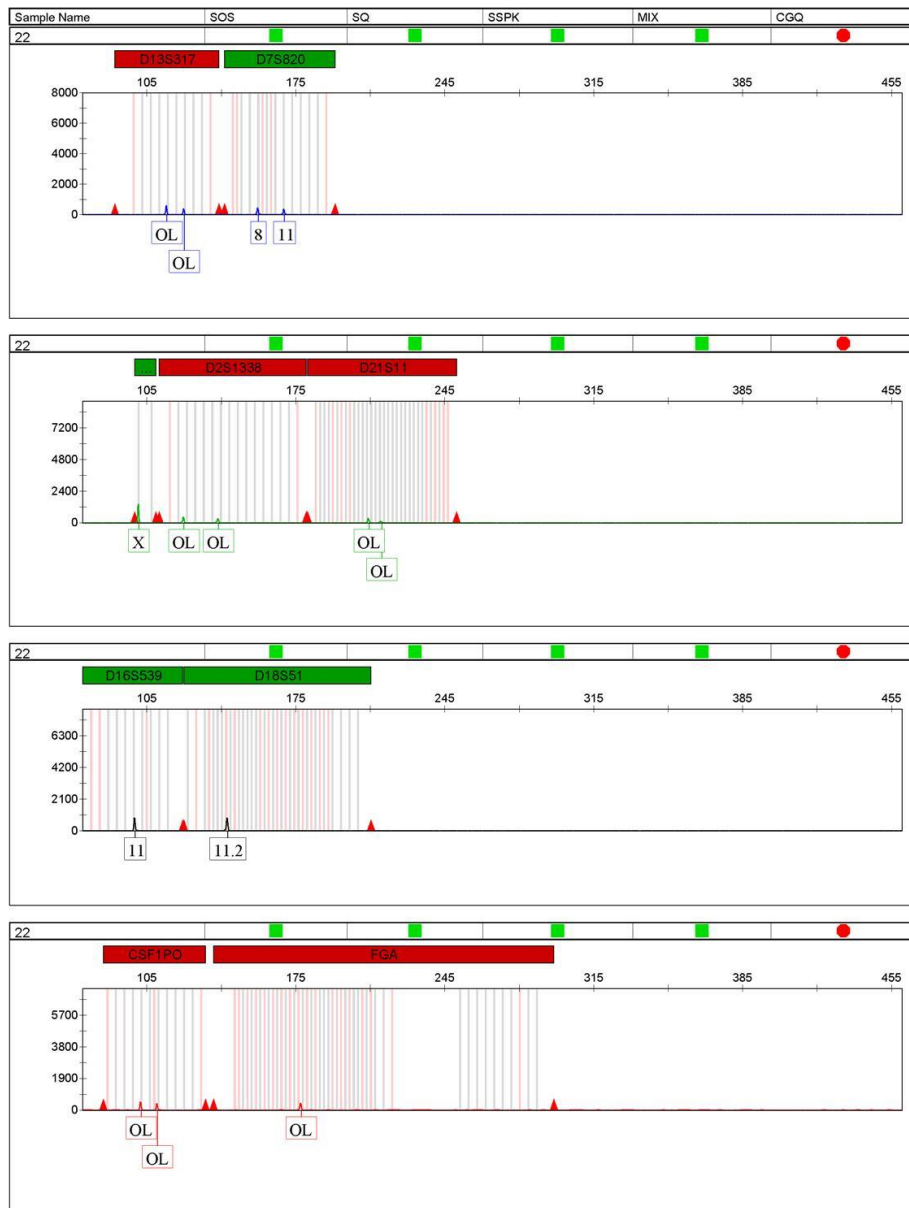

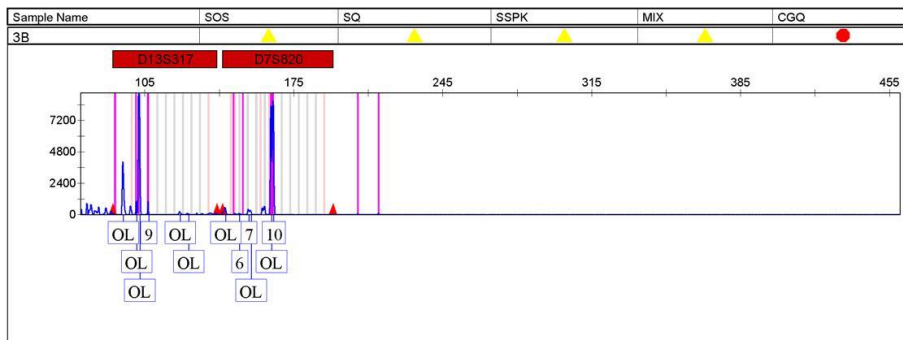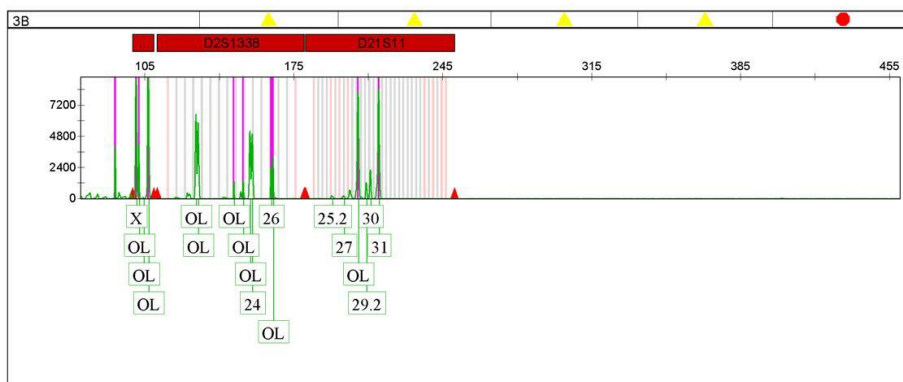



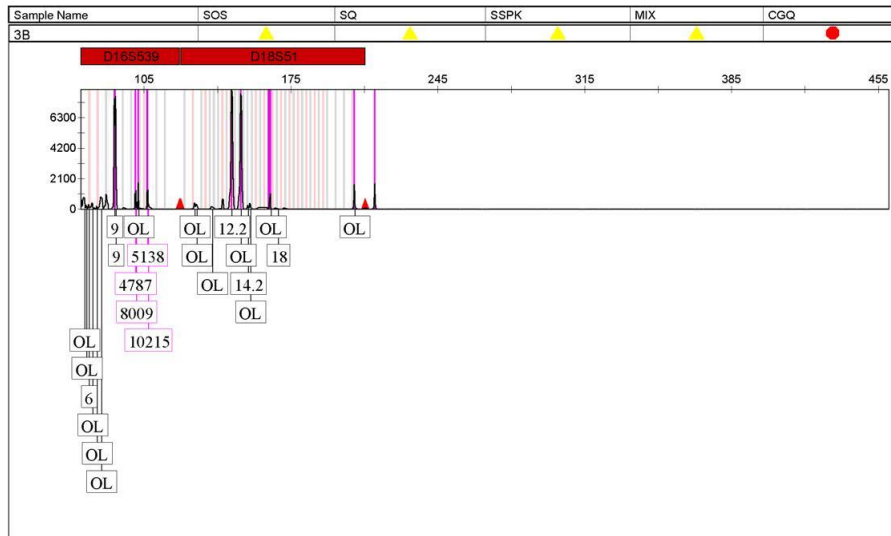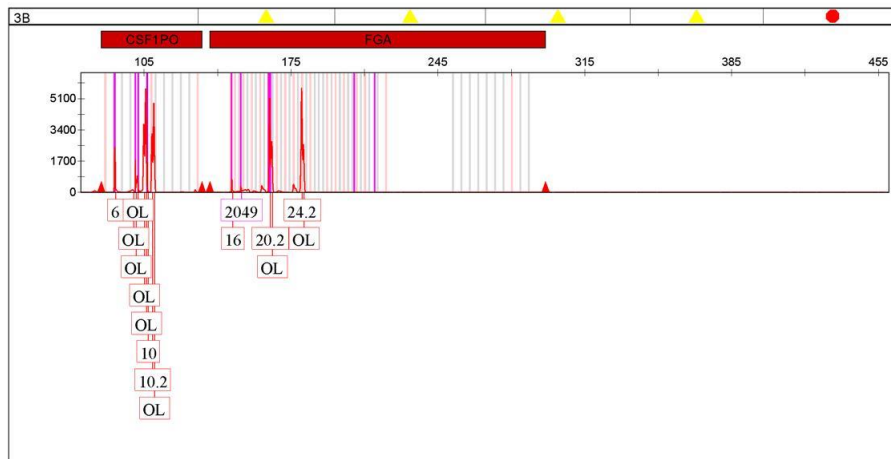

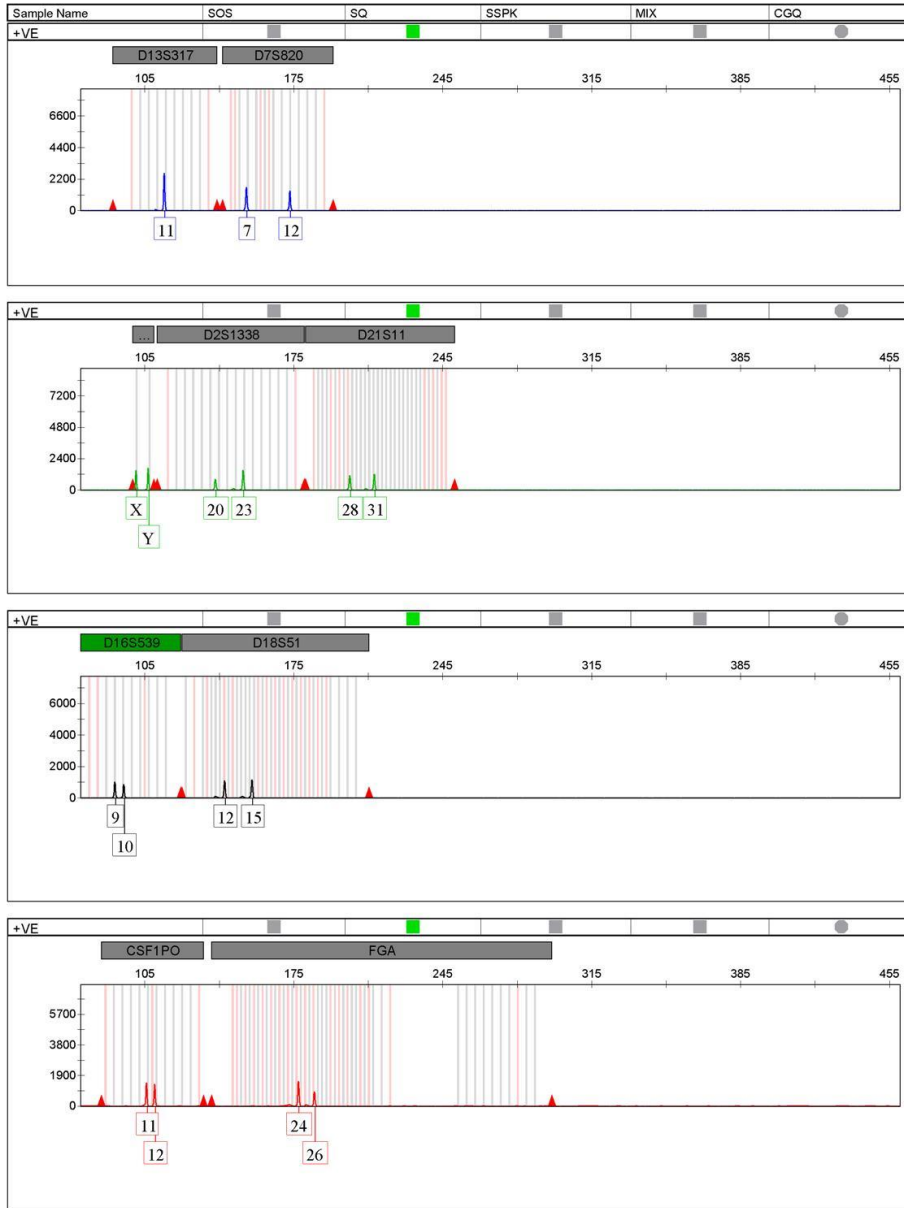

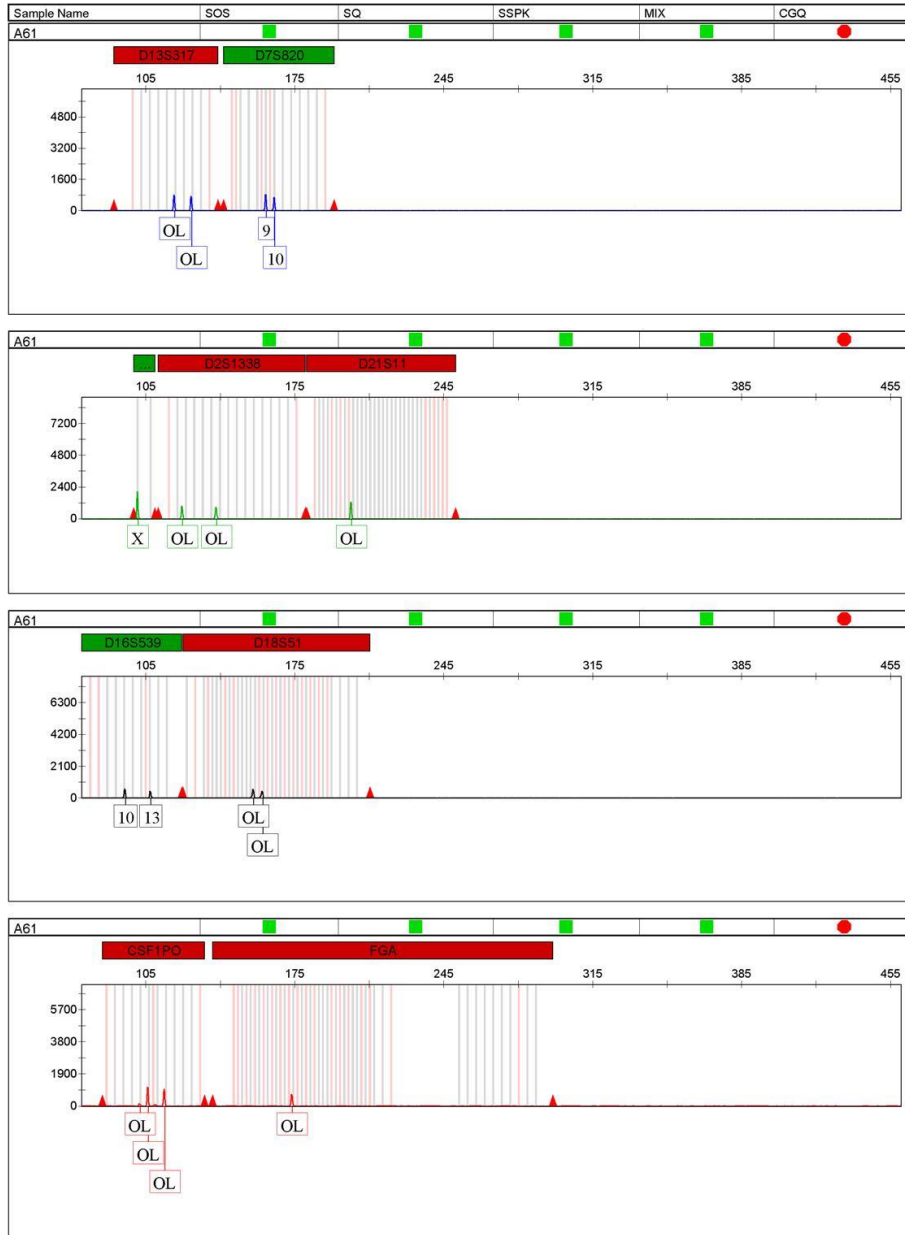

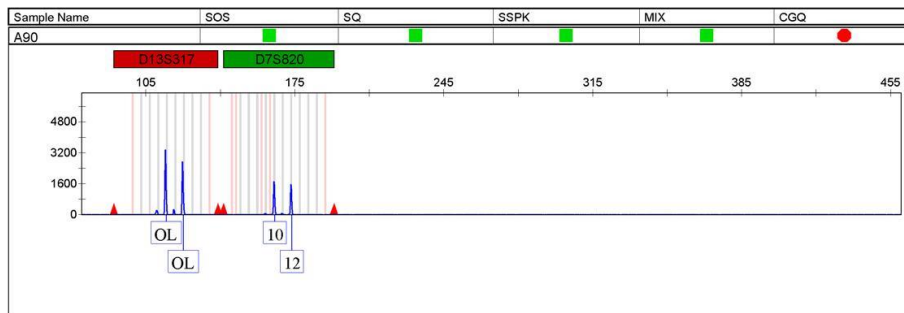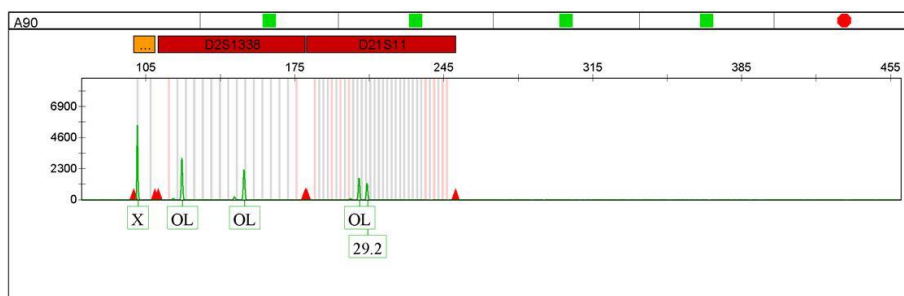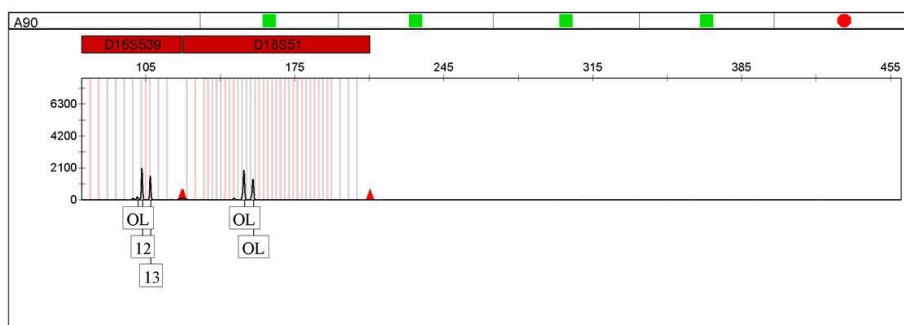

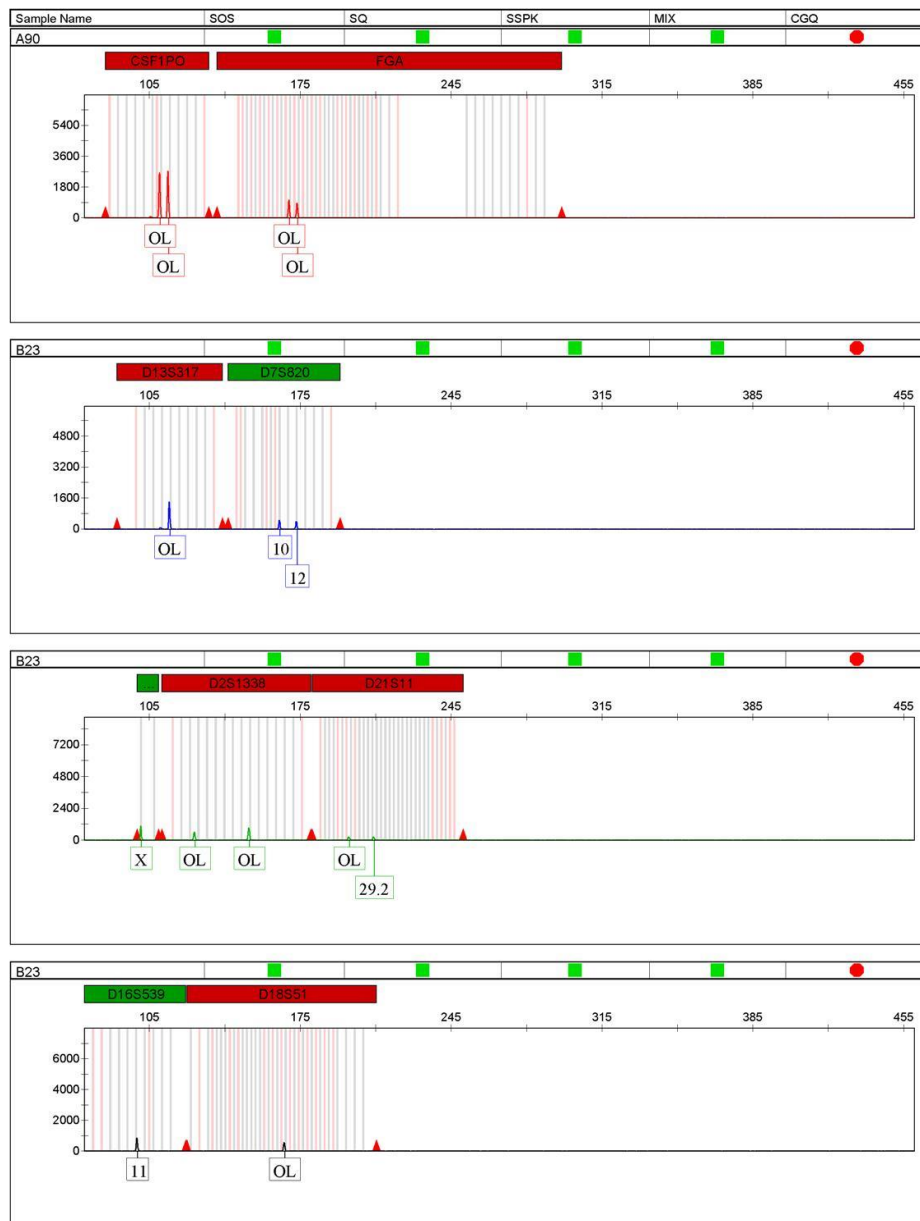

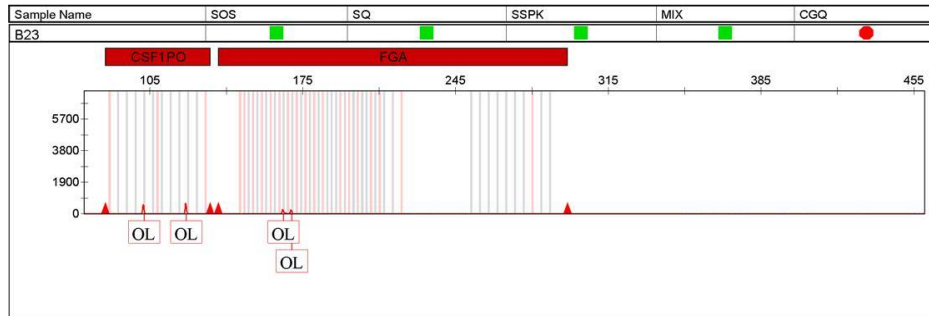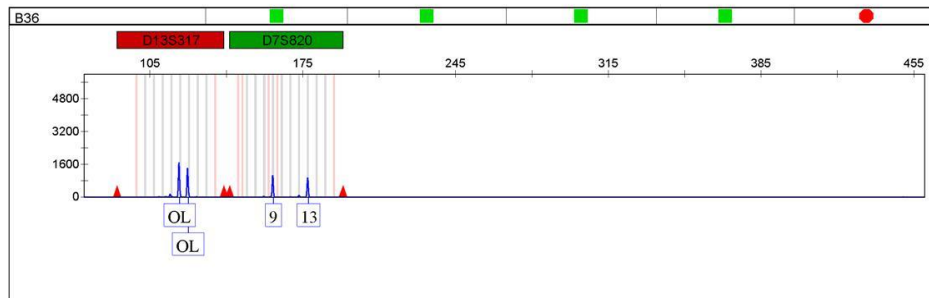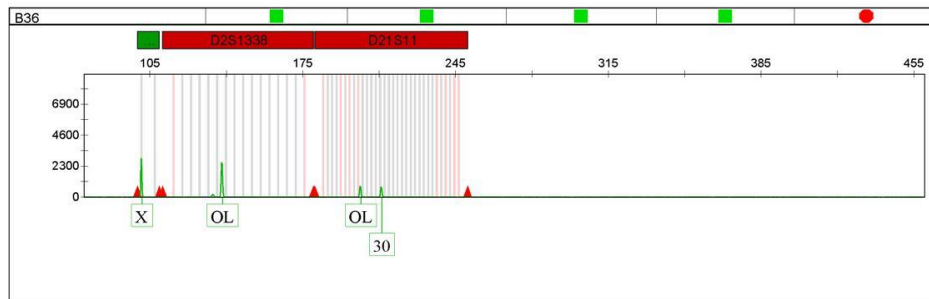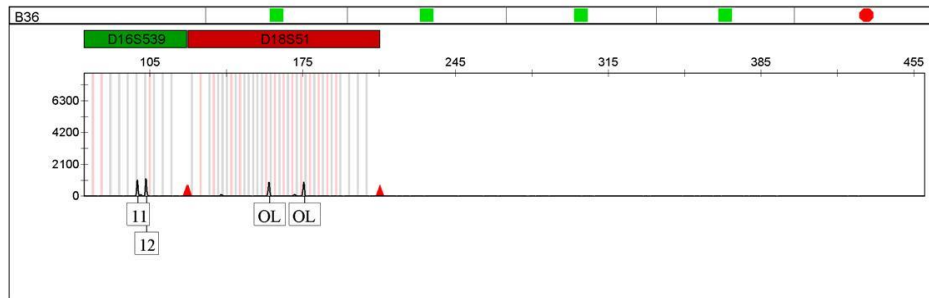

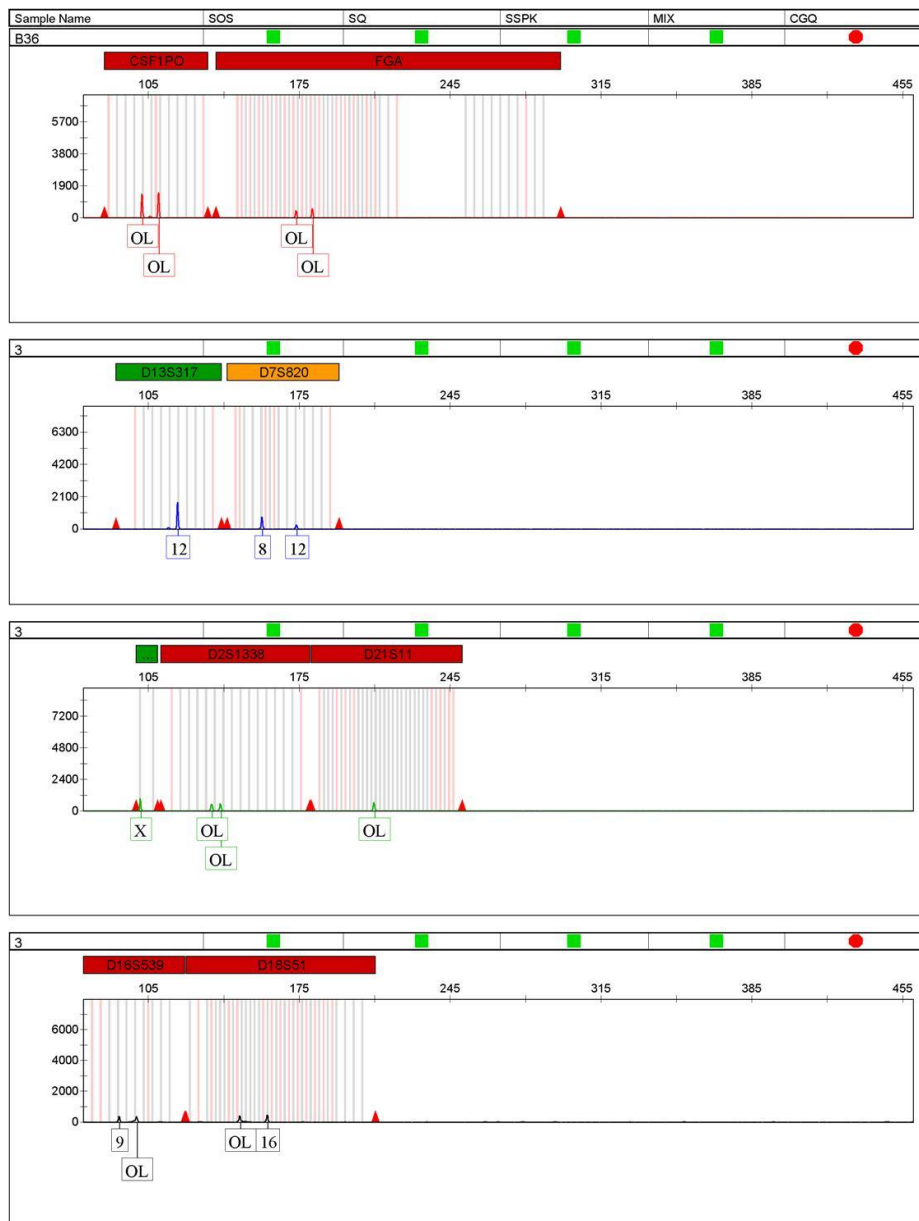

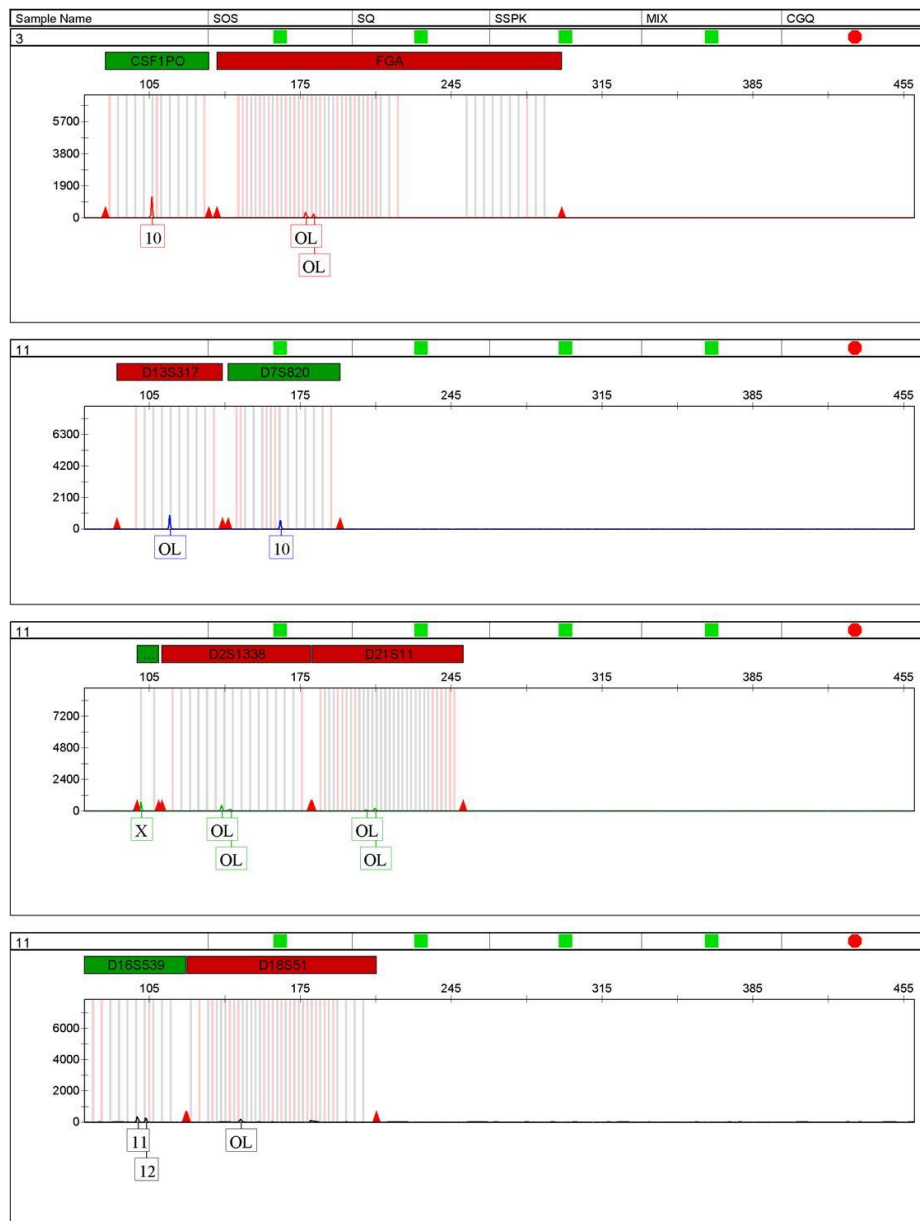



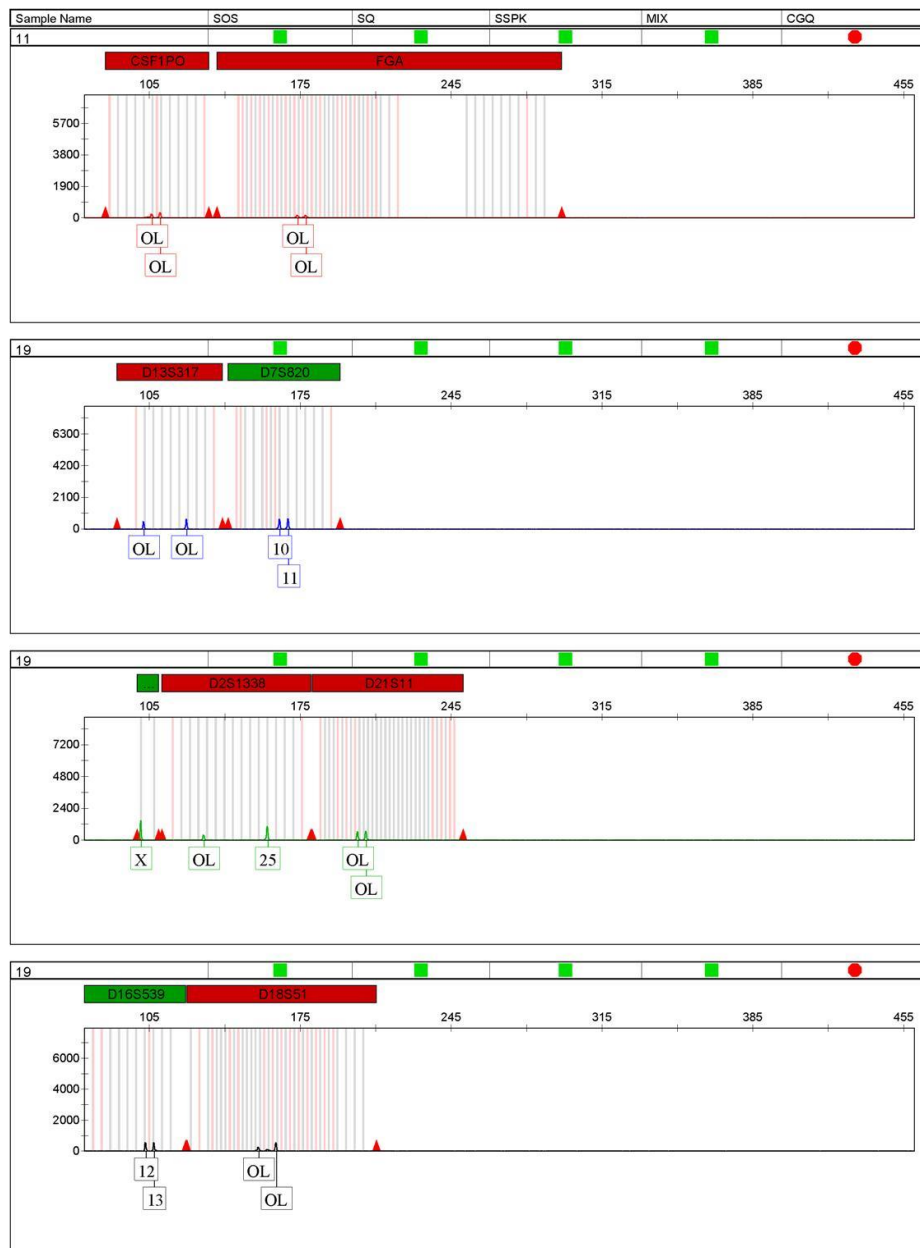

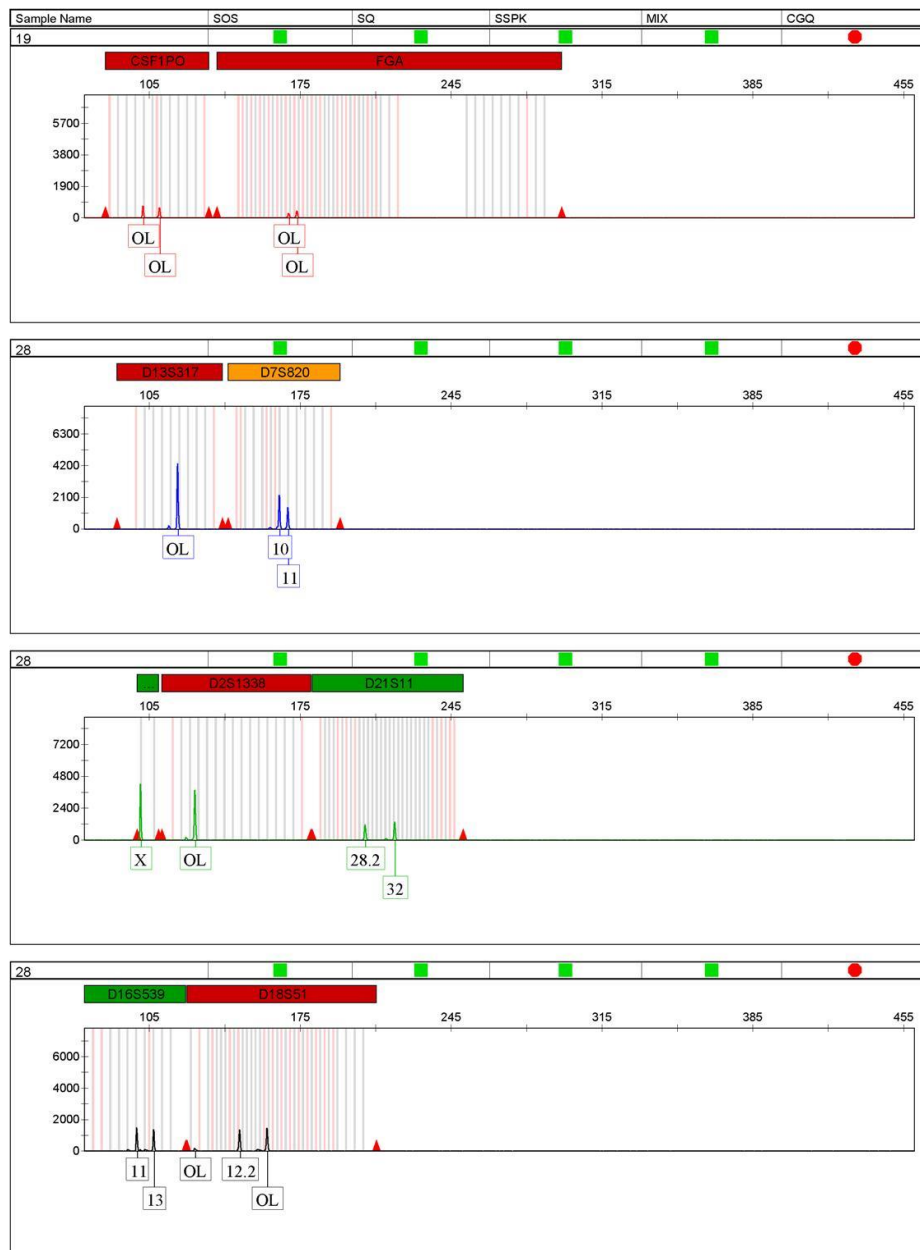

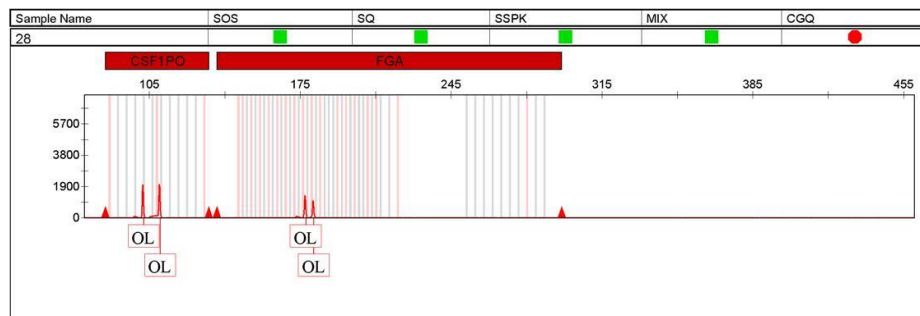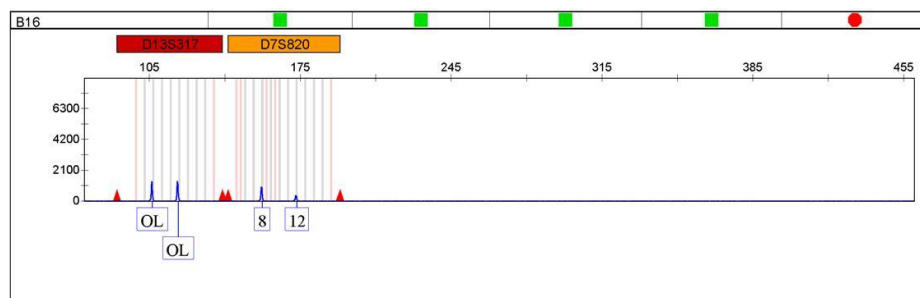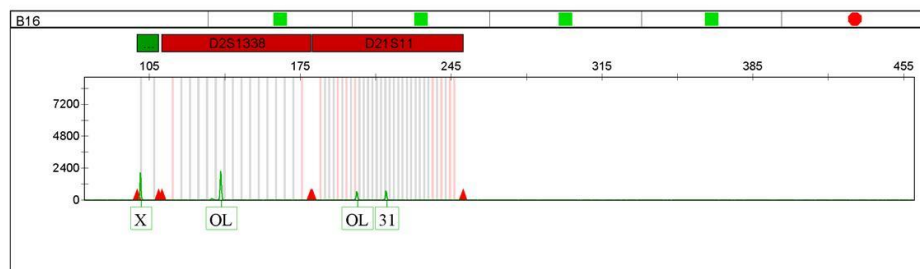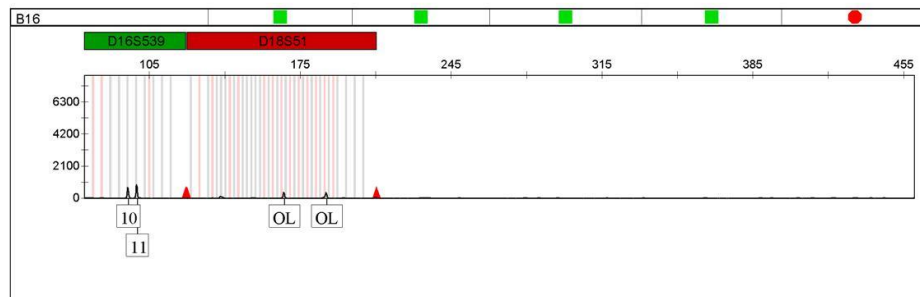

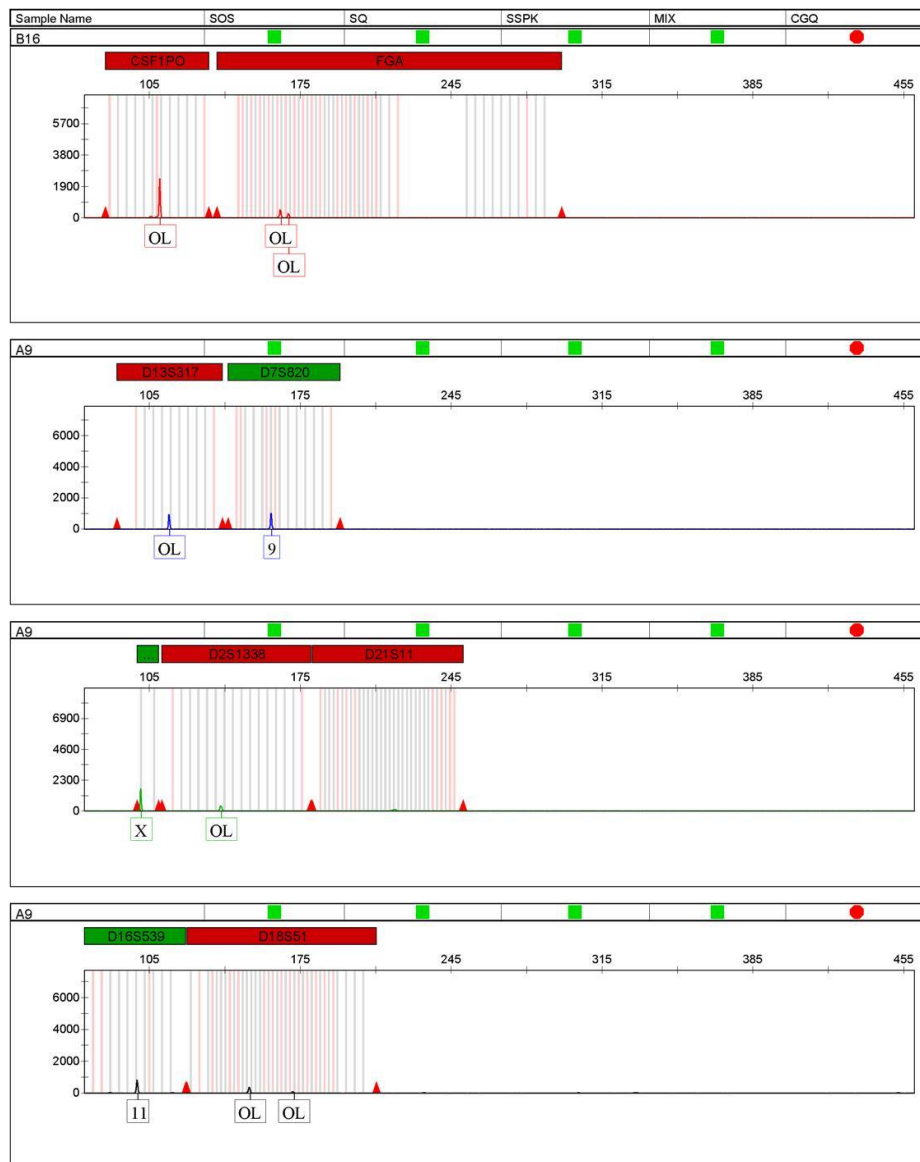

| Sample Name | SOS | SQ | SSPK | MIX | CGQ |
|-------------|-----|----|------|-----|-----|
|-------------|-----|----|------|-----|-----|

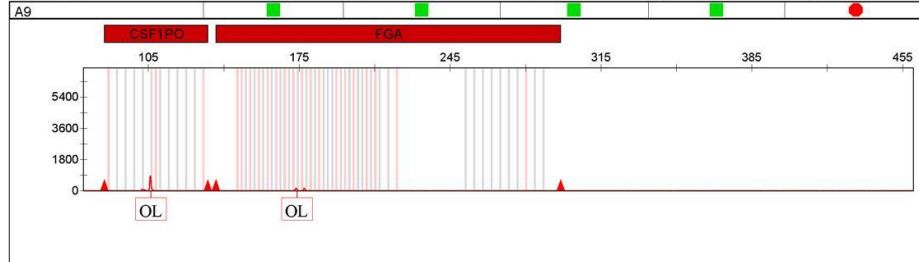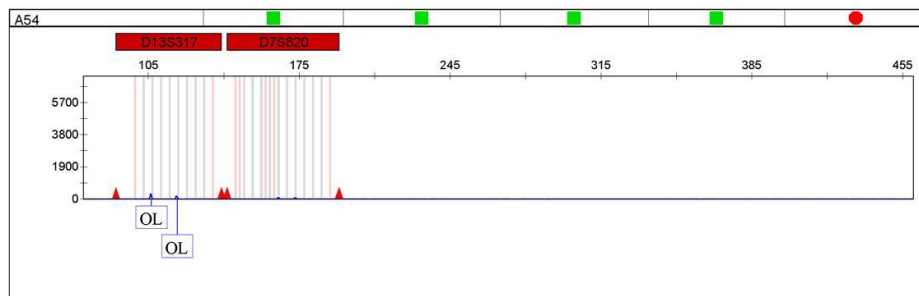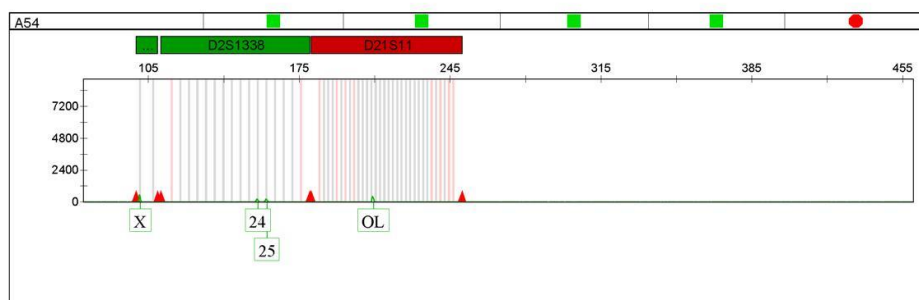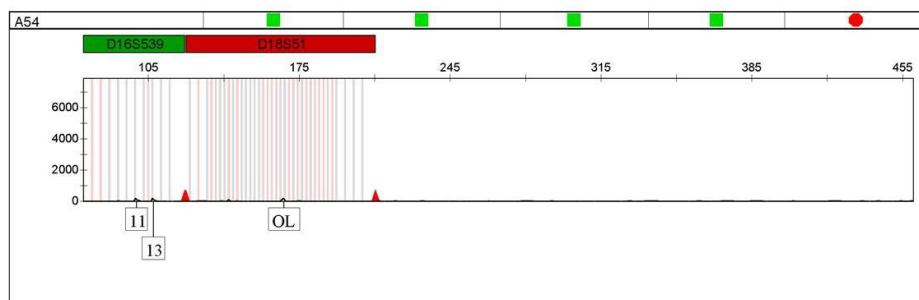

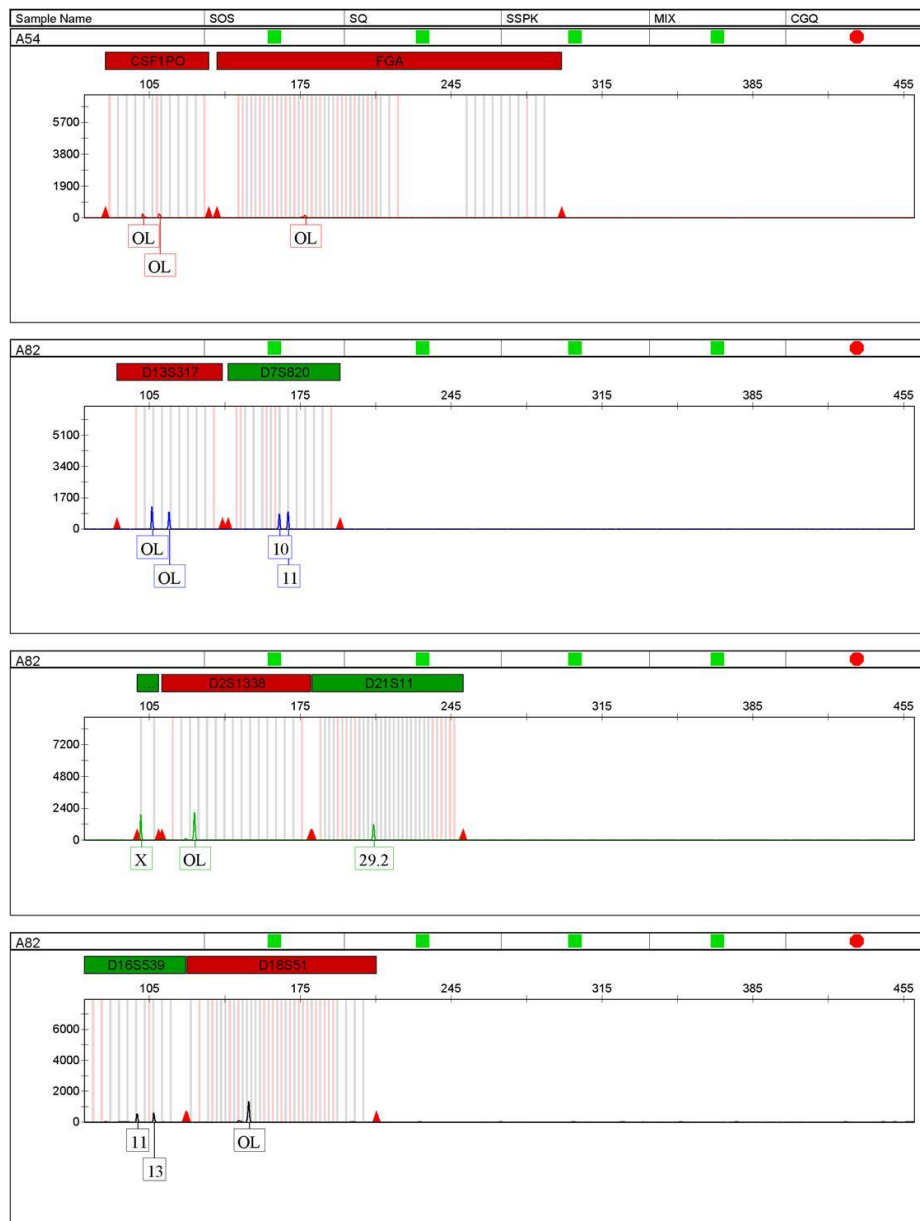

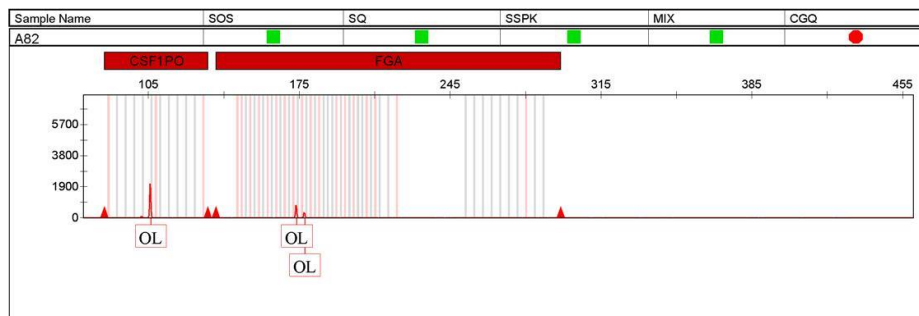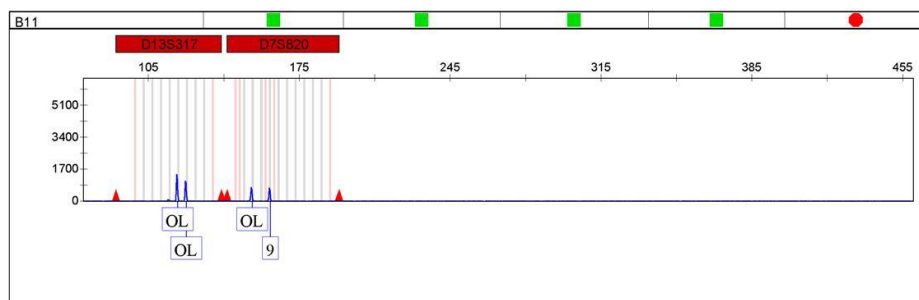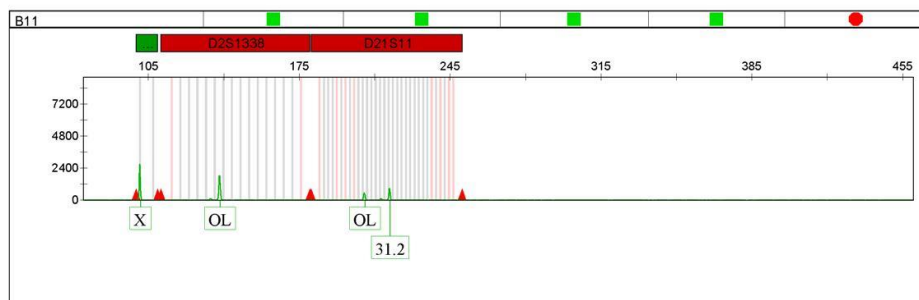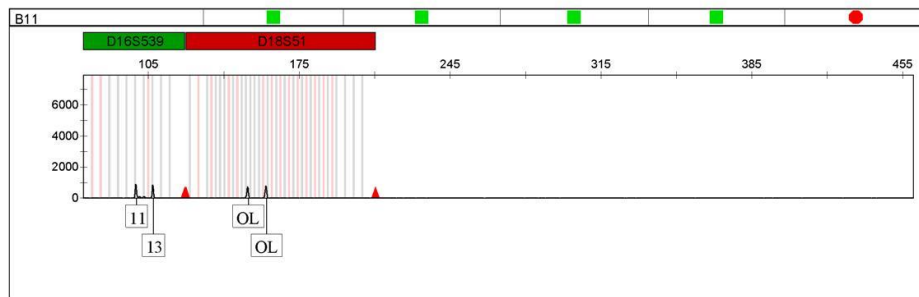

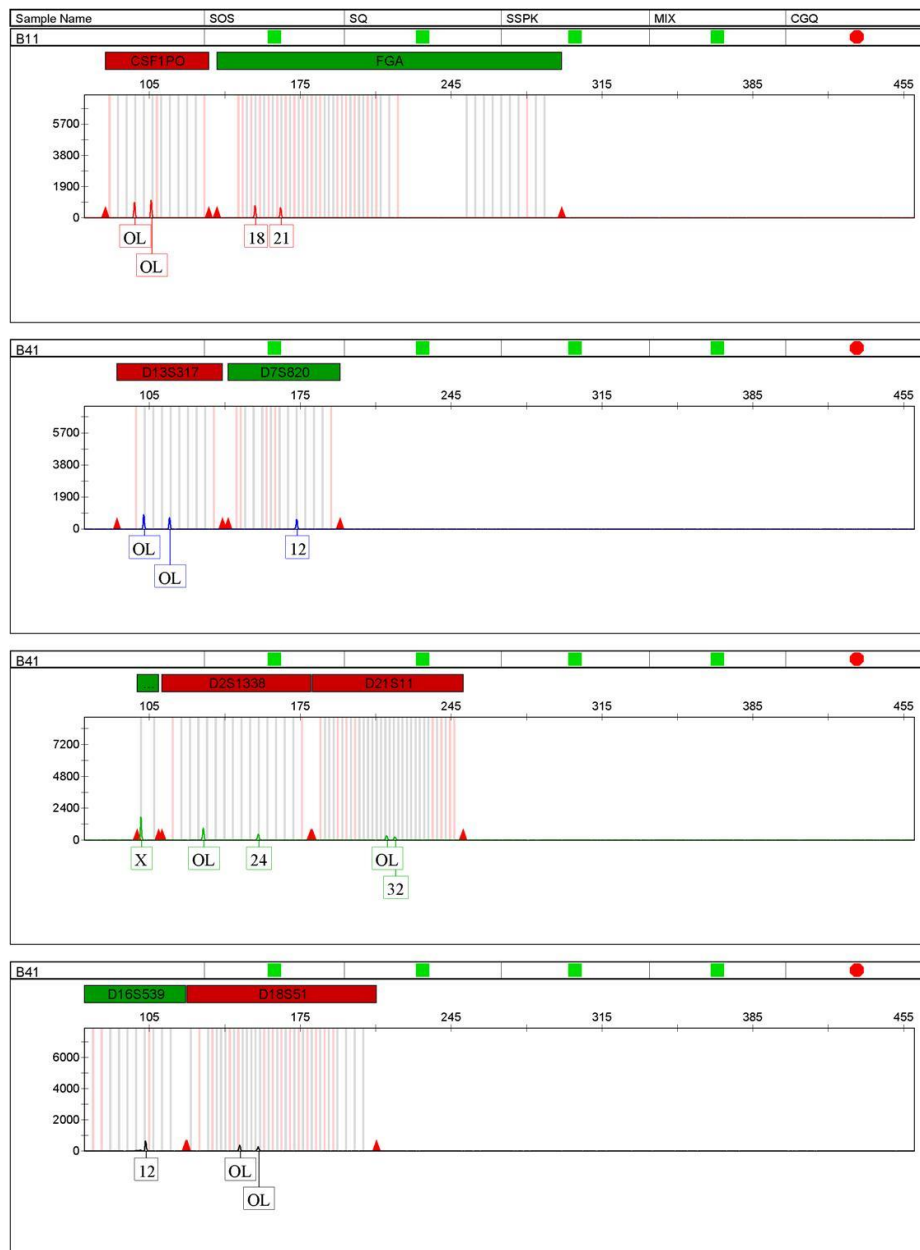



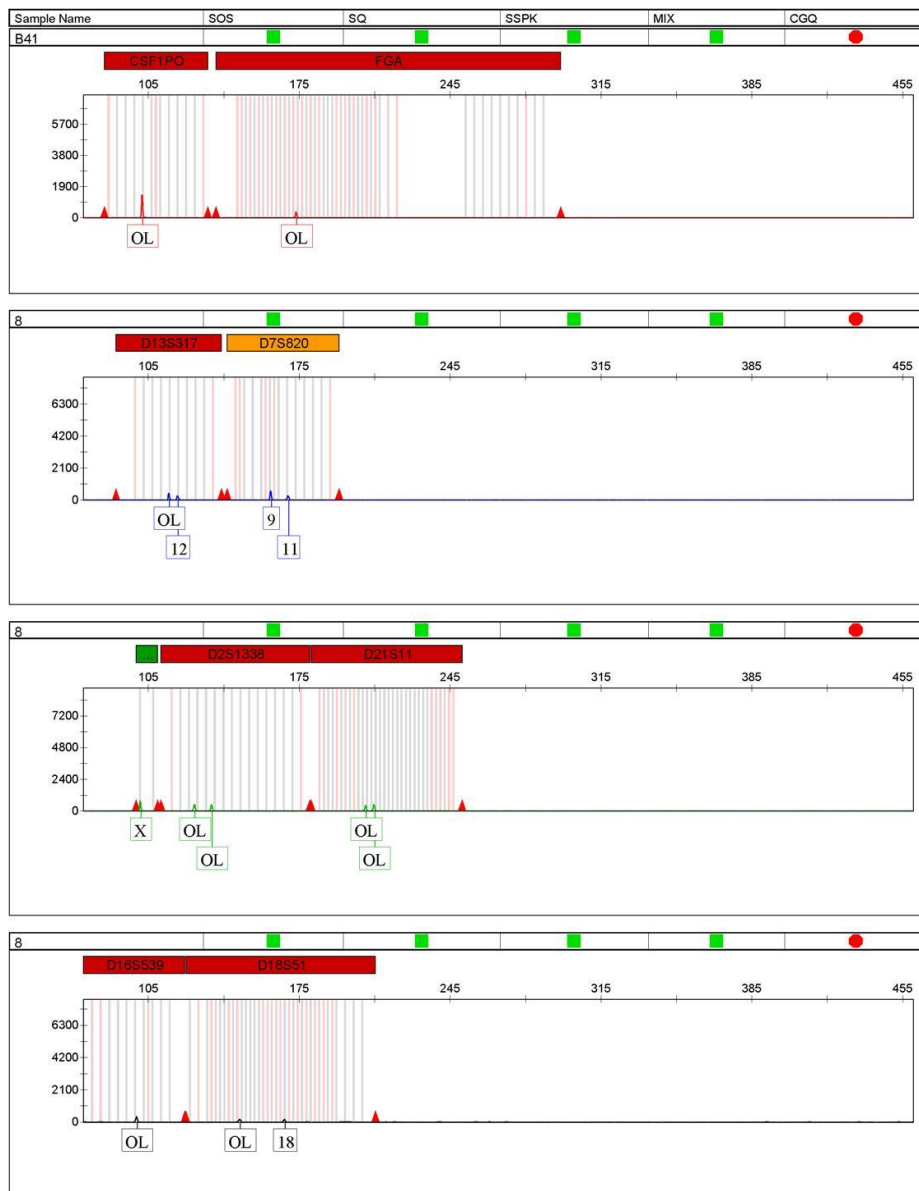

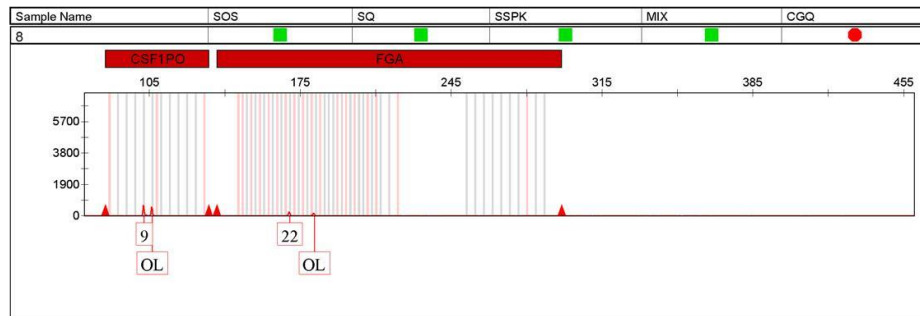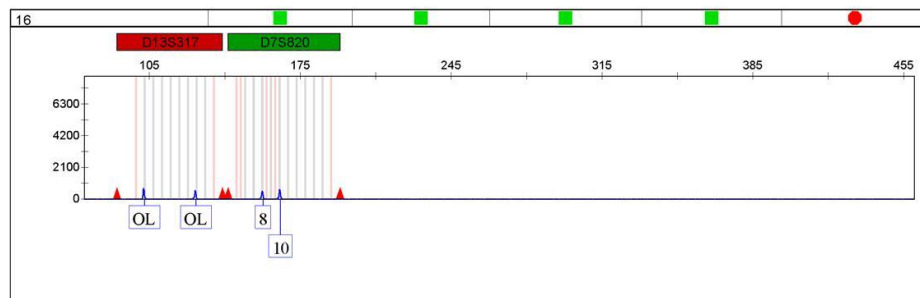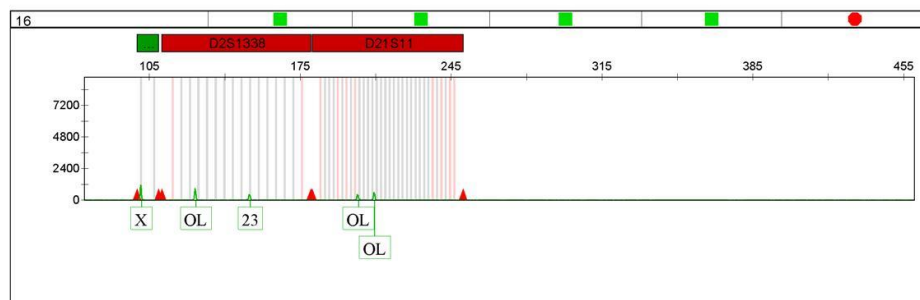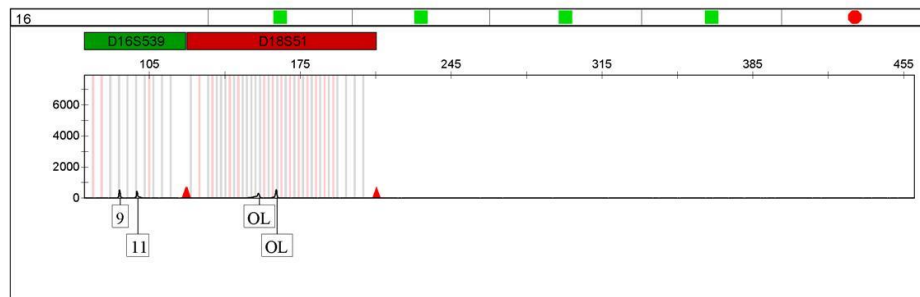

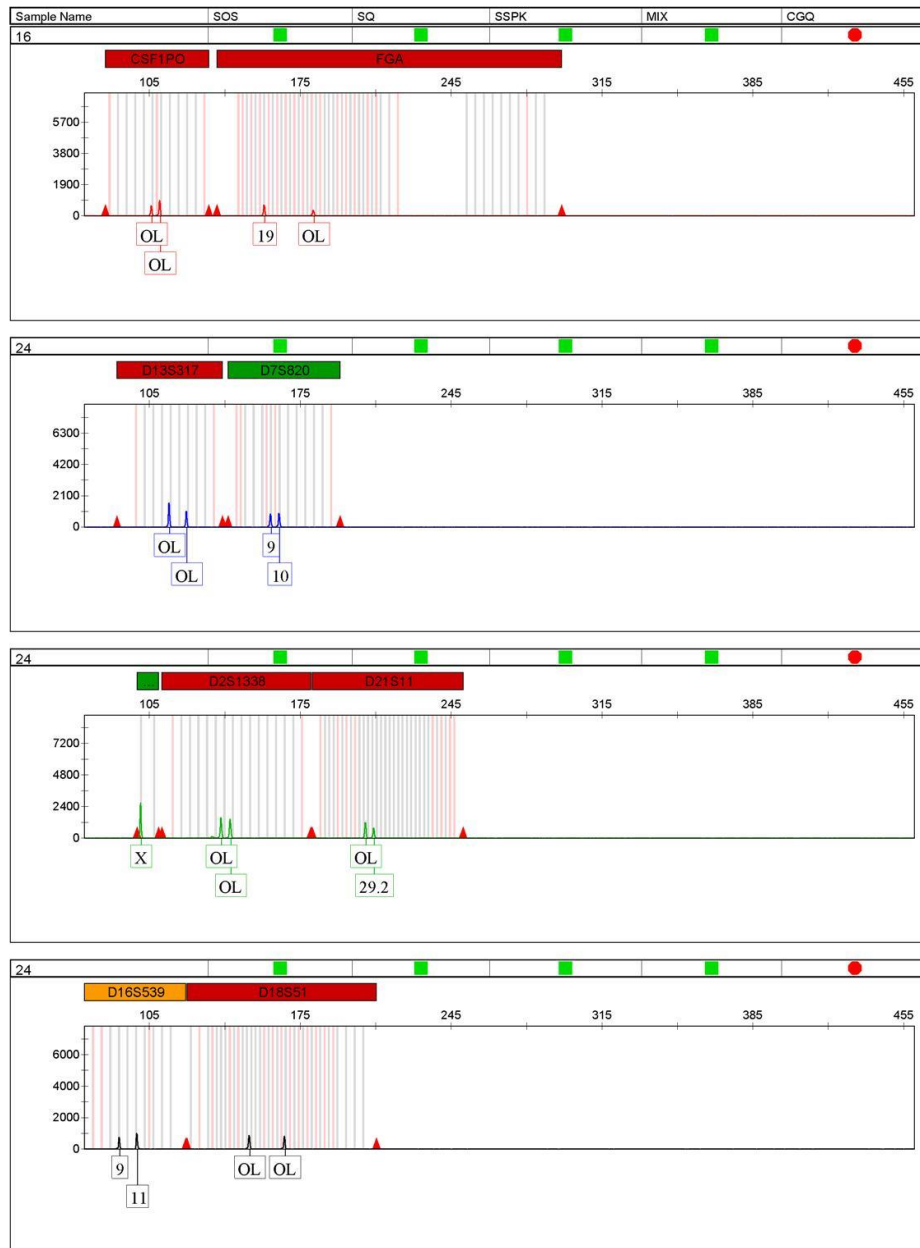

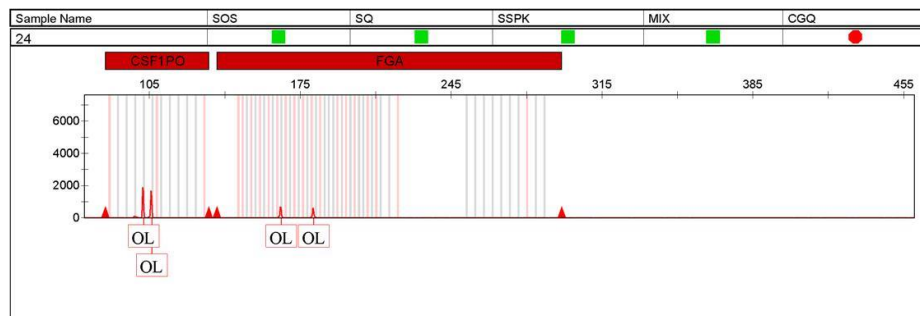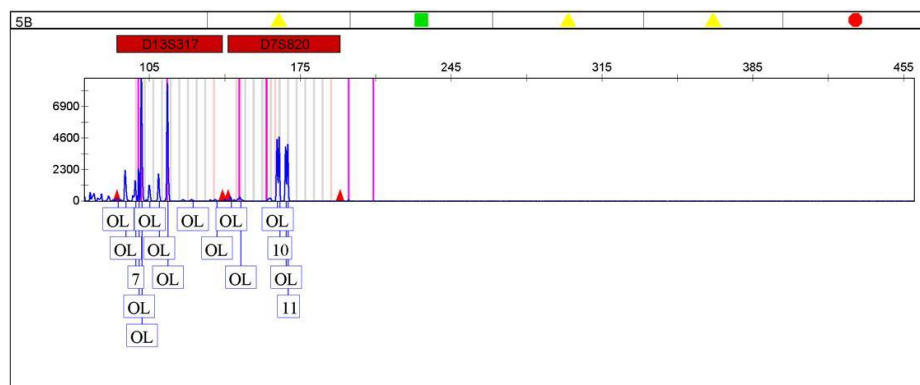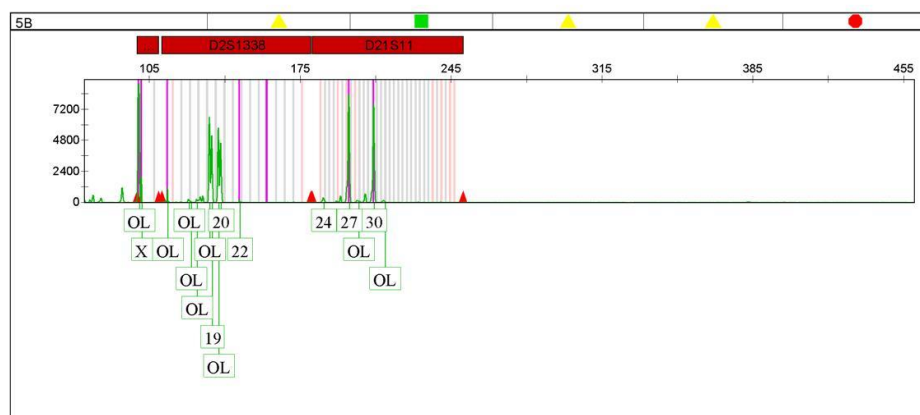

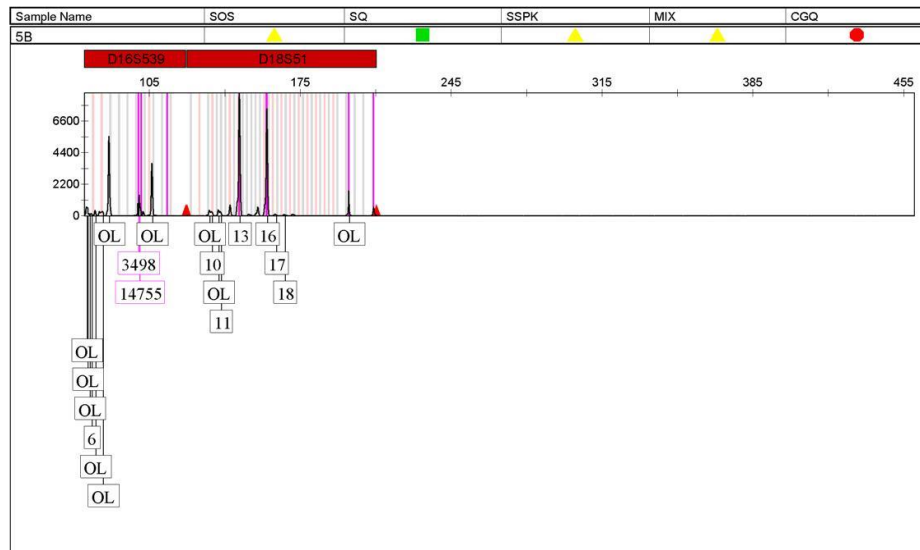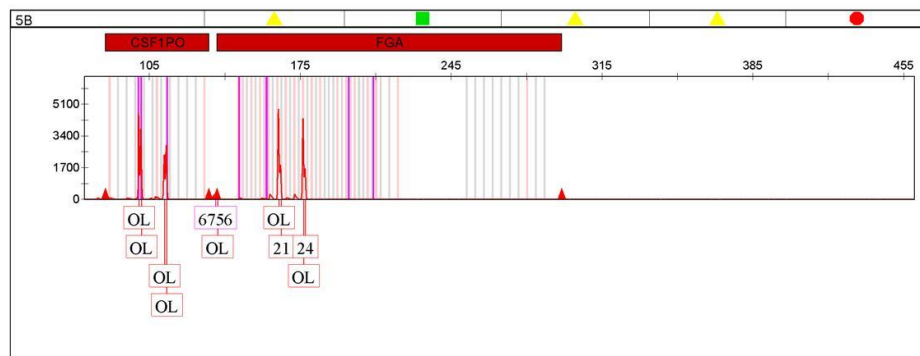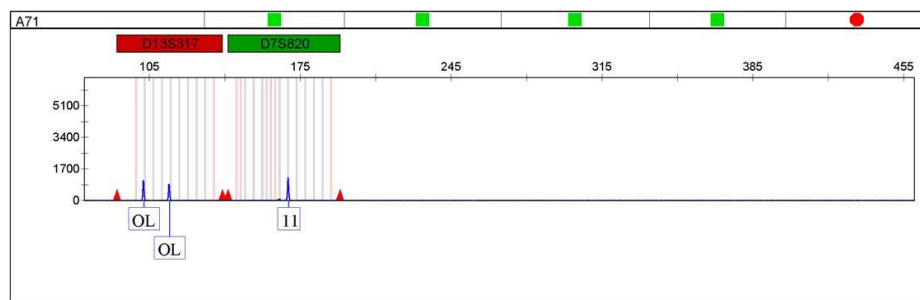

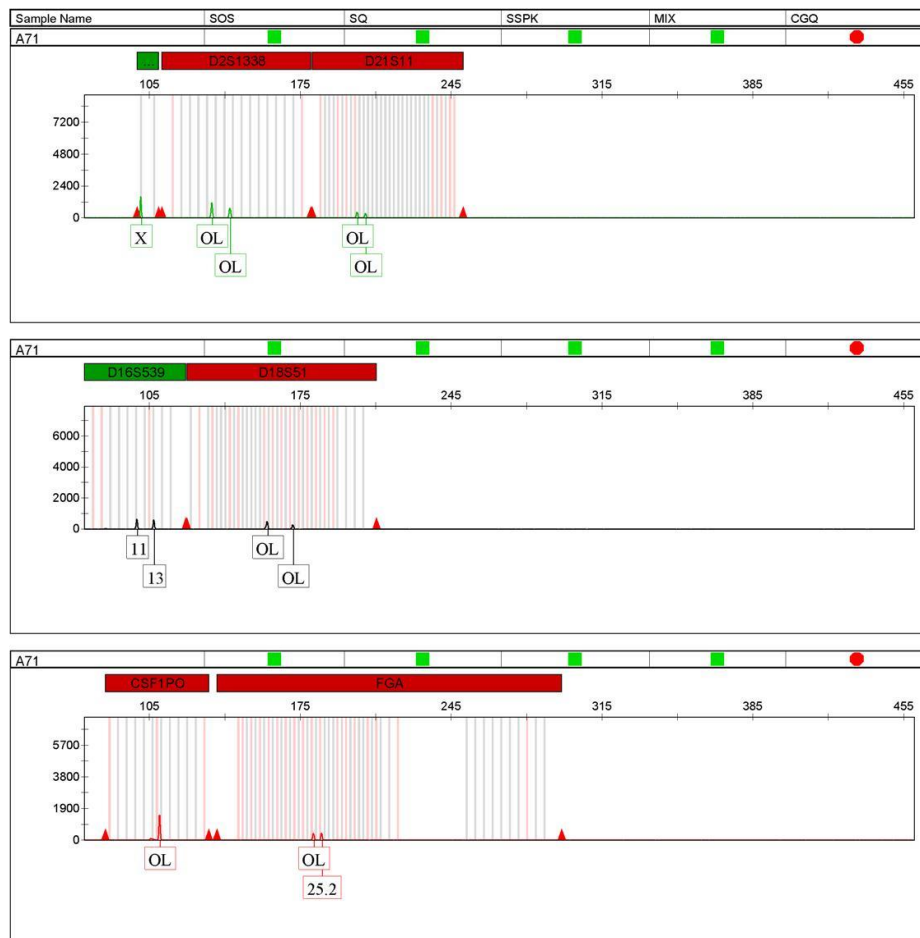

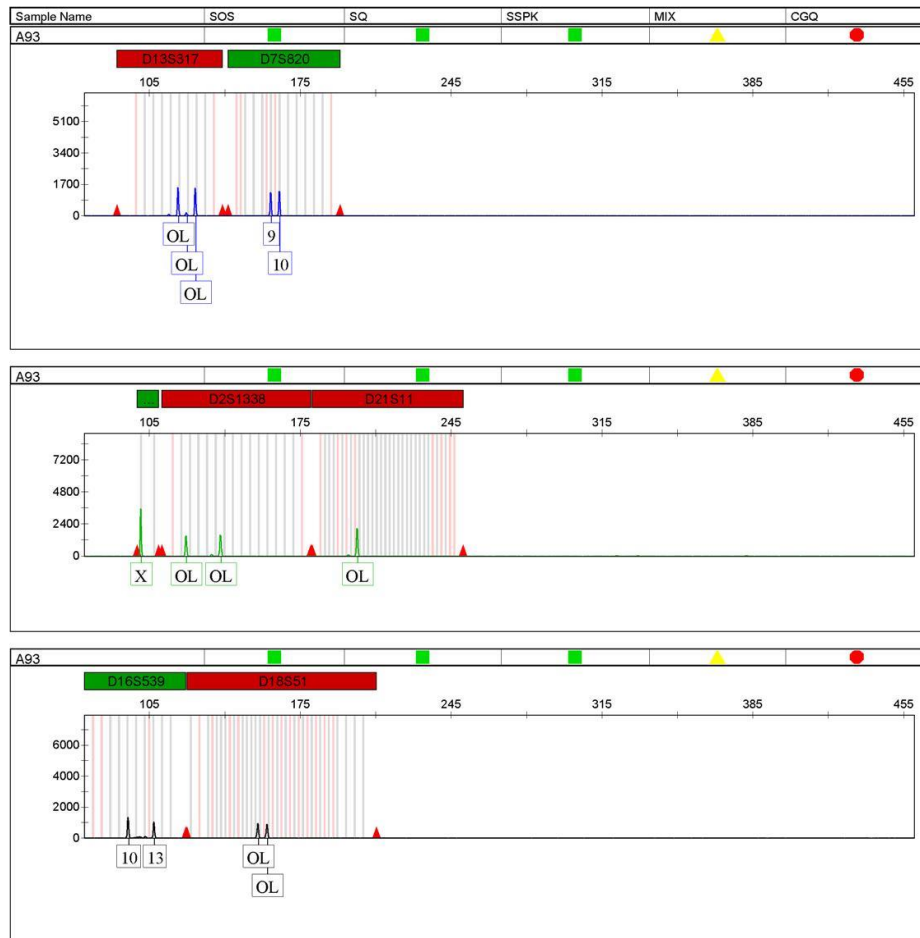

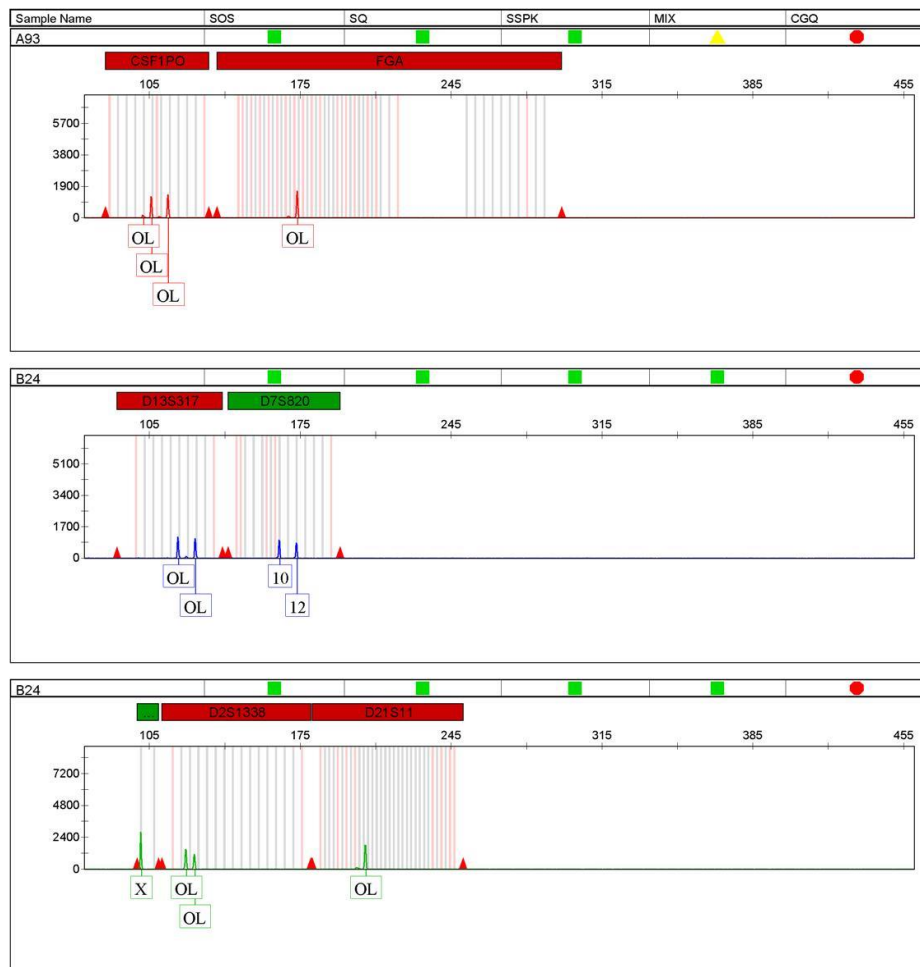



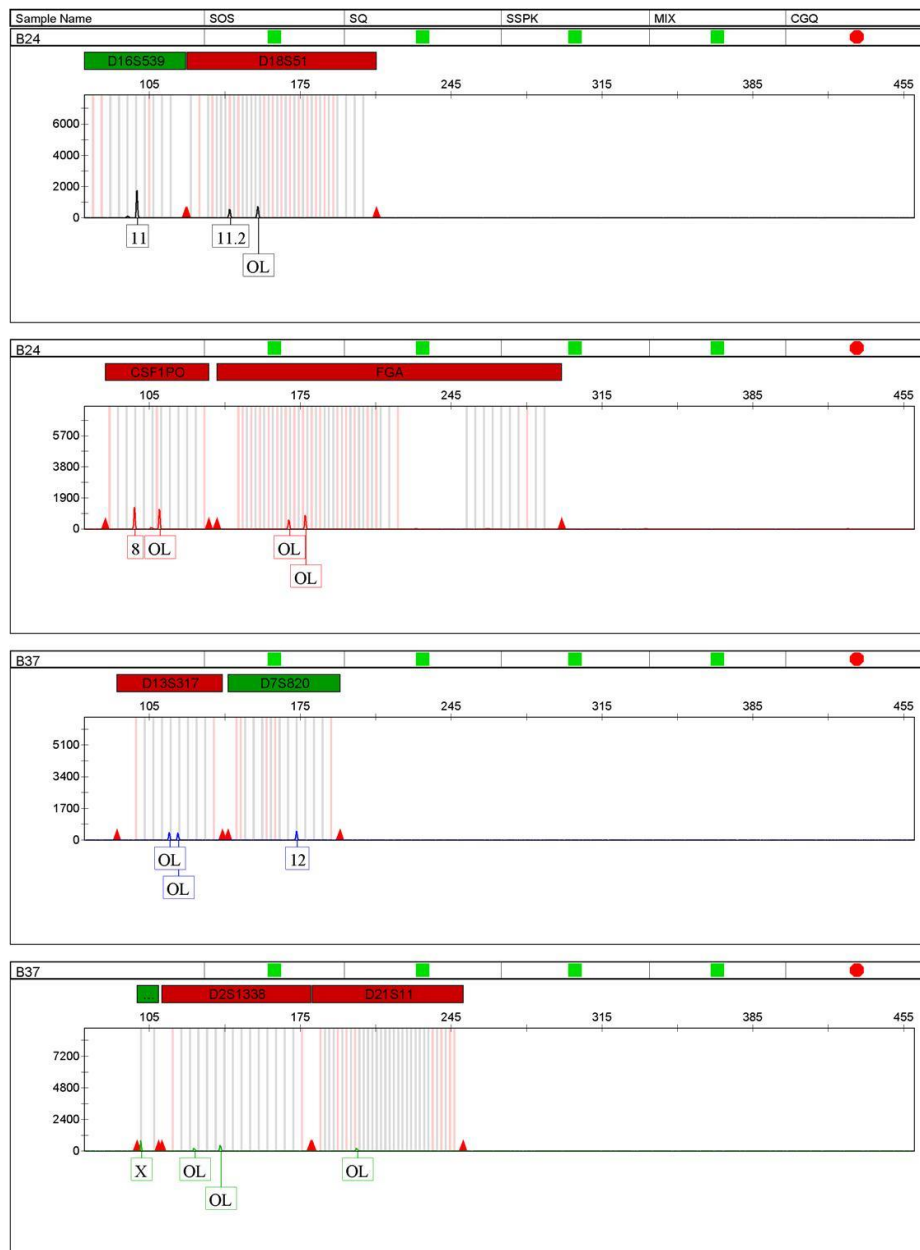

| Sample Name | SOS                                                                               | SQ                                                                                | SSPK                                                                              | MIX                                                                                 | CGQ                                                                                 |
|-------------|-----------------------------------------------------------------------------------|-----------------------------------------------------------------------------------|-----------------------------------------------------------------------------------|-------------------------------------------------------------------------------------|-------------------------------------------------------------------------------------|
| B37         |  |  |  |  |  |

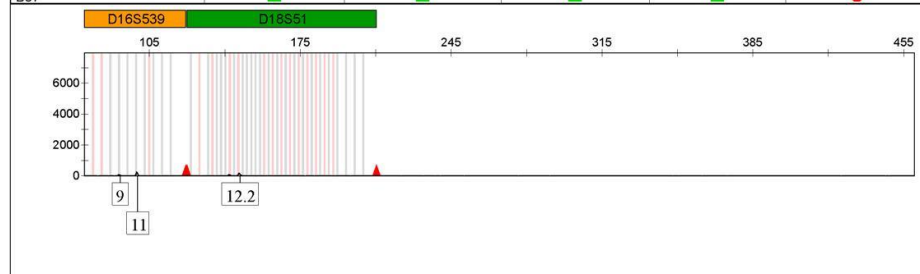

| Sample Name | SOS                                                                               | SQ                                                                                | SSPK                                                                              | MIX                                                                                 | CGQ                                                                                 |
|-------------|-----------------------------------------------------------------------------------|-----------------------------------------------------------------------------------|-----------------------------------------------------------------------------------|-------------------------------------------------------------------------------------|-------------------------------------------------------------------------------------|
| B37         |  |  |  |  |  |

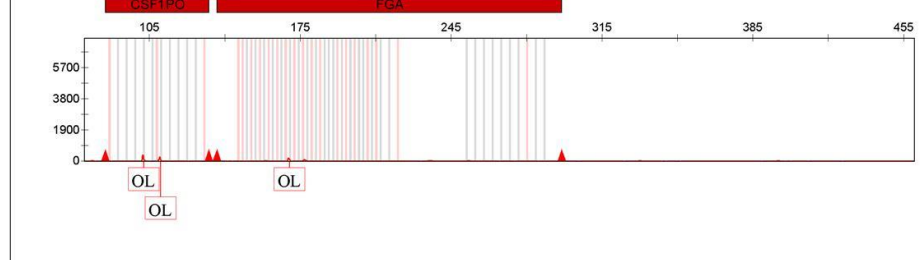

| Sample Name | SOS                                                                               | SQ                                                                                | SSPK                                                                              | MIX                                                                                 | CGQ                                                                                 |
|-------------|-----------------------------------------------------------------------------------|-----------------------------------------------------------------------------------|-----------------------------------------------------------------------------------|-------------------------------------------------------------------------------------|-------------------------------------------------------------------------------------|
| 4           |  |  |  |  |  |

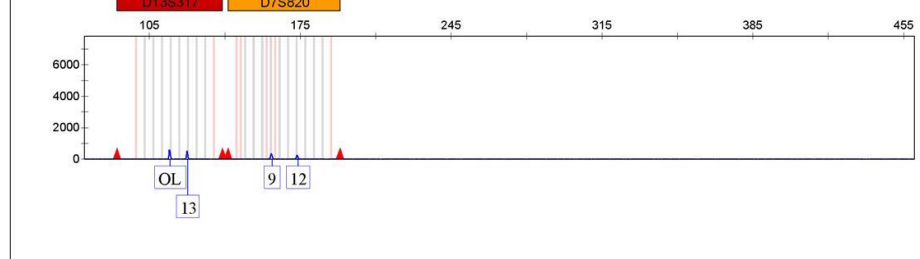

| Sample Name | SOS                                                                                 | SQ                                                                                  | SSPK                                                                                | MIX                                                                                   | CGQ                                                                                   |
|-------------|-------------------------------------------------------------------------------------|-------------------------------------------------------------------------------------|-------------------------------------------------------------------------------------|---------------------------------------------------------------------------------------|---------------------------------------------------------------------------------------|
| 4           |  |  |  |  |  |

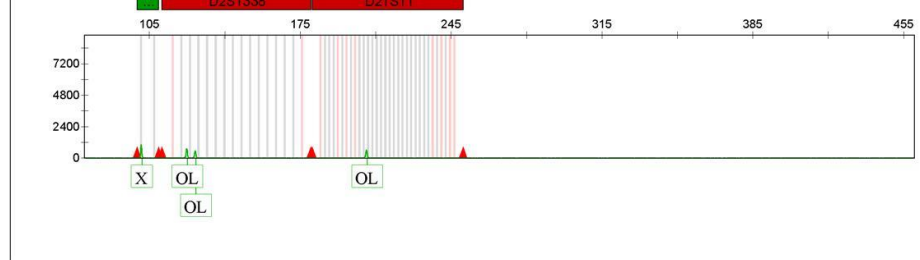

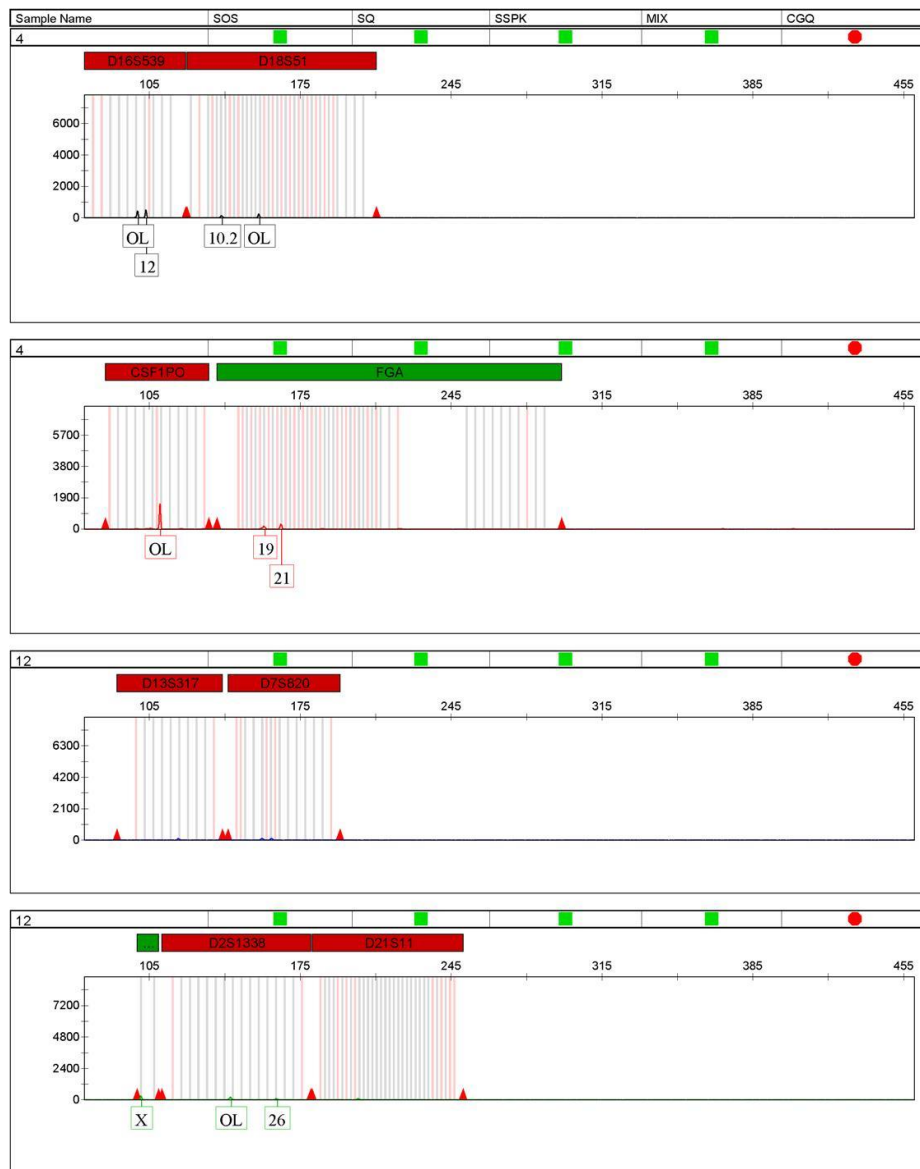

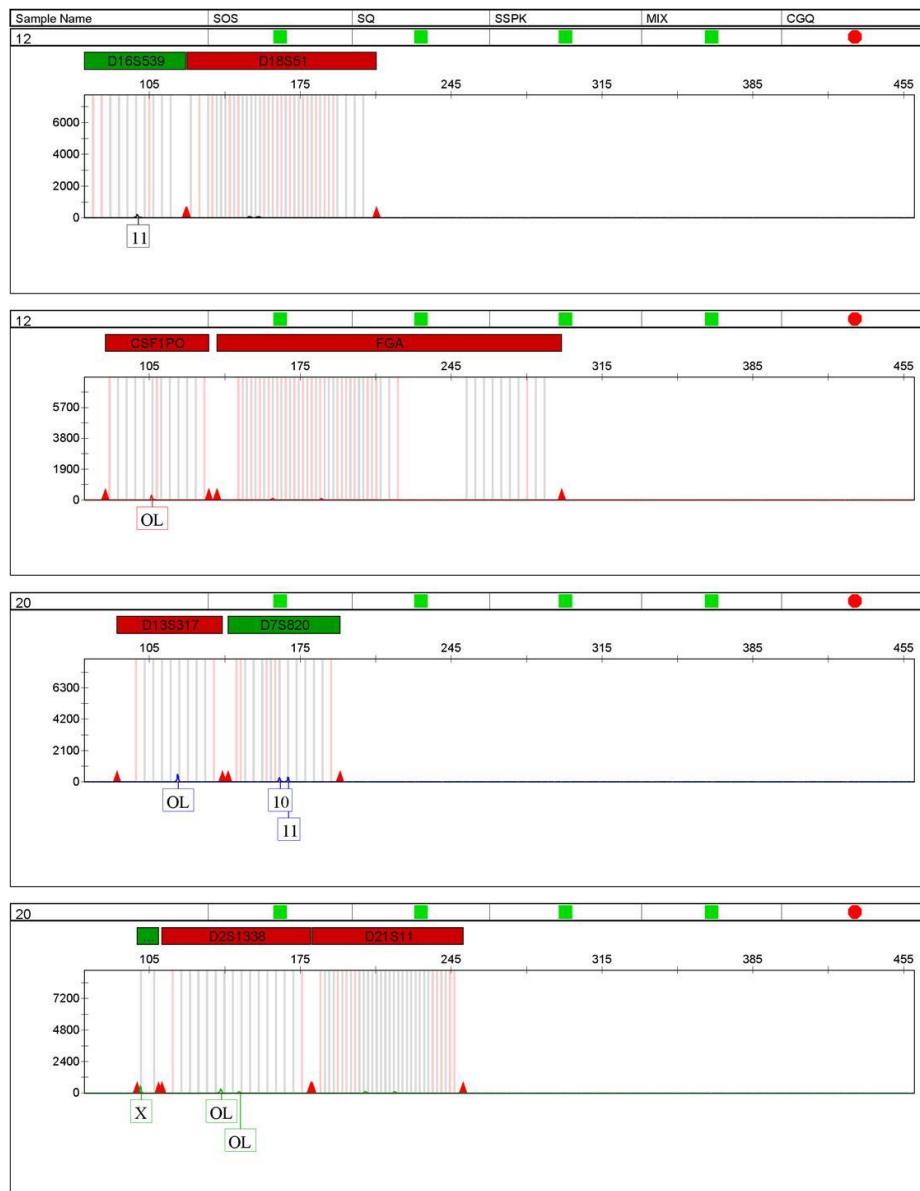

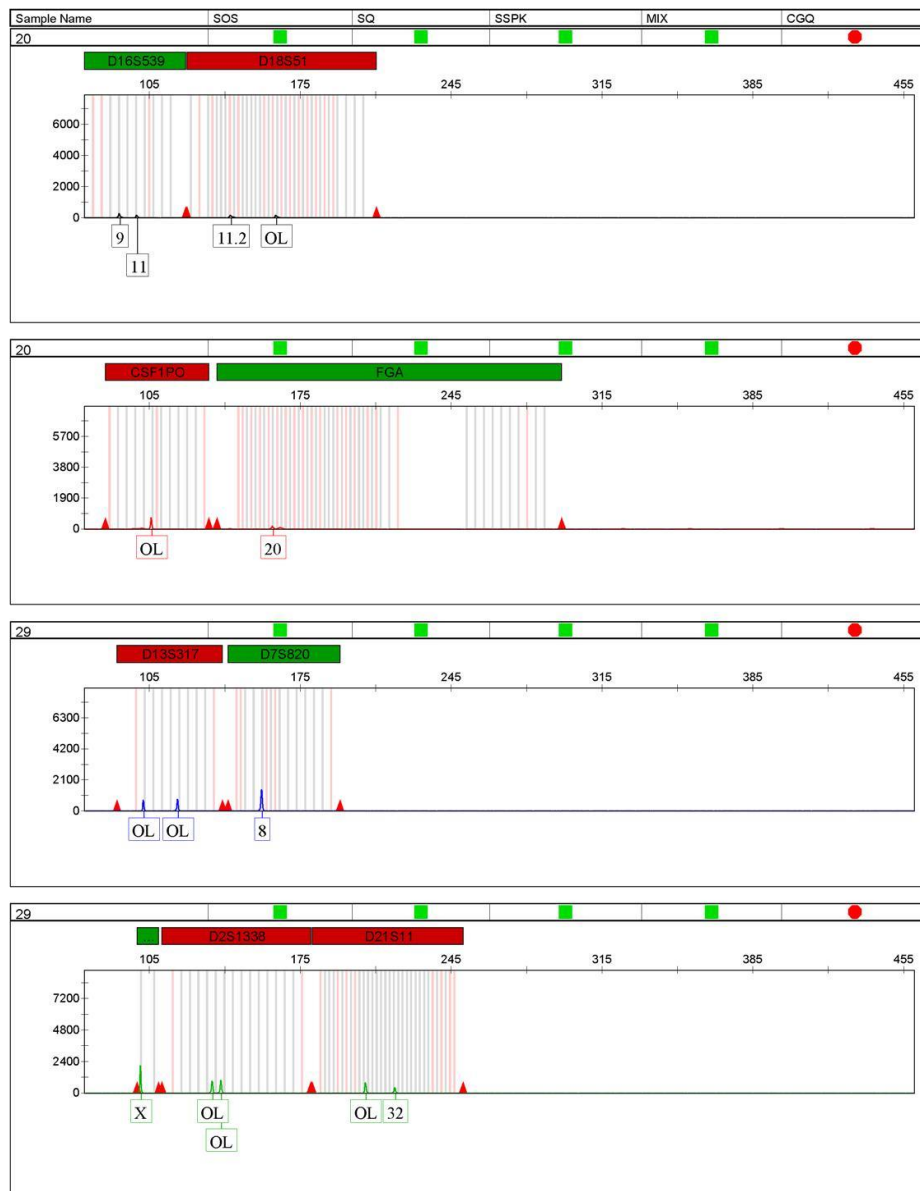

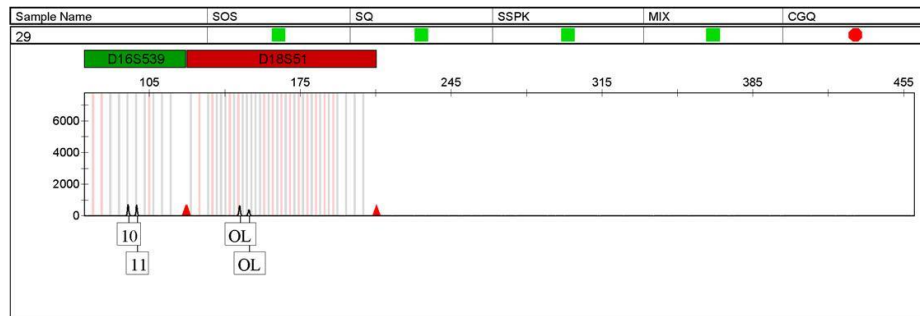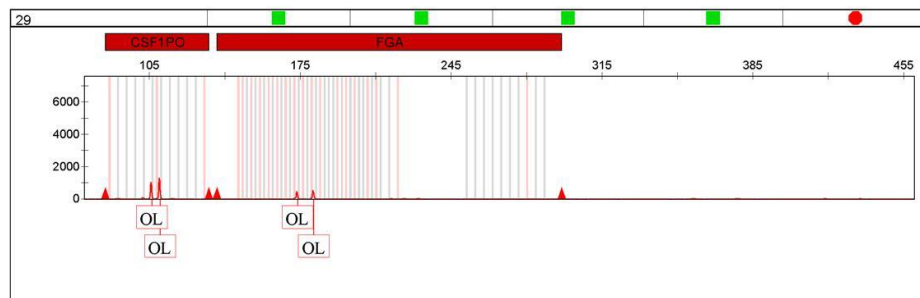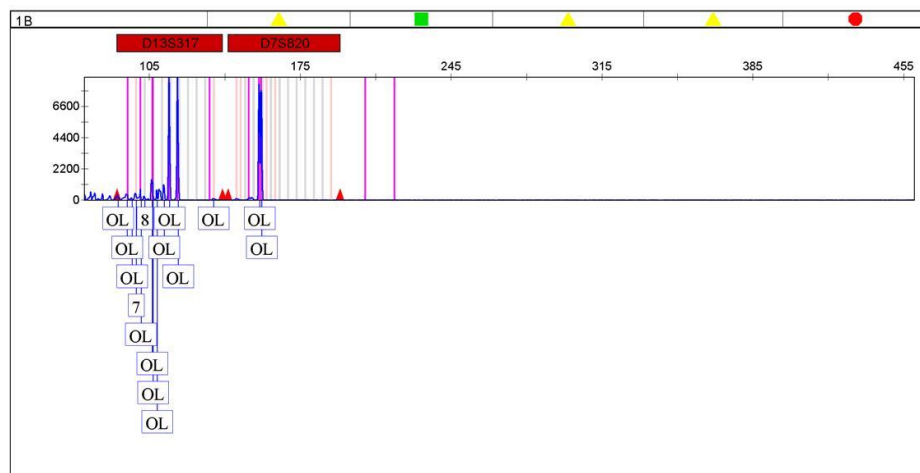

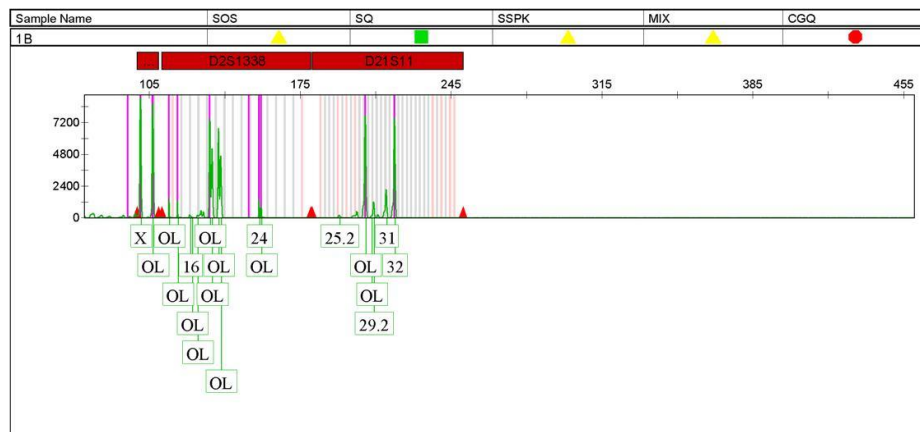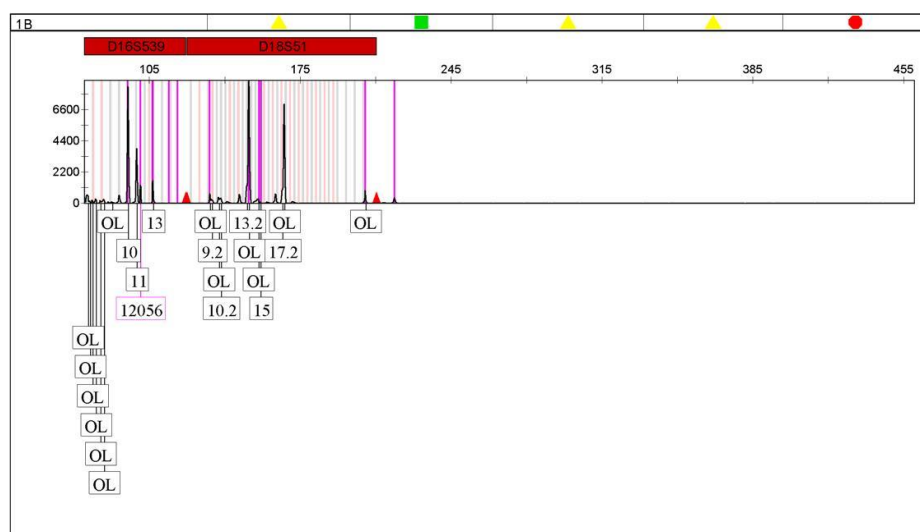

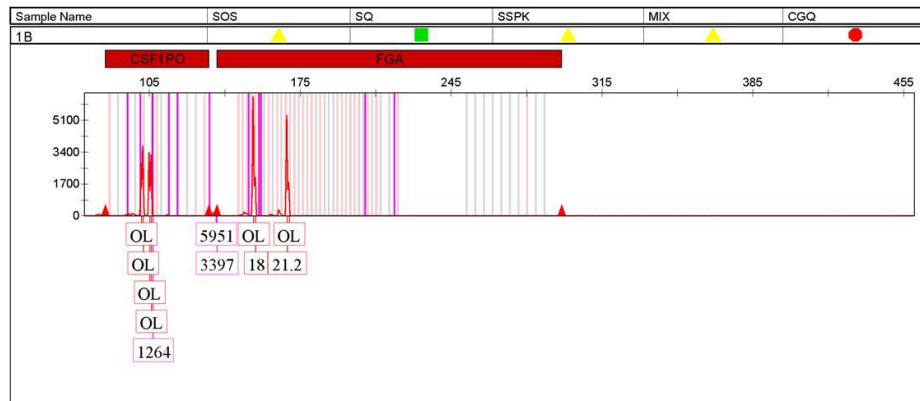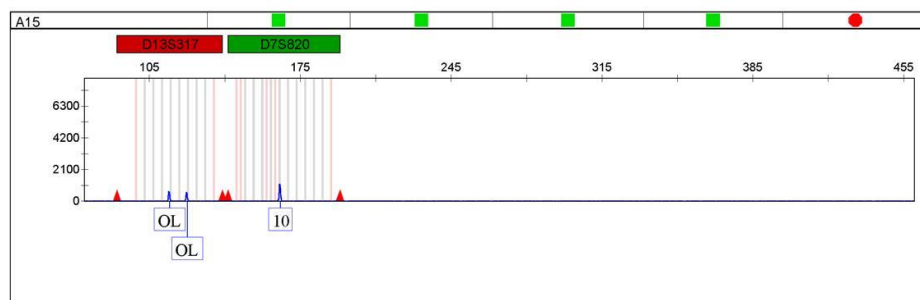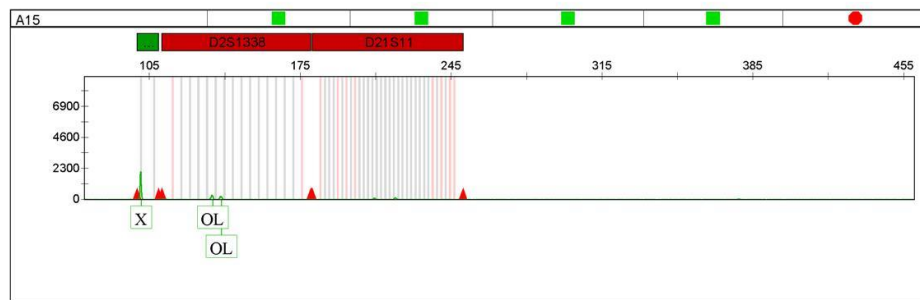



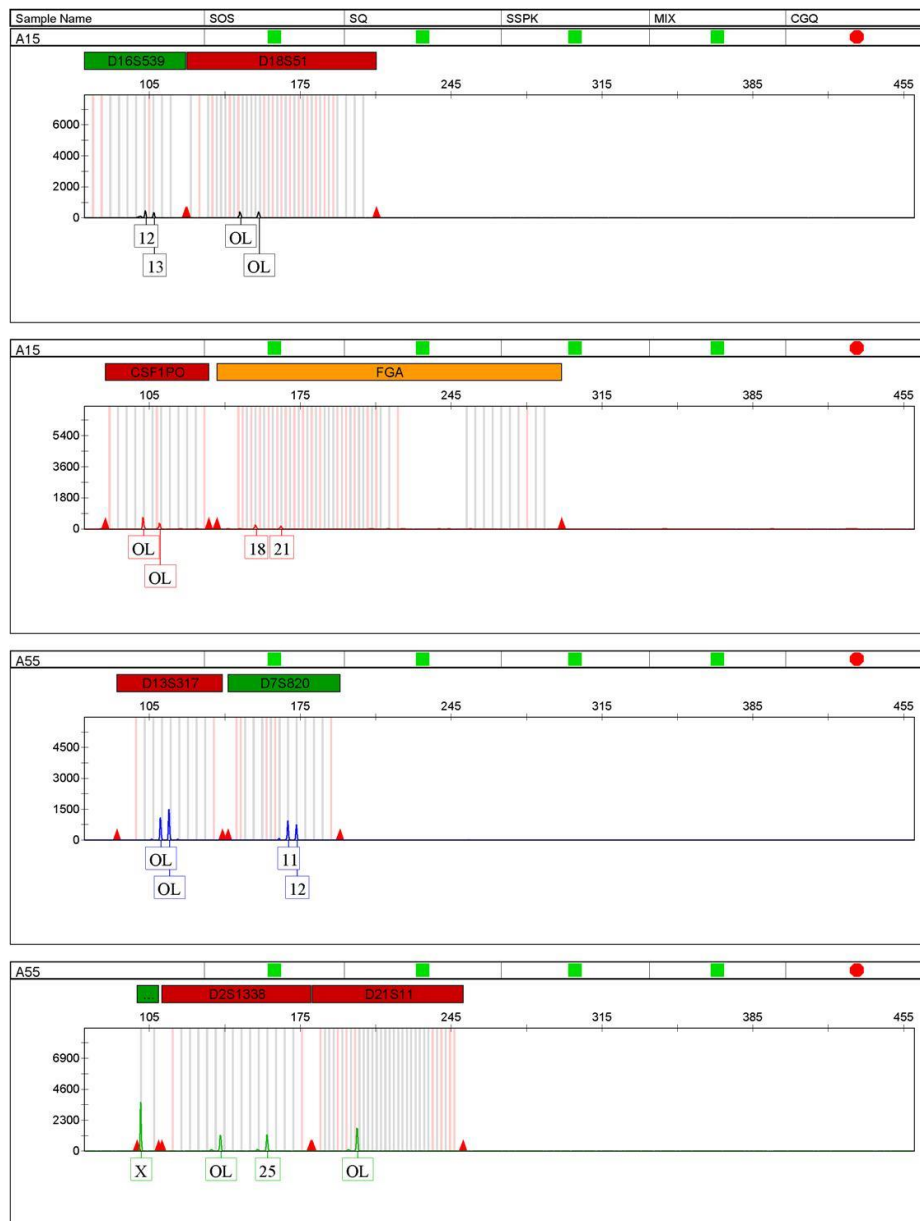

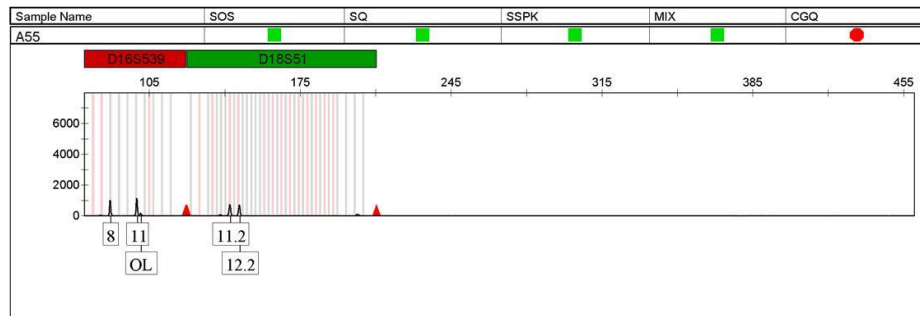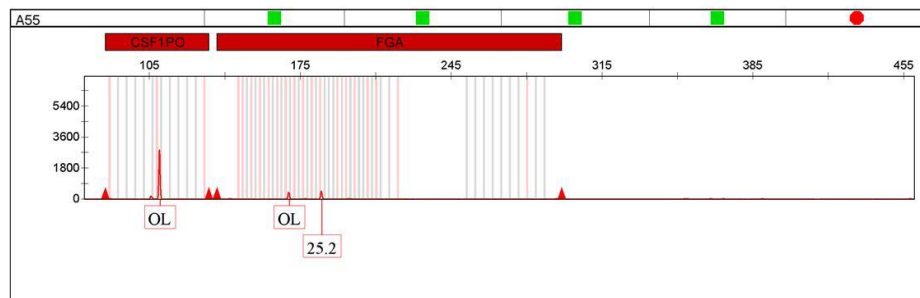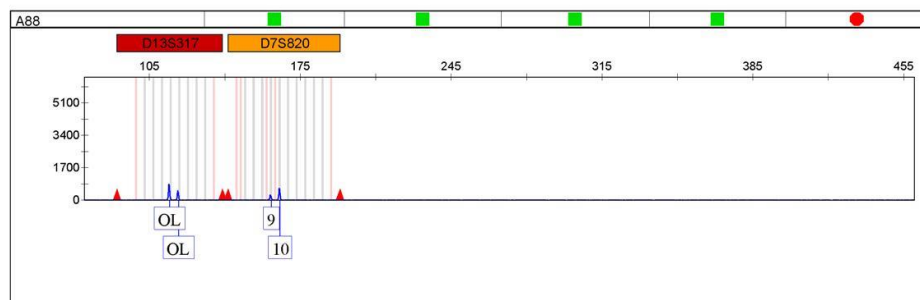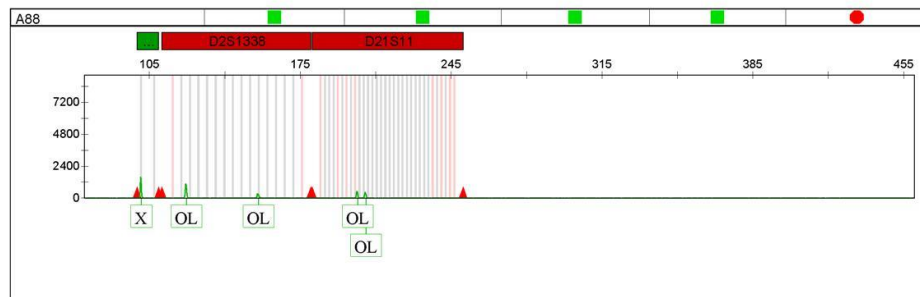

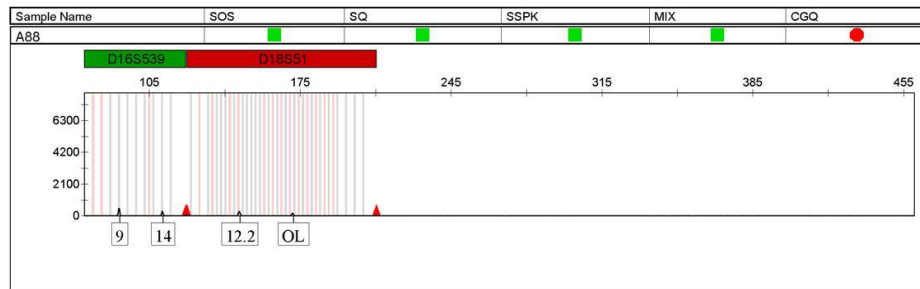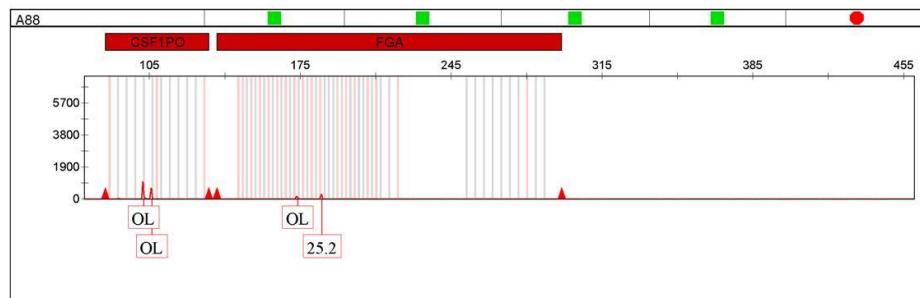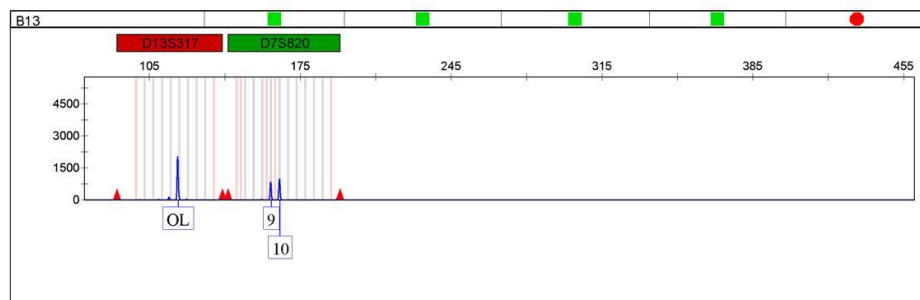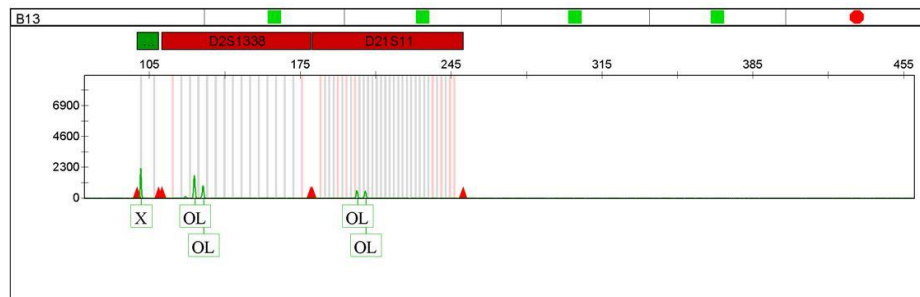

| Sample Name | SOS                                                                               | SQ                                                                                | SSPK                                                                              | MIX                                                                                 | CGQ                                                                                 |
|-------------|-----------------------------------------------------------------------------------|-----------------------------------------------------------------------------------|-----------------------------------------------------------------------------------|-------------------------------------------------------------------------------------|-------------------------------------------------------------------------------------|
| B13         |  |  |  |  |  |

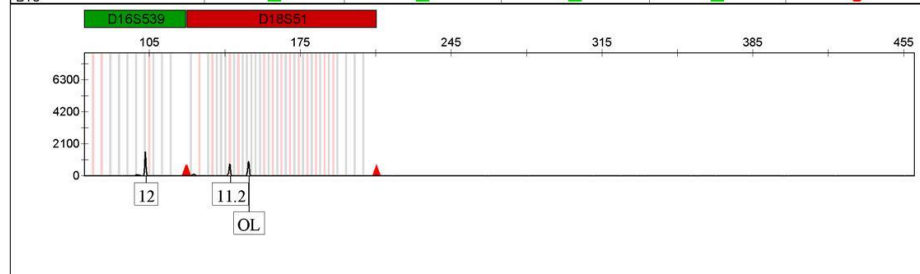

| Sample Name | SOS                                                                               | SQ                                                                                | SSPK                                                                              | MIX                                                                                 | CGQ                                                                                 |
|-------------|-----------------------------------------------------------------------------------|-----------------------------------------------------------------------------------|-----------------------------------------------------------------------------------|-------------------------------------------------------------------------------------|-------------------------------------------------------------------------------------|
| B13         |  |  |  |  |  |

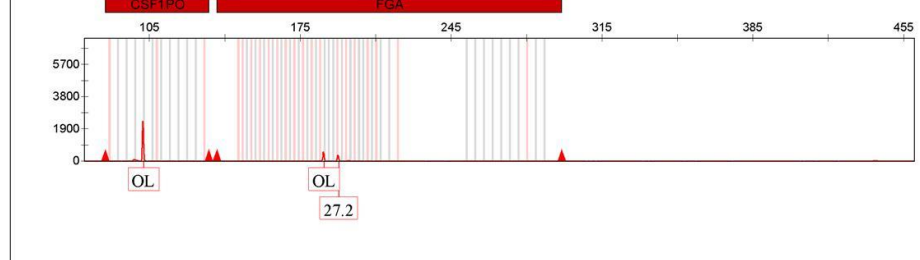

| Sample Name | SOS                                                                               | SQ                                                                                | SSPK                                                                              | MIX                                                                                 | CGQ                                                                                 |
|-------------|-----------------------------------------------------------------------------------|-----------------------------------------------------------------------------------|-----------------------------------------------------------------------------------|-------------------------------------------------------------------------------------|-------------------------------------------------------------------------------------|
| B34         |  |  |  |  |  |

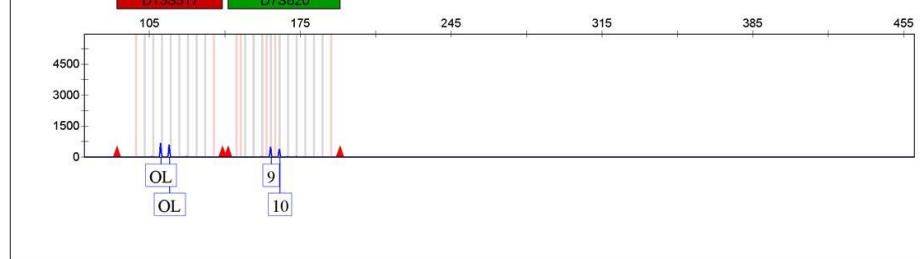

| Sample Name | SOS                                                                                 | SQ                                                                                  | SSPK                                                                                | MIX                                                                                   | CGQ                                                                                   |
|-------------|-------------------------------------------------------------------------------------|-------------------------------------------------------------------------------------|-------------------------------------------------------------------------------------|---------------------------------------------------------------------------------------|---------------------------------------------------------------------------------------|
| B34         |  |  |  |  |  |

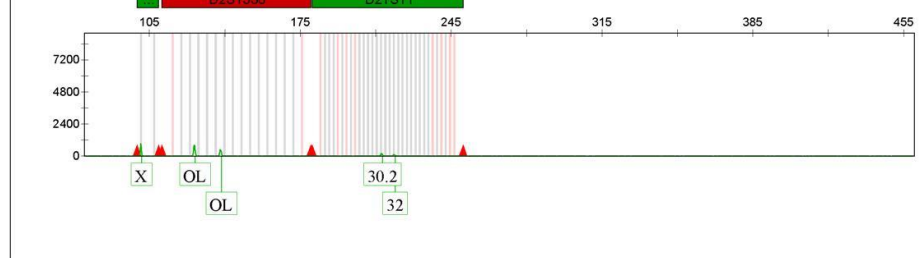

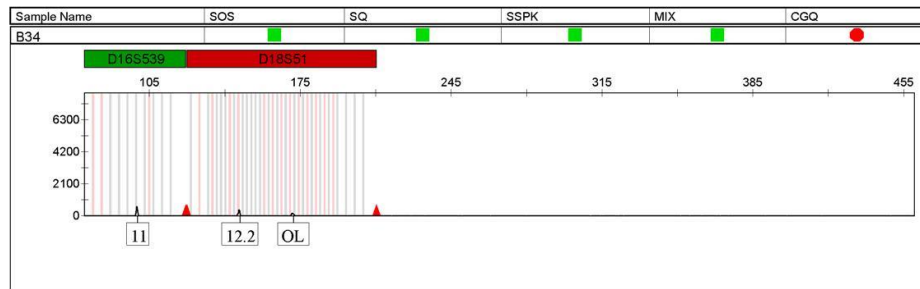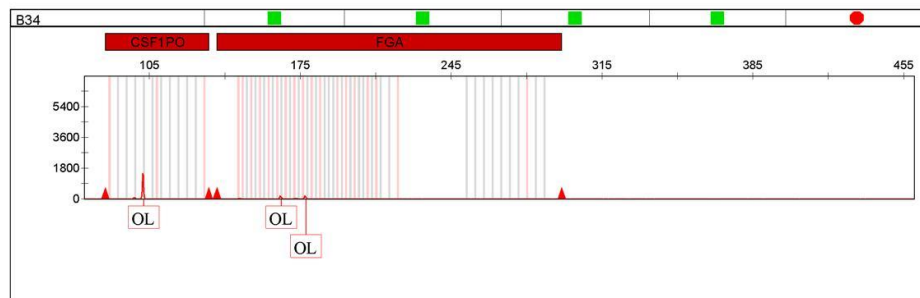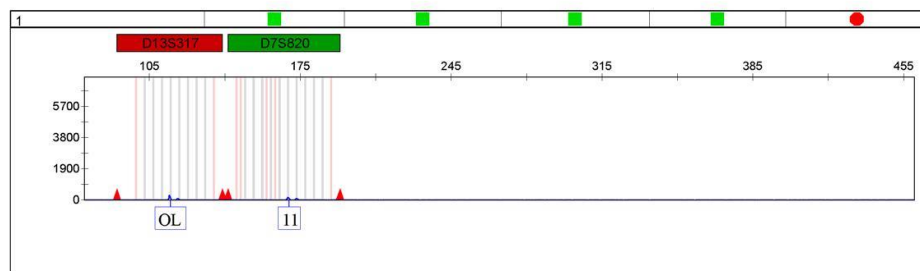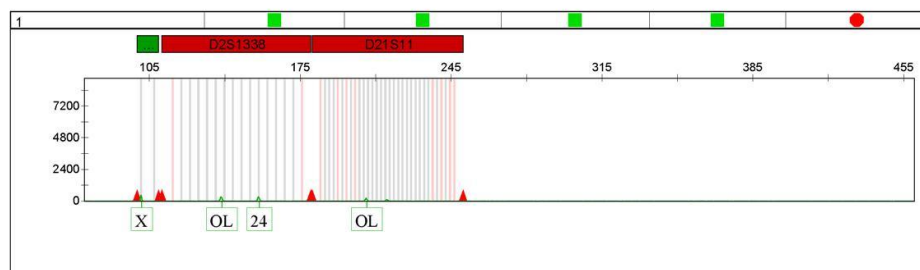

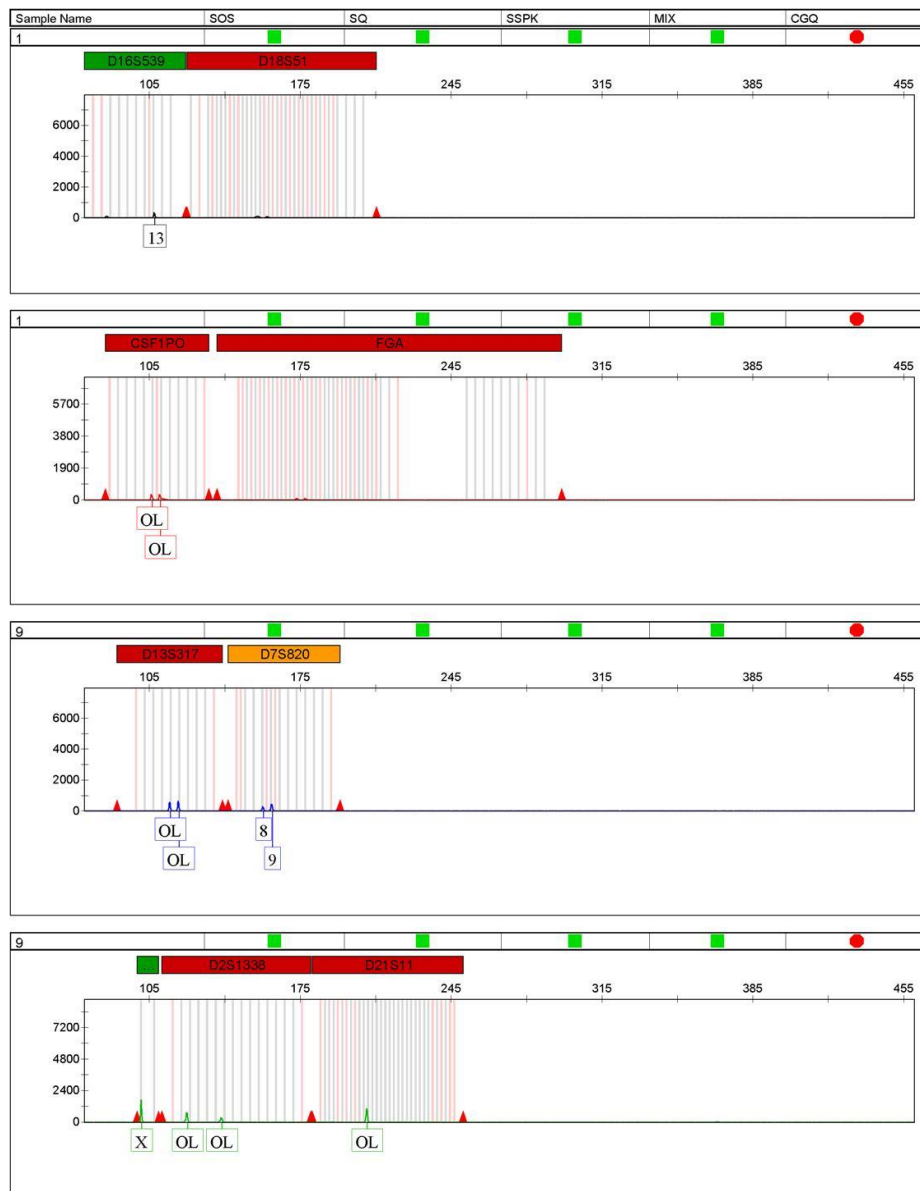

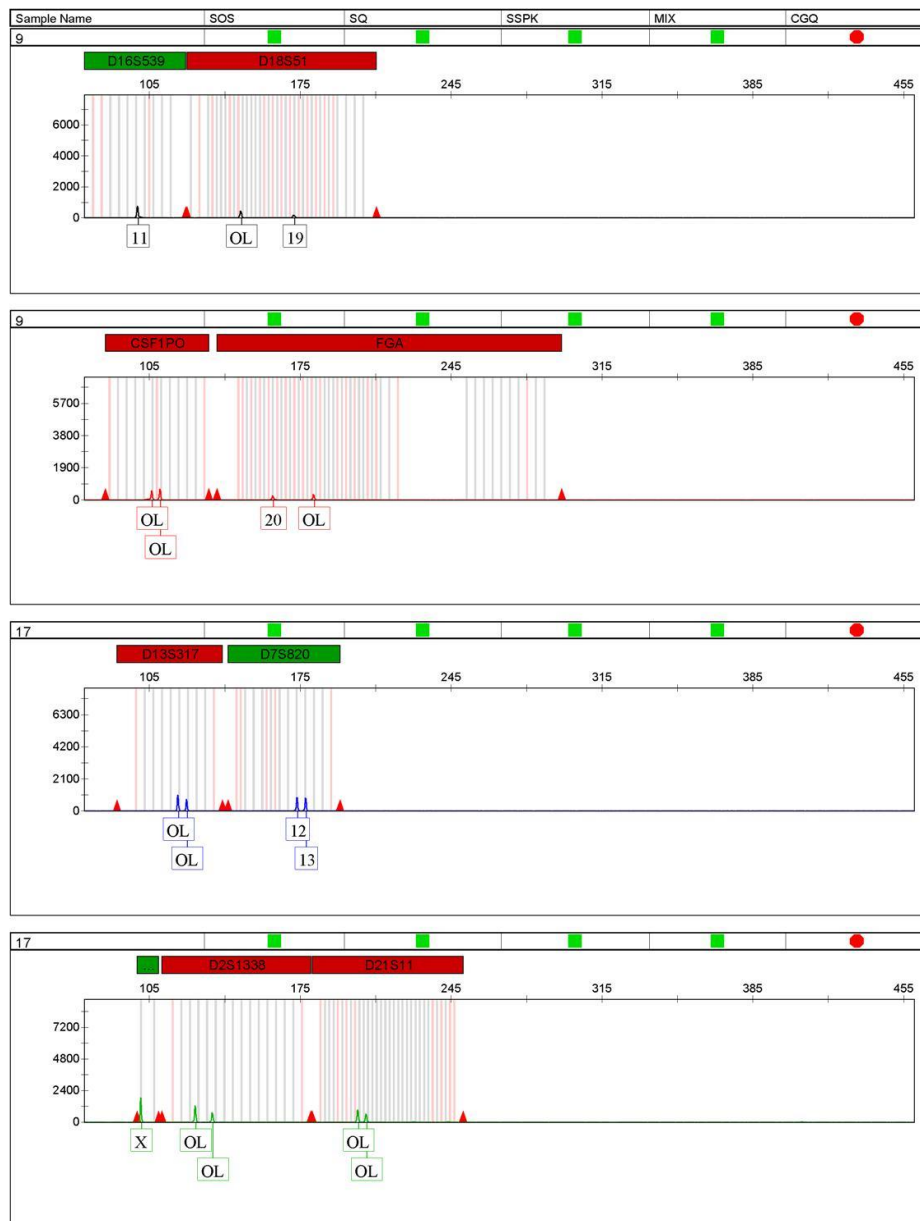

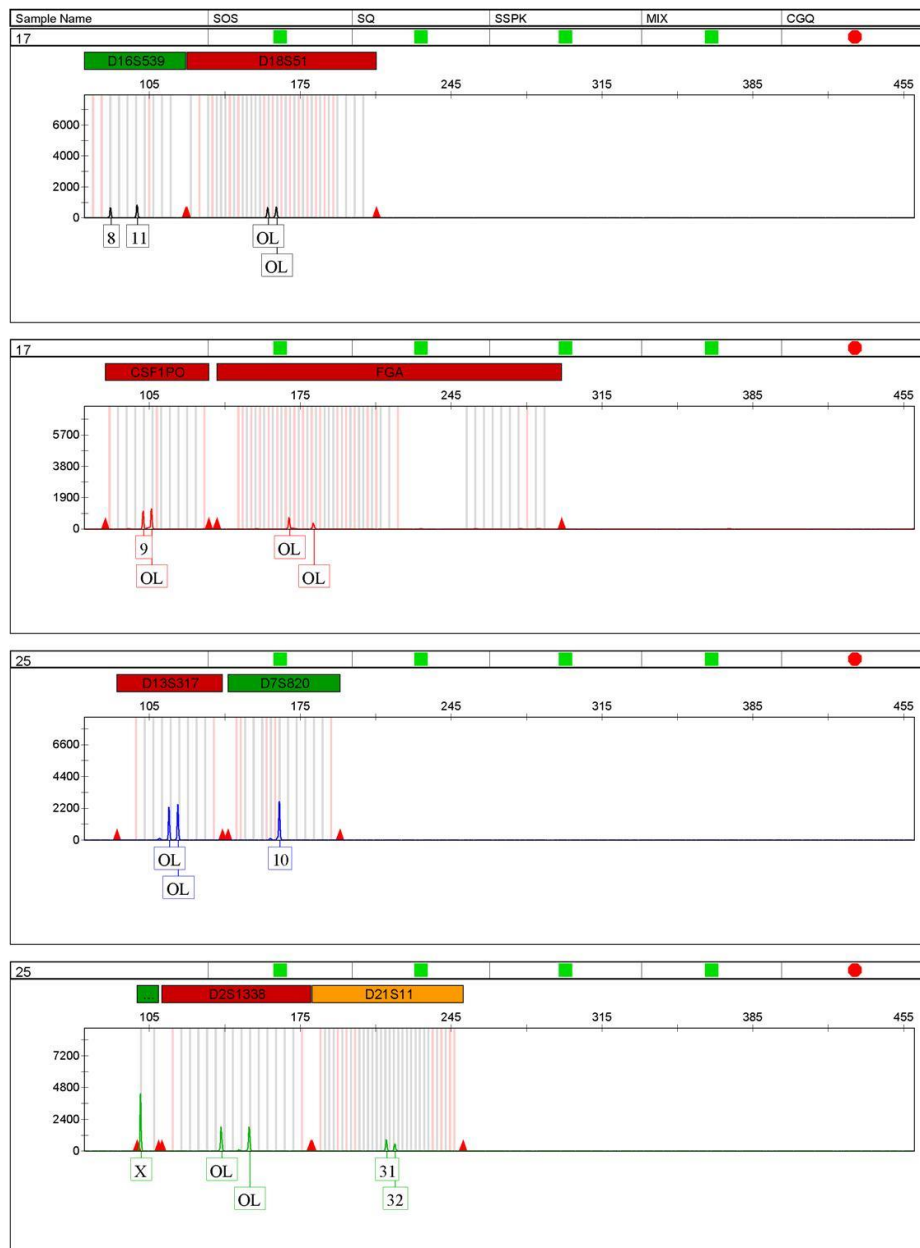



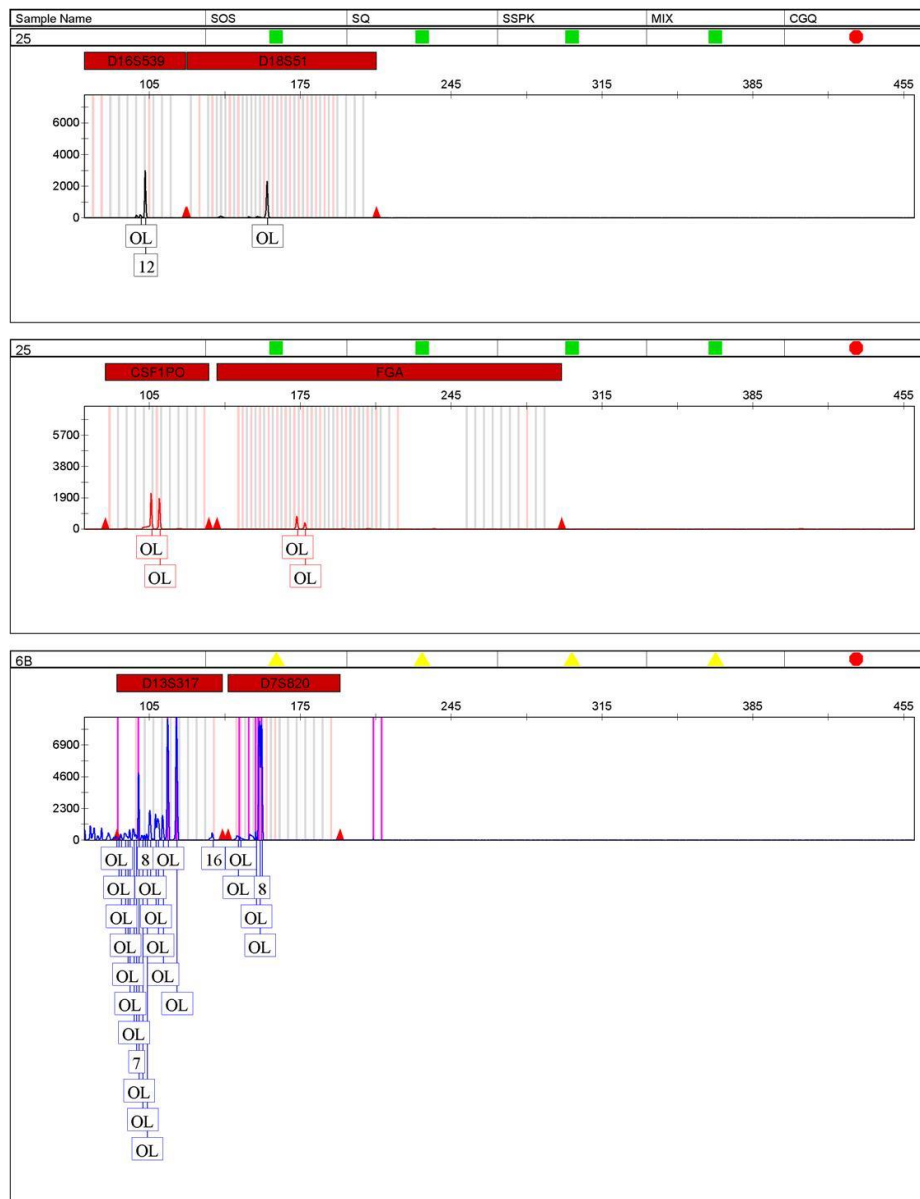

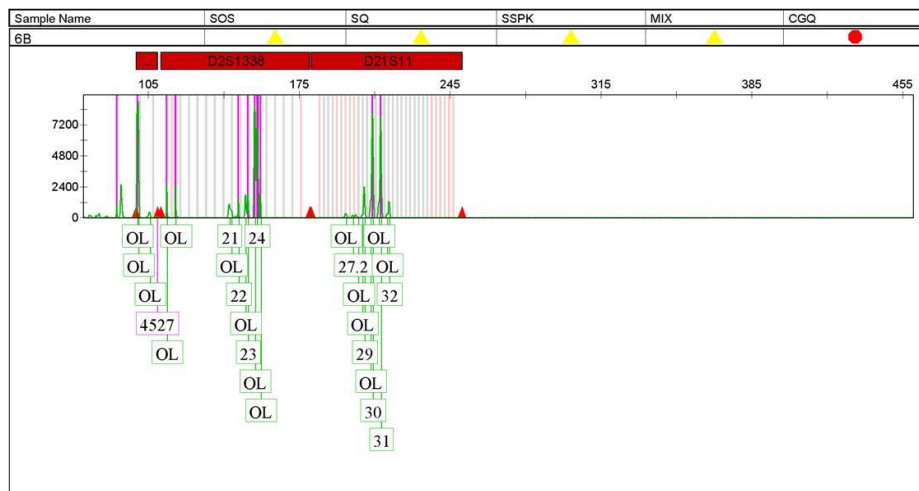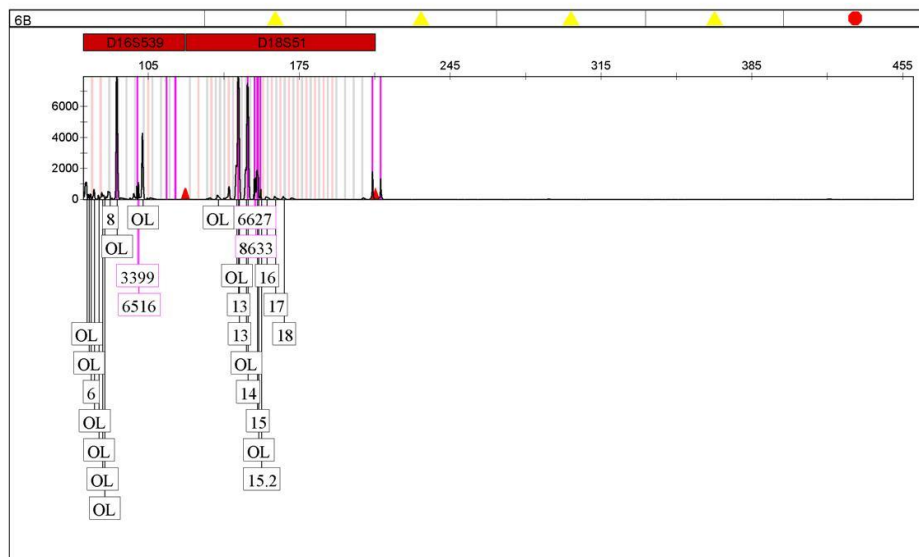

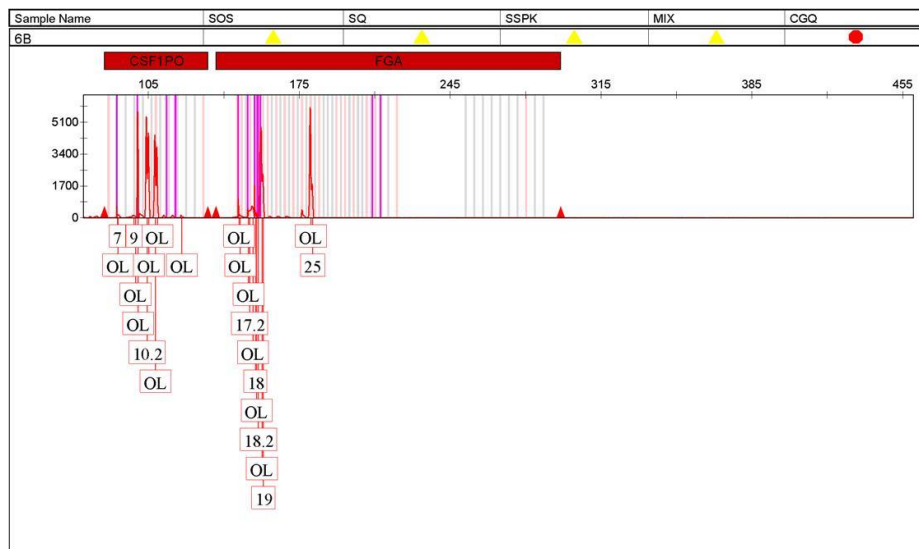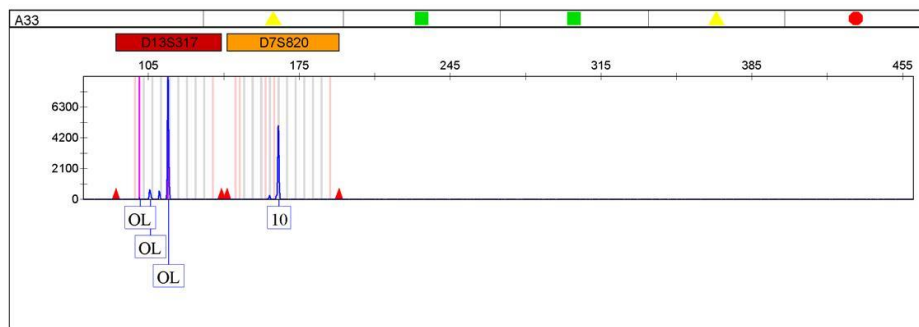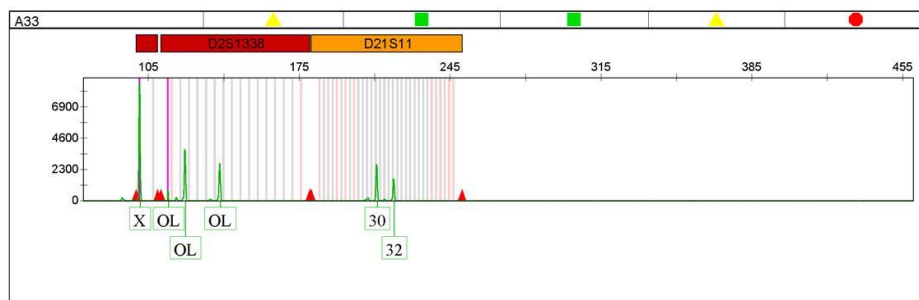

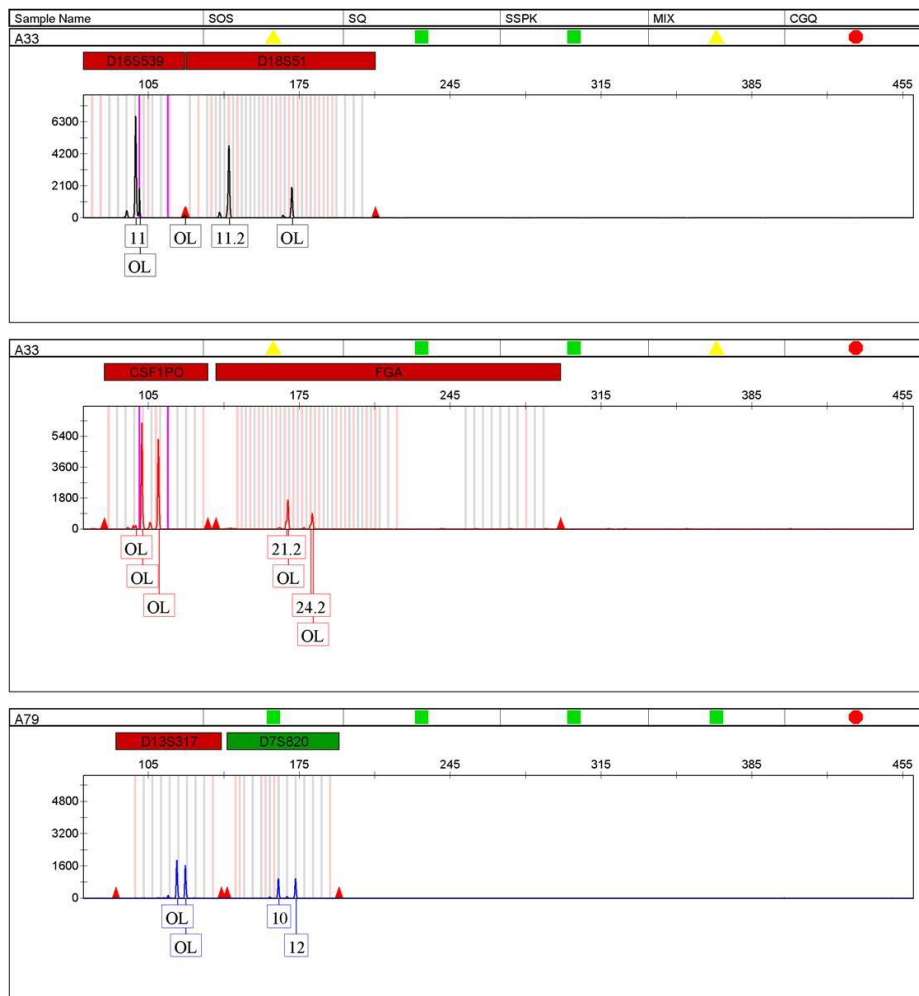

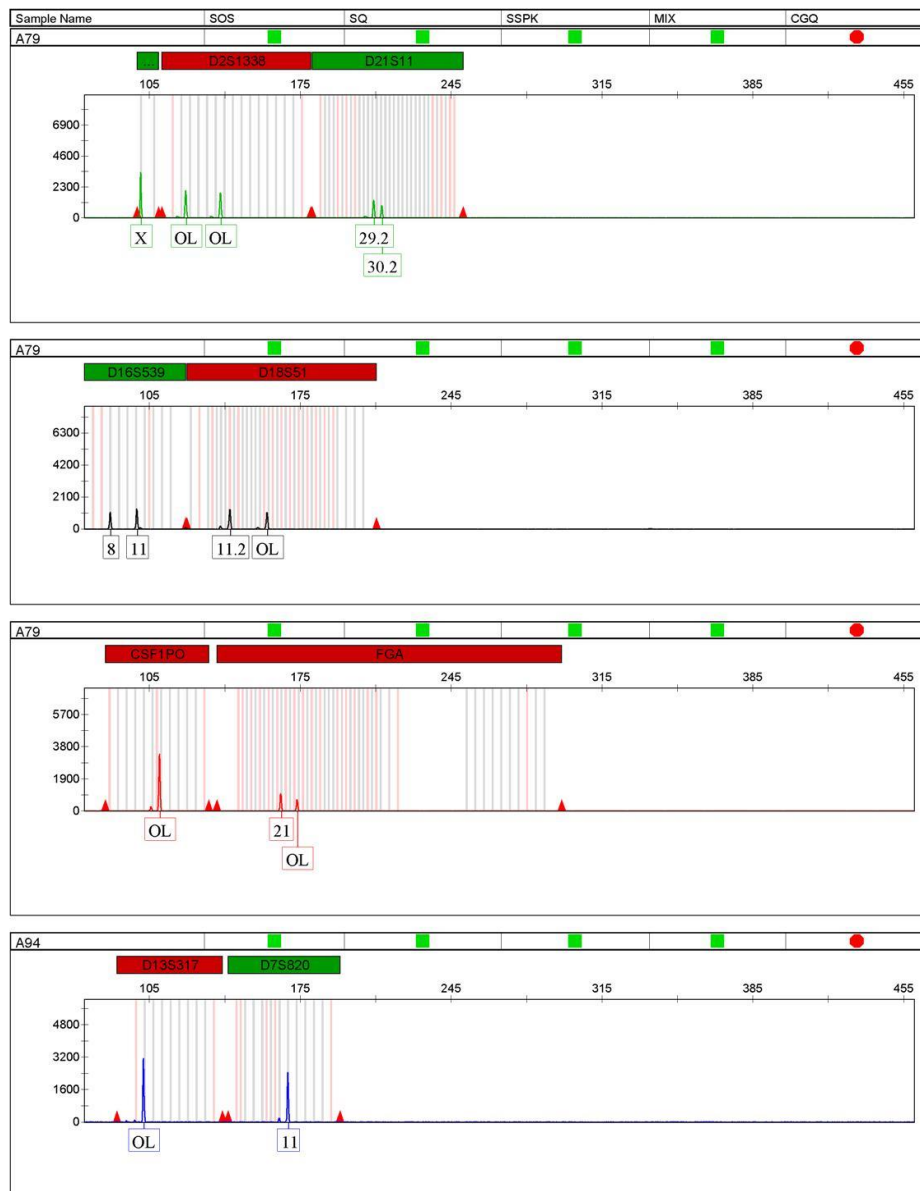

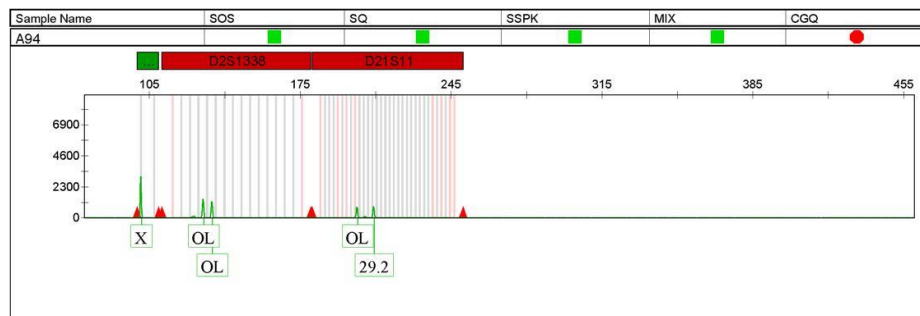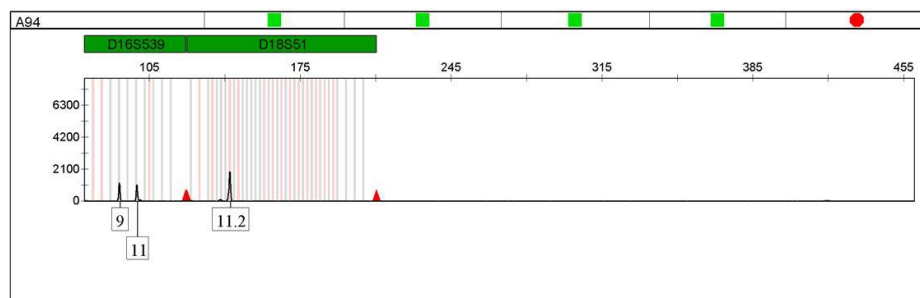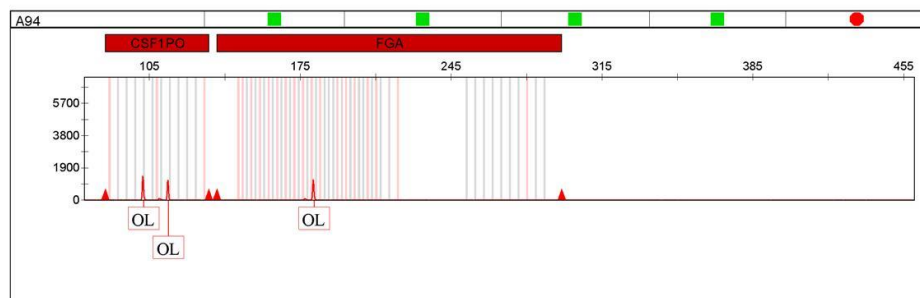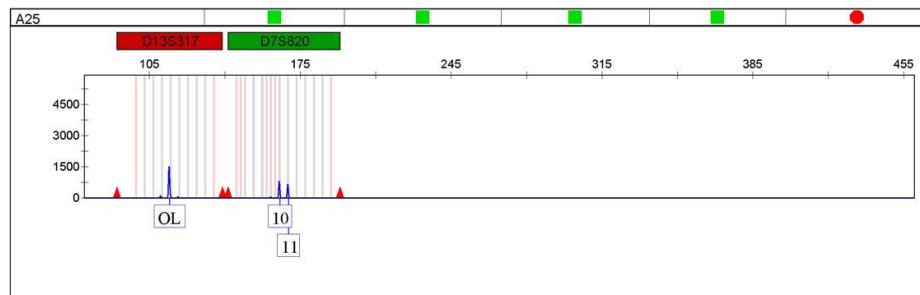

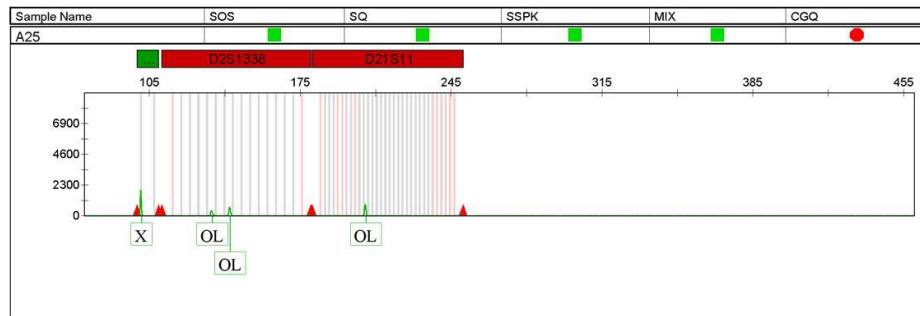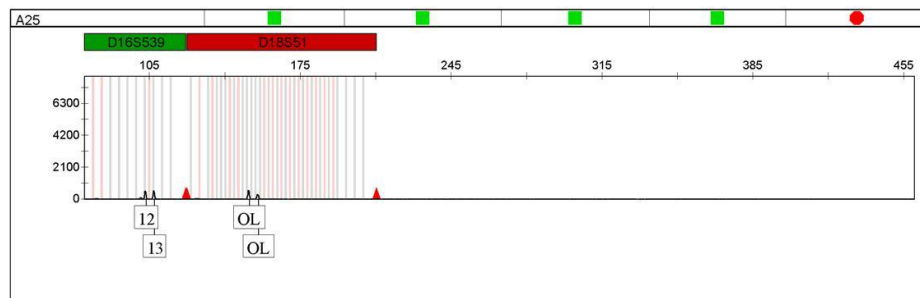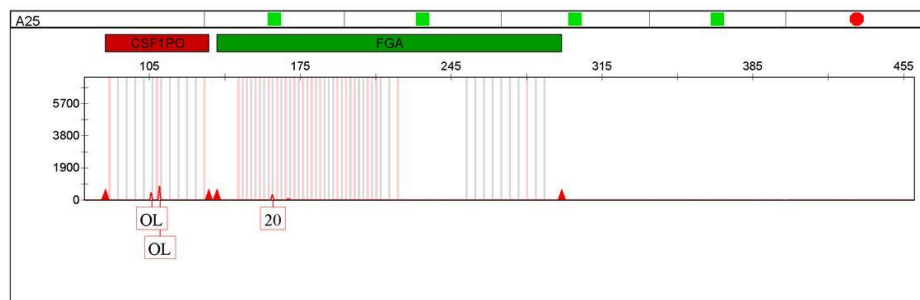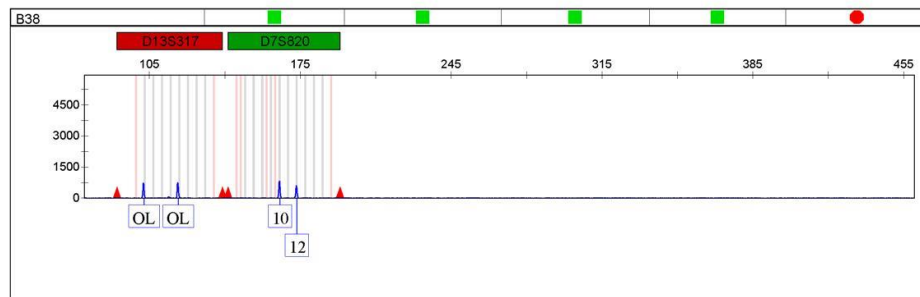

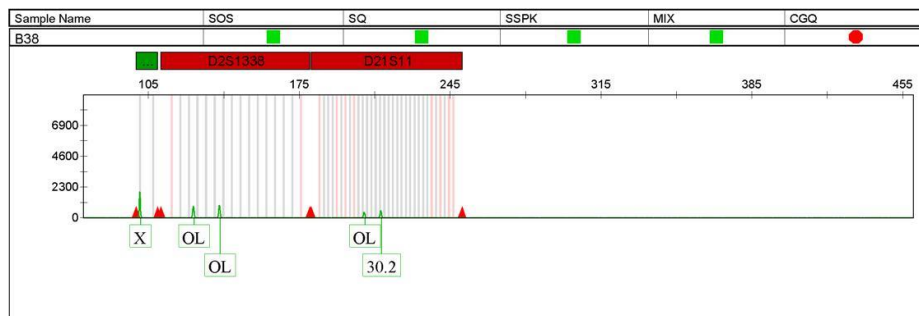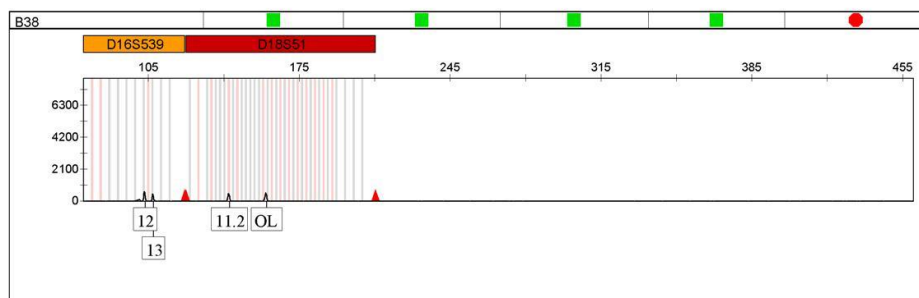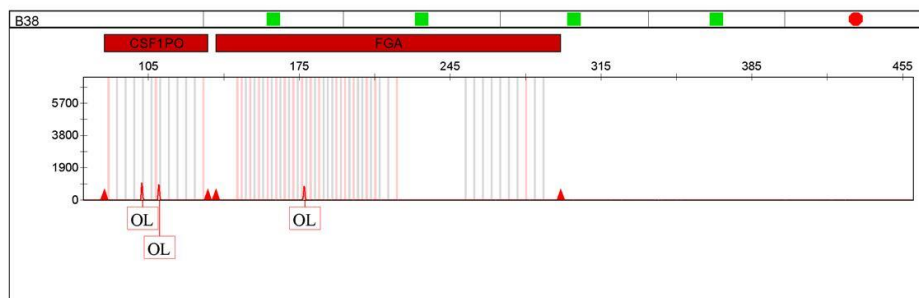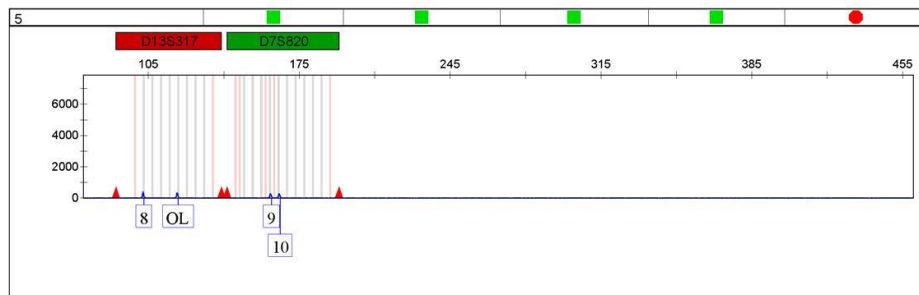



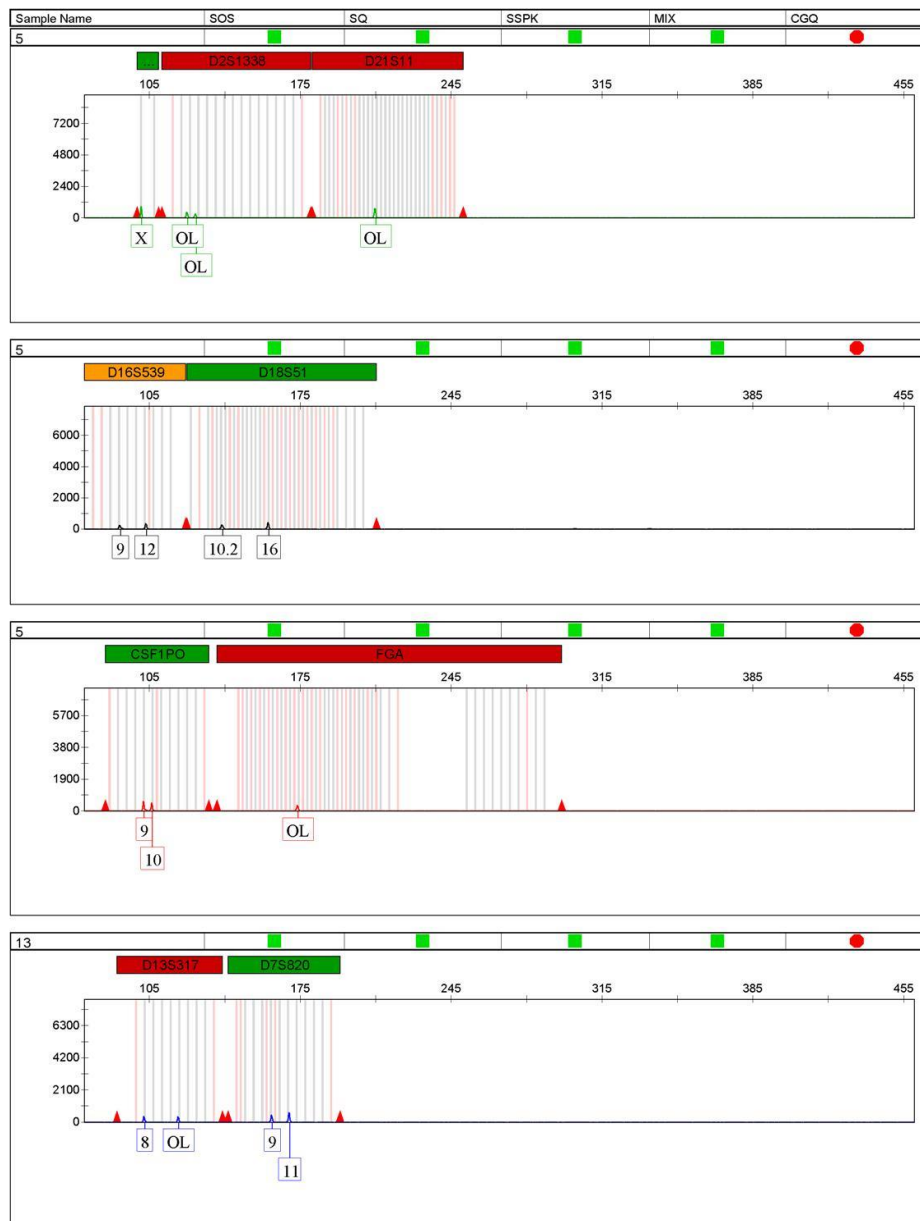

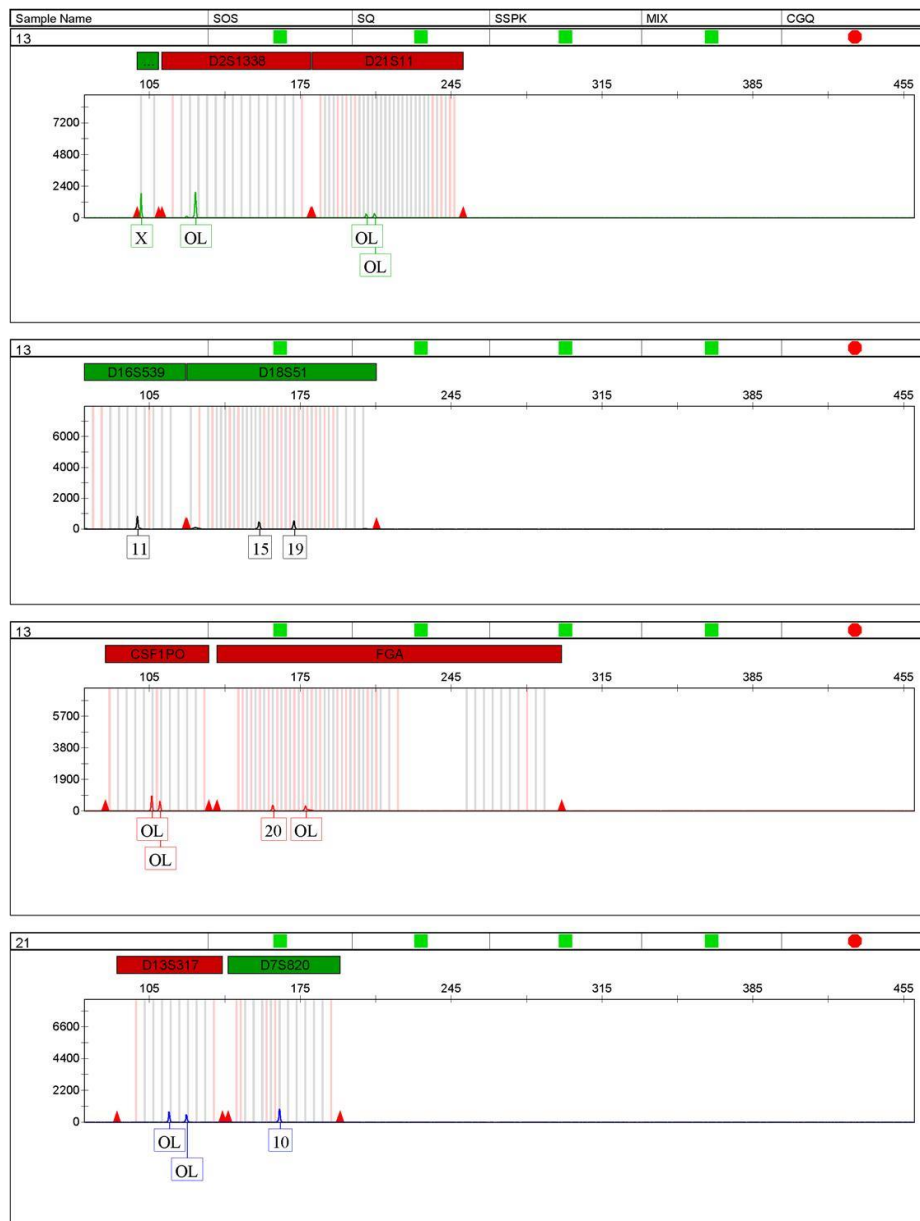

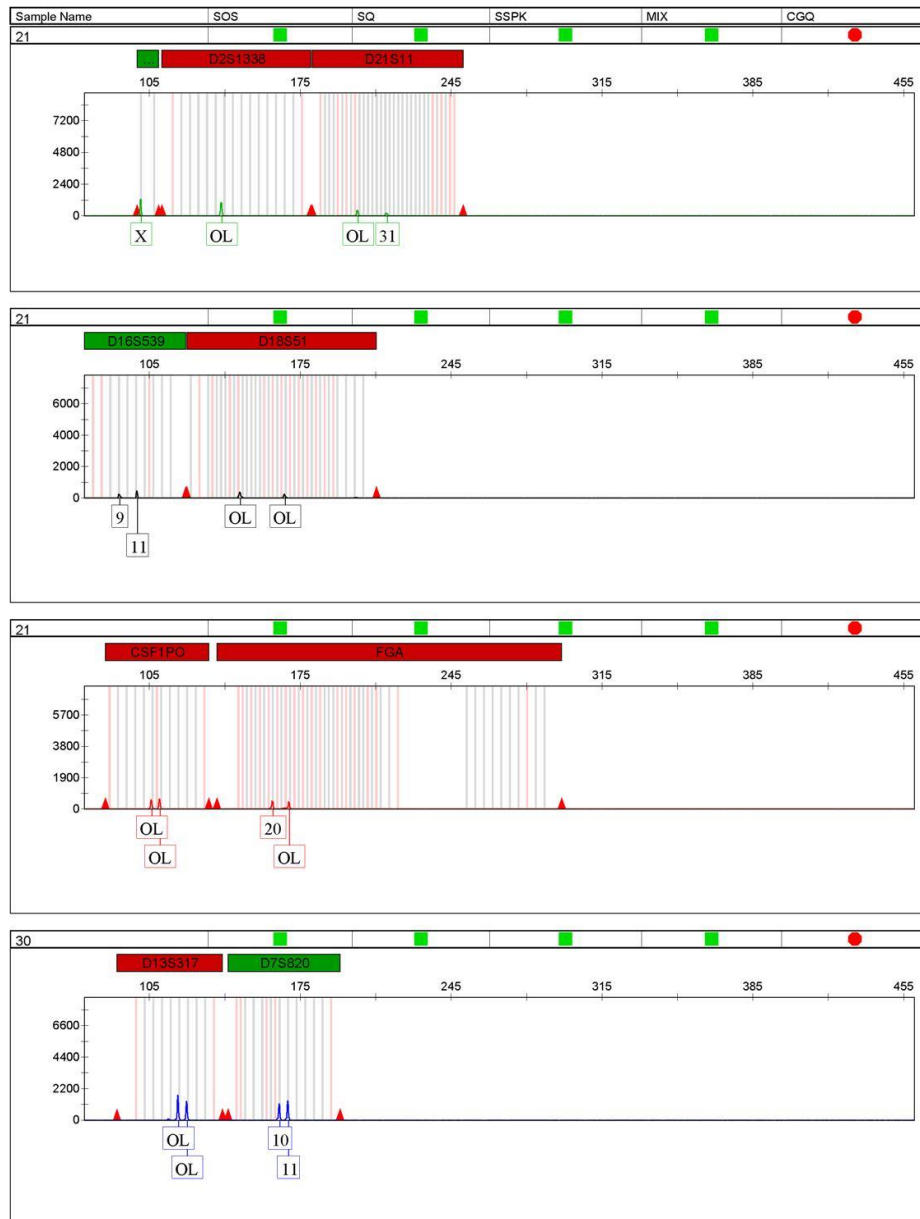

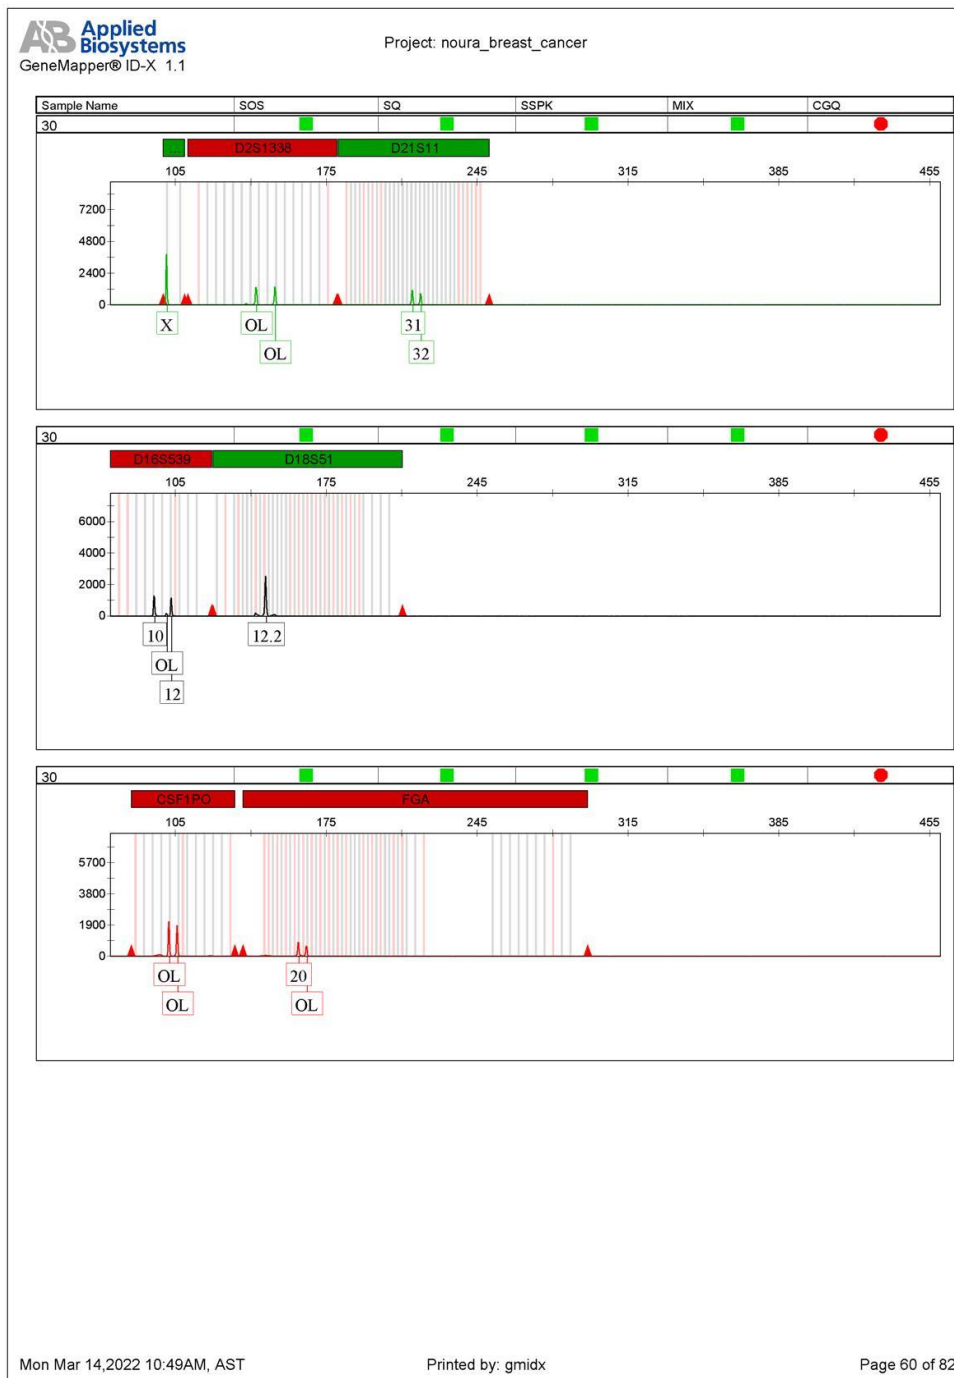

**Figure S1.** Electropherogram generated from short tandem repeat profiling of cfDNA and genomic DNA extracted from BC patients.
