# Supplementary material for: Utility of Circulating Cell-Free DNA in Assessing Microsatellite Instability and Loss of Heterozygosity in Breast Cancer Using Human Identification Approach
Source: MDPI journal article supplement (doi:10.3390/genes13040590), 2022-03-25
Supplement: s1 [file s1]

**Table S2.** STR profiling results of Cf-DNA and genomic DNA of BC patients.

| Sample ID | D13S317 | D7S820 | D2S1338 | D21S11    | D16S539 | D18S51  | CSF1P0 | FGA   | Alleles (%)  | Genetic alterations                                                                                                                                                                                                                   |
|-----------|---------|--------|---------|-----------|---------|---------|--------|-------|--------------|---------------------------------------------------------------------------------------------------------------------------------------------------------------------------------------------------------------------------------------|
| p1        | 12,14   | 10,10  | 22,24   | 29.2,30   | 11,11   | 12,14   | 11,11  | 23,25 | 2/16 (12.5%) | LOH: Allelic dropout except for <b>D7S820</b> locus                                                                                                                                                                                   |
| Pp1       | DO      | 10,10  | DO      | DO        | DO      | DO      | DO     | DO    |              |                                                                                                                                                                                                                                       |
| p2        | 11,11   | 9,9    | 20,20   | 31,32.2   | 11,11   | 14,19   | 11,11  | 23,24 | 16/16 (100%) | LOH: Loss of allele (24) for locus <b>FGA</b>                                                                                                                                                                                         |
| Pp2       | 11,11   | 9,9    | 20,20   | 31,32.2   | 11,11   | 14,19   | 11,11  | 23,23 |              |                                                                                                                                                                                                                                       |
| p3        | 11,13   | 10,10  | 19,20   | 29.2,32.2 | 12,13   | 13,15   | 10,12  | 18,21 | 16/16 (100%) |                                                                                                                                                                                                                                       |
| Pp3       | 11,13   | 10,10  | 19,20   | 29.2,32.2 | 12,13   | 13,15   | 10,12  | 18,21 |              |                                                                                                                                                                                                                                       |
| p4        | 11,11   | 9,11   | 19,20   | 28.2,31   | 11,13   | 14.2,17 | 10,12  | 20,22 | 8/16 (50%)   | <ul style="list-style-type: none"> <li>- <b>LOH in D7S820</b>: Loss of allele (11)</li> <li>- <b>D21S11</b>: allele dropout</li> <li>- <b>LOH in D16S539</b>: loss of allele (13)</li> <li>- <b>D18S51</b>: allele dropout</li> </ul> |
| Pp4       | 11,11   | 9,9    | 19,20   | DO        | 11,11   | DO      | DO     | DO    |              |                                                                                                                                                                                                                                       |

|     |       |       |       |           |       |         |       |       |              |                                                                                                                                                                                                                  |
|-----|-------|-------|-------|-----------|-------|---------|-------|-------|--------------|------------------------------------------------------------------------------------------------------------------------------------------------------------------------------------------------------------------|
|     |       |       |       |           |       |         |       |       |              | <ul style="list-style-type: none"> <li>- <b>CSF1P0</b>: allele dropout</li> <li>- <b>FGA</b>: allelic dropout</li> </ul>                                                                                         |
| p5  | 11,12 | 8,9   | 19,24 | 28,29.2   | 9,12  | 14.2,16 | 9,12  | 20,23 | 0/16 (0%)    | Complete allelic Dropout                                                                                                                                                                                         |
| Pp5 | DO    | DO    | DO    | DO        | DO    | DO      | DO    | DO    |              |                                                                                                                                                                                                                  |
| p6  | 11,11 | 10,10 | 16,20 | 30,32     | 11,11 | 12,19   | 10,12 | 22,25 | 16/16 (100%) |                                                                                                                                                                                                                  |
| Pp6 | 11,11 | 10,10 | 16,20 | 30,32     | 11,11 | 12,19   | 10,12 | 22,25 |              |                                                                                                                                                                                                                  |
| p7  | 8,12  | 10,12 | 17,20 | 28.2,30.2 | 12,13 | 12,16   | 10,12 | 24,24 | 16/16 (100%) |                                                                                                                                                                                                                  |
| Pp7 | 8,12  | 10,12 | 17,20 | 28.2,30.2 | 12,13 | 12,16   | 10,12 | 24,24 |              |                                                                                                                                                                                                                  |
| p8  | 10,12 | 12,13 | 17,20 | 28.2,29.2 | 11,13 | 16,17   | 10,12 | 22,25 | 16/16 (100%) | <ul style="list-style-type: none"> <li>- <b>D13S317</b>: Deletion of allele (12) and insertion of allele (11).</li> <li>- <b>D16S539</b>: Deletion of alleles (11,13) and insertion of alleles (9,12)</li> </ul> |
| Pp8 | 10,11 | 12,13 | 17,20 | 28.2,29.2 | 9,12  | 16,17   | 10,12 | 22,25 |              |                                                                                                                                                                                                                  |

|      |       |       |          |           |       |       |       |       |                   |                                                                                                          |
|------|-------|-------|----------|-----------|-------|-------|-------|-------|-------------------|----------------------------------------------------------------------------------------------------------|
| p9   | 9,12  | 10,12 | 24,25    | 30,30     | 11,13 | 12,18 | 10,12 | 24,24 | 14/16 (87.5%)     | <b>- D7S820: allelic dropout</b><br>- LOH in <b>D18S51</b> :<br>- Deletion of allele (12)                |
| Pp9  | 9,12  | DO    | 24,25    | 30,30     | 11,13 | 18,18 | 10,12 | 24,24 |                   |                                                                                                          |
| p10  | 10,11 | 11,12 | 20,25    | 28,28     | 8,11  | 12,13 | 9,12  | 22,26 | 16/16 (100%)      | LOH in <b>CSF1P0</b> : deletion of allele<br>(9)                                                         |
| Pp10 | 10,11 | 11,12 | 20,25    | 28,28     | 8,11  | 12,13 | 12,12 | 22,26 |                   |                                                                                                          |
| p11  | 8,13  | 10,10 | 17,22,26 | 29.2,33   | 11,11 | 14,16 | 10,12 | 19,20 | 16/17<br>(94.12%) | - LOH in <b>D13S317</b> : Deletion of<br>allele (8)<br>- Deletion of allele (26) (triallelic<br>pattern) |
| Pp11 | 13,13 | 10,10 | 17,22    | 29.2,33   | 11,11 | 14,16 | 10,12 | 19,20 |                   |                                                                                                          |
| p12  | 12,14 | 9,10  | 16,20    | 28,28     | 10,13 | 15,16 | 11,13 | 23,23 | 16/16 (100%)      |                                                                                                          |
| Pp12 | 12,14 | 9,10  | 16,20    | 28,28     | 10,13 | 15,16 | 11,13 | 23,23 |                   |                                                                                                          |
| p13  | 8,11  | 11,11 | 19,21    | 28,29     | 11,13 | 16,19 | 9,12  | 25,26 | 16/16 (100%)      | LOH in <b>CSF1P0</b> : deletion of allele<br><b>(9)</b>                                                  |
| Pp13 | 8,11  | 11,11 | 19,21    | 28,29     | 11,13 | 16,19 | 12,12 | 25,26 |                   |                                                                                                          |
| p14  | 12,13 | 10,12 | 16,20    | 29.2,30.2 | 8,11  | 12,16 | 12,12 | 21,23 | 16/16 (100%)      |                                                                                                          |

|      |       |       |       |           |       |         |         |       |              |                                                                                                                                                                                                                                                                                                                                      |
|------|-------|-------|-------|-----------|-------|---------|---------|-------|--------------|--------------------------------------------------------------------------------------------------------------------------------------------------------------------------------------------------------------------------------------------------------------------------------------------------------------------------------------|
| Pp14 | 12,13 | 10,12 | 16,20 | 29.2,30.2 | 8,11  | 12,16   | 12,12   | 21,23 |              |                                                                                                                                                                                                                                                                                                                                      |
| p15  | 12,13 | 7,9   | 20,20 | 28.2,31.2 | 11,13 | 14,16   | 9,10,11 | 18,22 | 17/17 (100%) | <ul style="list-style-type: none"> <li>- MSI in <b>CSF1P0</b></li> <li>- <b>FGA</b>: Deletion of allele (22) and insertion of (21)</li> </ul>                                                                                                                                                                                        |
| Pp15 | 12,13 | 7,9   | 20,20 | 28.2,31.2 | 11,13 | 14,16   | 9,10,11 | 18,21 |              |                                                                                                                                                                                                                                                                                                                                      |
| p16  | 12,12 | 8,10  | 19,25 | 28,31.2   | 11,11 | 14.2,16 | 10,13   | 19,25 | 16/16 (100%) | <ul style="list-style-type: none"> <li>- <b>D13S317</b> MSI: deletion of genotype (12,12) and insertion of (11,11)</li> <li>- <b>D7S820</b> MSI: deletion of (8,10) and insertion of (9,11)</li> <li>- <b>D18S51</b>: Deletion of allele (16) and insertion of (17)</li> <li>- LOH in <b>FGA</b>: Deletion of allele (19)</li> </ul> |
| Pp16 | 11,11 | 9,11  | 19,25 | 28,31.2   | 11,11 | 14.2,17 | 10,13   | 25,25 |              |                                                                                                                                                                                                                                                                                                                                      |
| p17  | 9,11  | 10,11 | 17,17 | 29.2,29.2 | 11,13 | 14,14   | 11,11   | 23,24 | 16/16 (100%) |                                                                                                                                                                                                                                                                                                                                      |
| Pp17 | 9,11  | 10,11 | 17,17 | 29.2,29.2 | 11,13 | 14,14   | 11,11   | 23,24 |              |                                                                                                                                                                                                                                                                                                                                      |

|      |       |       |       |           |       |           |         |       |                   |                                                                                  |
|------|-------|-------|-------|-----------|-------|-----------|---------|-------|-------------------|----------------------------------------------------------------------------------|
| p18  | 11,12 | 9,10  | 16,24 | 28,28.2   | 9,14  | 13,19     | 10,11   | 23,26 | 16/16 (100%)      | LOH in <b>D2S1338</b> : Deletion of allele (24)                                  |
| Pp18 | 11,12 | 9,10  | 16,16 | 28,28.2   | 9,14  | 13,19     | 10,11   | 23,26 |                   |                                                                                  |
| p19  | 10,10 | 8,11  | 21,24 | 28.2,30.2 | 8,9   | 12,14.2   | 10,11   | 22,25 | 16/16 (100%)      |                                                                                  |
| Pp19 | 10,10 | 8,11  | 21,24 | 28.2,30.2 | 8,9   | 12,14.2   | 10,11   | 22,25 |                   |                                                                                  |
| p20  | 11,13 | 10,12 | 16,23 | 28.2,29.2 | 12,13 | 13.2,14.2 | 9,12,13 | 22,23 | 16/17<br>(94.12%) | <b>CSF1PO</b> : Deletion of the triallelic pattern by the deletion of allele (9) |
| Pp20 | 11,13 | 10,12 | 16,23 | 28.2,29.2 | 12,13 | 13.2,14.2 | 12,13   | 22,23 |                   |                                                                                  |
| p21  | 12,14 | 9,10  | 16,20 | 28,28     | 10,13 | 15,16     | 11,13   | 23,23 | 16/16 (100%)      |                                                                                  |
| Pp21 | 12,14 | 9,10  | 16,20 | 28,28     | 10,13 | 15,16     | 11,13   | 23,23 |                   |                                                                                  |
| p22  | 8,8   | 11,11 | 18,19 | 28,29.2   | 9,11  | 12,12     | 10,13   | 25,25 | 16/16 (100%)      |                                                                                  |
| Pp22 | 8,8   | 11,11 | 18,19 | 28,29.2   | 9,11  | 12,12     | 10,13   | 25,25 |                   |                                                                                  |
| p23  | 9,12  | 10,10 | 17,25 | 28,29     | 9,9   | 14,14     | 10,11   | 19,25 | 16/16 (100%)      |                                                                                  |
| Pp23 | 9,12  | 10,10 | 17,25 | 28,29     | 9,9   | 14,14     | 10,11   | 19,25 |                   |                                                                                  |

|      |       |       |       |           |       |         |       |       |              |  |
|------|-------|-------|-------|-----------|-------|---------|-------|-------|--------------|--|
| p24  | 10,14 | 10,11 | 18,24 | 29.2,29.2 | 11,13 | 13,16   | 11,12 | 20,26 | 16/16 (100%) |  |
| Pp24 | 10,14 | 10,11 | 18,24 | 29.2,29.2 | 11,13 | 13,16   | 11,12 | 20,26 |              |  |
| p25  | 12,12 | 9,10  | 17,18 | 28,28.2   | 12,12 | 12,14   | 10,10 | 26,28 | 16/16 (100%) |  |
| Pp25 | 12,12 | 9,10  | 17,18 | 28,28.2   | 12,12 | 12,14   | 10,10 | 26,28 |              |  |
| p26  | 9,12  | 8,12  | 20,20 | 28,31     | 10,11 | 18,23   | 12,12 | 21,22 | 16/16 (100%) |  |
| Pp26 | 9,12  | 8,12  | 20,20 | 28,31     | 10,11 | 18,23   | 12,12 | 21,22 |              |  |
| p27  | 8,12  | 10,10 | 19,20 | 28,28.2   | 11,12 | 17,17   | 10,11 | 22,23 | 16/16 (100%) |  |
| Pp27 | 8,12  | 10,10 | 19,20 | 28,28.2   | 11,12 | 17,17   | 10,11 | 22,23 |              |  |
| p28  | 11,11 | 10,12 | 17,23 | 27,29.2   | 11,11 | 18,18   | 10,15 | 21,22 | 16/16 (100%) |  |
| Pp28 | 11,11 | 10,12 | 17,23 | 27,29.2   | 11,11 | 18,18   | 10,15 | 21,22 |              |  |
| p29  | 12,14 | 10,12 | 16,17 | 28.2,28.2 | 11,11 | 12,14.2 | 9,12  | 22,24 | 16/16 (100%) |  |
| Pp29 | 12,14 | 10,12 | 16,17 | 28.2,28.2 | 11,11 | 12,14.2 | 9,12  | 22,24 |              |  |

|      |       |       |       |           |       |       |       |       |              |                                     |
|------|-------|-------|-------|-----------|-------|-------|-------|-------|--------------|-------------------------------------|
| p30  | 11,11 | 10,11 | 19,21 | 28.2,28.2 | 12,13 | 14,15 | 11,12 | 20,22 | 16/16 (100%) | LOH in FGA: deletion of allele (22) |
| Pp30 | 11,11 | 10,11 | 19,21 | 28.2,28.2 | 12,13 | 14,15 | 11,12 | 20,20 |              |                                     |
| p31  | 8,12  | 10,10 | 20,25 | 33,33     | 11,11 | 13,16 | 12,12 | 22,24 | 16/16 (100%) |                                     |
| Pp31 | 8,12  | 10,10 | 20,25 | 33,33     | 11,11 | 13,16 | 12,12 | 22,24 |              |                                     |
| p32  | 13,14 | 8,10  | 17,17 | 29.2,33   | 8,12  | 12,18 | 10,11 | 20,23 | 0/16 (0%)    | Complete allelic Dropout            |
| Pp32 | DO    | DO    | DO    | DO        | DO    | DO    | DO    | DO    |              |                                     |
| p33  | 10,11 | 9,10  | 17,20 | 30.2,32   | 11,11 | 13,19 | 10,10 | 21,24 | 16/16 (100%) |                                     |
| Pp33 | 10,11 | 9,10  | 17,20 | 30.2,32   | 11,11 | 13,19 | 10,10 | 21,24 |              |                                     |
| p34  | 8,11  | 9,10  | 19,20 | 28,29     | 9,11  | 13,14 | 10,12 | 20,23 | 16/16 (100%) |                                     |
| Pp34 | 8,11  | 9,10  | 19,20 | 28,29     | 9,11  | 13,14 | 10,12 | 20,23 |              |                                     |
| p35  | 12,13 | 9,13  | 20,20 | 28,30     | 11,12 | 16,20 | 10,12 | 23,25 | 16/16 (100%) |                                     |
| Pp35 | 12,13 | 9,13  | 20,20 | 28,30     | 11,12 | 16,20 | 10,12 | 23,25 |              |                                     |

|      |       |       |       |         |         |         |       |       |              |                                                                              |
|------|-------|-------|-------|---------|---------|---------|-------|-------|--------------|------------------------------------------------------------------------------|
| p36  | 11,12 | 12,12 | 17,20 | 28,30   | 9,11    | 12,13   | 10,12 | 22,24 | 16/16 (100%) | LOH in <b>D21S11</b> : Deletion of allele (30)                               |
| Pp36 | 11,12 | 12,12 | 17,20 | 28,28   | 9,11    | 12,13   | 10,12 | 22,24 |              |                                                                              |
| p37  | 11,13 | 9,10  | 19,24 | 28,30   | 9,12    | 16,20   | 10,11 | 20,20 | 16/16 (100%) |                                                                              |
| Pp37 | 11,13 | 9,10  | 19,24 | 28,30   | 9,12    | 16,20   | 10,11 | 20,20 |              |                                                                              |
| p38  | 10,12 | 10,12 | 23,23 | 28,29.2 | 13,13   | 13,16   | 10,11 | 21,25 | 16/16 (100%) | LOH in <b>D21S11</b> Deletion of allele (29.2)                               |
| Pp38 | 10,12 | 10,12 | 23,23 | 28,28   | 13,13   | 13,16   | 10,11 | 21,25 |              |                                                                              |
| p39  | 8,11  | 12,12 | 12,24 | 31,32   | 12,12   | 13,15   | 10,10 | 23,23 | 16/16 (100%) | - MSI in <b>D2S1338</b> :<br>- Deletion of allele (12) and insertion of (18) |
| Pp39 | 8,11  | 12,12 | 18,24 | 31,32   | 12,12   | 13,15   | 10,10 | 23,23 |              |                                                                              |
| p40  | 12,12 | 10,11 | 20,22 | 28,29.2 | 11,14   | 13.2,16 | 11,12 | 19,25 | 12/16 (100%) | Allelic dropout in <b>D16S539</b> and <b>FGA</b>                             |
| Pp40 | 12,12 | 10,11 | 20,22 | 28,29.2 | DO      | 13.2,16 | 11,12 | DO    |              |                                                                              |
| p41  | 12,12 | 10,11 | 17,18 | 30,34   | 8,10,11 | 16,17   | 11,12 | 22,24 | 17/17 (100%) | MSI in <b>D16S539</b>                                                        |



|      |       |       |       |       |         |       |       |       |  |  |
|------|-------|-------|-------|-------|---------|-------|-------|-------|--|--|
| Pp41 | 12,12 | 10,11 | 17,18 | 30,34 | 8,10,11 | 16,17 | 11,12 | 22,24 |  |  |
|------|-------|-------|-------|-------|---------|-------|-------|-------|--|--|

**DO**, allelic dropout; **LOH**, loss of heterozygosity; **MSI**, microsatellite instability; **P**, genomic DNA STR profile; **Pp**, Cf-DNA STR profile.
